# Supplementary material
Source: publisher figshare collection journal article supplement (https://gsapubs.figshare.com/ndownloader/files/22410018)
Supplement: Supplementary file 1 [file 22410018]

## Sheet: Sheet1
Injectite #1
Segment #	GPS Point #	Northings (m)	Eastings (m)	Elevation (m)					Northings (ft)	Eastings (ft)	Elevation (ft)
-2	747	462732	642628	1229.7					1.51815e+06	2.10836e+06	4034.46
	748	462733	642628	1229.74					1.51815e+06	2.10836e+06	4034.59
	749	462733	642628	1229.73					1.51815e+06	2.10836e+06	4034.55
	750	462732	642628	1229.67					1.51815e+06	2.10836e+06	4034.36
	751	462732	642628	1229.6					1.51815e+06	2.10836e+06	4034.11
	752	462732	642628	1229.66					1.51815e+06	2.10836e+06	4034.3
	753	462732	642628	1229.69					1.51815e+06	2.10836e+06	4034.42
-1	738	462749	642621	1232.26					1.51821e+06	2.10834e+06	4042.84
	739	462750	642620	1232.17					1.51821e+06	2.10833e+06	4042.56
	740	462749	642620	1232.14					1.51821e+06	2.10833e+06	4042.45
	741	462749	642620	1232.04					1.5182e+06	2.10833e+06	4042.14
	742	462748	642620	1231.96					1.5182e+06	2.10833e+06	4041.86
	743	462748	642621	1232.08					1.5182e+06	2.10834e+06	4042.25
	744	462748	642621	1232.17					1.5182e+06	2.10834e+06	4042.55
	745	462749	642621	1232.23					1.5182e+06	2.10834e+06	4042.75
	746	462749	642621	1232.21					1.51821e+06	2.10834e+06	4042.67
0	691	462764	642619	1235.34					1.51825e+06	2.10833e+06	4052.94
	692	462764	642619	1235.59					1.51826e+06	2.10833e+06	4053.77
	693	462765	642619	1235.42					1.51826e+06	2.10833e+06	4053.22
	694	462765	642619	1235.11					1.51826e+06	2.10833e+06	4052.2
	695	462765	642619	1235.07					1.51826e+06	2.10833e+06	4052.07
	696	462766	642619	1234.94					1.51826e+06	2.10833e+06	4051.64
	697	462766	642618	1234.83					1.51826e+06	2.10833e+06	4051.29
	698	462767	642619	1234.64					1.51826e+06	2.10833e+06	4050.66
	699	462768	642618	1234.37					1.51827e+06	2.10833e+06	4049.78
	700	462769	642618	1234.16					1.51827e+06	2.10833e+06	4049.09
	701	462770	642617	1233.91					1.51827e+06	2.10832e+06	4048.25
	702	462770	642617	1233.8					1.51827e+06	2.10832e+06	4047.89
	703	462769	642617	1233.9					1.51827e+06	2.10832e+06	4048.23
	704	462769	642617	1234.1					1.51827e+06	2.10832e+06	4048.9
	705	462768	642617	1234.26					1.51827e+06	2.10832e+06	4049.42
	706	462768	642618	1234.4					1.51827e+06	2.10833e+06	4049.88
	707	462767	642618	1234.51					1.51827e+06	2.10833e+06	4050.24
	708	462767	642618	1234.53					1.51826e+06	2.10833e+06	4050.3
	709	462765	642618	1234.85					1.51826e+06	2.10833e+06	4051.34
	710	462765	642618	1234.91					1.51826e+06	2.10833e+06	4051.56
	711	462764	642619	1235					1.51826e+06	2.10833e+06	4051.84
	712	462764	642618	1234.91					1.51826e+06	2.10833e+06	4051.55
	713	462764	642618	1234.79					1.51826e+06	2.10833e+06	4051.15
	714	462764	642617	1234.69					1.51826e+06	2.10833e+06	4050.82
	715	462764	642617	1234.24					1.51826e+06	2.10832e+06	4049.36
	716	462764	642617	1234.34					1.51825e+06	2.10832e+06	4049.67
	717	462762	642618	1234.53					1.51825e+06	2.10833e+06	4050.29
	718	462761	642619	1234.58					1.51825e+06	2.10833e+06	4050.46
	719	462761	642619	1234.61					1.51824e+06	2.10833e+06	4050.55
	720	462760	642620	1234.49					1.51824e+06	2.10833e+06	4050.16
	721	462759	642620	1234.45					1.51824e+06	2.10833e+06	4050.02
	722	462759	642620	1234.35					1.51824e+06	2.10833e+06	4049.71
	723	462758	642621	1234.26					1.51824e+06	2.10834e+06	4049.42
	724	462758	642621	1234.12					1.51823e+06	2.10834e+06	4048.95
	725	462757	642621	1233.82					1.51823e+06	2.10834e+06	4047.97
	726	462757	642621	1234.09					1.51823e+06	2.10834e+06	4048.87
	727	462757	642622	1234.29					1.51823e+06	2.10834e+06	4049.51
	728	462758	642621	1234.4					1.51824e+06	2.10834e+06	4049.88
	729	462759	642621	1234.57					1.51824e+06	2.10834e+06	4050.44
	730	462760	642620	1234.72					1.51824e+06	2.10833e+06	4050.9
	731	462761	642620	1234.79					1.51824e+06	2.10833e+06	4051.14
	732	462762	642619	1234.89					1.51825e+06	2.10833e+06	4051.48
	733	462763	642618	1234.92					1.51825e+06	2.10833e+06	4051.59
	734	462763	642618	1235.04					1.51825e+06	2.10833e+06	4051.96
	735	462764	642618	1235.19					1.51825e+06	2.10833e+06	4052.47
	736	462764	642619	1235.29					1.51825e+06	2.10833e+06	4052.78
	737	462764	642619	1235.37					1.51825e+06	2.10833e+06	4053.04
1	2	462830	642556	1237.63					1.51847e+06	2.10812e+06	4060.47
	3	462831	642555	1237.72					1.51847e+06	2.10812e+06	4060.75
	4	462831	642555	1237.94					1.51848e+06	2.10812e+06	4061.48
	5	462832	642556	1237.9					1.51848e+06	2.10812e+06	4061.35
	6	462832	642555	1237.97					1.51848e+06	2.10812e+06	4061.59
	7	462833	642556	1237.89					1.51848e+06	2.10812e+06	4061.32
	8	462833	642556	1237.72					1.51848e+06	2.10812e+06	4060.76
	9	462834	642557	1237.53					1.51848e+06	2.10813e+06	4060.14
	10	462834	642556	1237.29					1.51848e+06	2.10812e+06	4059.36
	11	462834	642556	1237.33					1.51848e+06	2.10812e+06	4059.49
	12	462833	642555	1237.24					1.51848e+06	2.10812e+06	4059.2
	13	462833	642555	1237.11					1.51848e+06	2.10812e+06	4058.78
	14	462832	642555	1237.12					1.51848e+06	2.10812e+06	4058.78
	15	462831	642554	1237.18					1.51848e+06	2.10812e+06	4058.98
	16	462831	642555	1237.55					1.51847e+06	2.10812e+06	4060.21
	17	462830	642555	1237.53					1.51847e+06	2.10812e+06	4060.14
	18	462830	642555	1237.13					1.51847e+06	2.10812e+06	4058.81
	19	462829	642555	1236.84					1.51847e+06	2.10812e+06	4057.87
	20	462829	642554	1236.62					1.51847e+06	2.10812e+06	4057.14
	21	462828	642554	1236.56					1.51847e+06	2.10812e+06	4056.97
	22	462828	642554	1236.4					1.51847e+06	2.10812e+06	4056.42
	23	462828	642553	1236.14					1.51846e+06	2.10811e+06	4055.57
	24	462827	642553	1235.84					1.51846e+06	2.10811e+06	4054.6
	25	462826	642553	1235.7					1.51846e+06	2.10811e+06	4054.12
	26	462825	642553	1235.51					1.51846e+06	2.10811e+06	4053.52
	27	462826	642553	1235.9					1.51846e+06	2.10811e+06	4054.8
	28	462826	642554	1236.45					1.51846e+06	2.10812e+06	4056.58
	29	462827	642555	1236.7					1.51846e+06	2.10812e+06	4057.42
	30	462827	642555	1236.96					1.51846e+06	2.10812e+06	4058.27
	31	462828	642555	1237.31					1.51846e+06	2.10812e+06	4059.42
	32	462828	642556	1237.43					1.51847e+06	2.10812e+06	4059.8
	33	462829	642556	1237.53					1.51847e+06	2.10812e+06	4060.15
	34	462830	642556	1237.67					1.51847e+06	2.10812e+06	4060.6
	35	462830	642556	1237.54					1.51847e+06	2.10812e+06	4060.19
2	36	462827	642576	1237.51					1.51846e+06	2.10819e+06	4060.07
	37	462827	642576	1237.65					1.51846e+06	2.10819e+06	4060.54
	38	462827	642577	1237.82					1.51846e+06	2.10819e+06	4061.1
	39	462827	642577	1238.06					1.51846e+06	2.10819e+06	4061.89
	40	462827	642577	1238.19					1.51846e+06	2.10819e+06	4062.3
	41	462827	642577	1238.31					1.51846e+06	2.10819e+06	4062.68
	42	462827	642578	1238.45					1.51846e+06	2.10819e+06	4063.16
	43	462828	642577	1238.29					1.51846e+06	2.10819e+06	4062.64
	44	462828	642577	1238.05					1.51846e+06	2.10819e+06	4061.86
	45	462827	642577	1237.87					1.51846e+06	2.10819e+06	4061.27
	46	462827	642576	1237.75					1.51846e+06	2.10819e+06	4060.85
	47	462827	642576	1237.58					1.51846e+06	2.10819e+06	4060.32
	48	462827	642576	1237.37					1.51846e+06	2.10819e+06	4059.61
	49	462826	642576	1237.15					1.51846e+06	2.10819e+06	4058.89
3	50	462833	642583	1241.94					1.51848e+06	2.10821e+06	4074.6
	51	462833	642583	1242.19					1.51848e+06	2.10821e+06	4075.43
	52	462833	642583	1242.55					1.51848e+06	2.10821e+06	4076.59
	53	462834	642583	1242.76					1.51848e+06	2.10821e+06	4077.29
	54	462835	642583	1242.79					1.51849e+06	2.10821e+06	4077.39
	55	462835	642583	1242.73					1.51849e+06	2.10821e+06	4077.2
	56	462835	642583	1242.54					1.51849e+06	2.10821e+06	4076.57
	57	462835	642582	1241.76					1.51849e+06	2.10821e+06	4074.02
	58	462834	642582	1241.76					1.51848e+06	2.10821e+06	4074.01
	59	462833	642582	1241.54					1.51848e+06	2.10821e+06	4073.3
	60	462832	642581	1241.16					1.51848e+06	2.10821e+06	4072.06
4	61	462838	642583	1243.19					1.5185e+06	2.10821e+06	4078.69
	62	462839	642583	1243.58					1.5185e+06	2.10821e+06	4079.98
	63	462840	642583	1244.38					1.5185e+06	2.10821e+06	4082.62
	64	462841	642583	1244.68					1.51851e+06	2.10821e+06	4083.6
	65	462842	642583	1245.19					1.51851e+06	2.10821e+06	4085.27
	66	462843	642583	1245.74					1.51851e+06	2.10821e+06	4087.09
	67	462844	642583	1246.18					1.51852e+06	2.10821e+06	4088.5
	68	462846	642583	1246.75					1.51852e+06	2.10821e+06	4090.39
	69	462847	642583	1247.17					1.51853e+06	2.10821e+06	4091.76
	70	462848	642583	1247.79					1.51853e+06	2.10821e+06	4093.8
	71	462850	642583	1248.51					1.51854e+06	2.10821e+06	4096.17
	72	462851	642583	1248.77					1.51854e+06	2.10821e+06	4097.02
	73	462852	642583	1248.92					1.51854e+06	2.10821e+06	4097.51
	74	462852	642583	1248.81					1.51854e+06	2.10821e+06	4097.15
	75	462853	642583	1248.39					1.51855e+06	2.10821e+06	4095.78
	76	462853	642582	1247.79					1.51855e+06	2.10821e+06	4093.8
	77	462852	642582	1247.63					1.51854e+06	2.10821e+06	4093.28
	78	462851	642582	1247.39					1.51854e+06	2.10821e+06	4092.49
	79	462850	642582	1247.27					1.51854e+06	2.10821e+06	4092.1
	80	462849	642582	1247.06					1.51853e+06	2.10821e+06	4091.39
	81	462848	642582	1246.8					1.51853e+06	2.10821e+06	4090.54
	82	462847	642582	1246.38					1.51853e+06	2.10821e+06	4089.18
	83	462847	642582	1246.12					1.51853e+06	2.10821e+06	4088.31
	84	462845	642582	1245.81					1.51852e+06	2.10821e+06	4087.3
	85	462844	642581	1245.12					1.51852e+06	2.10821e+06	4085.03
	86	462842	642582	1244.79					1.51851e+06	2.10821e+06	4083.96
	87	462841	642582	1244.2					1.51851e+06	2.10821e+06	4082.03
	88	462840	642582	1243.87					1.5185e+06	2.10821e+06	4080.95
	89	462839	642582	1243.46					1.5185e+06	2.10821e+06	4079.59
	90	462838	642582	1243.32					1.5185e+06	2.10821e+06	4079.12
	91	462838	642582	1242.86					1.5185e+06	2.10821e+06	4077.63
	92	462837	642582	1242.55					1.51849e+06	2.10821e+06	4076.61
	93	462837	642583	1242.77					1.5185e+06	2.10821e+06	4077.34
5	94	462856	642582	1249.46					1.51856e+06	2.10821e+06	4099.28
	95	462857	642581	1250.24					1.51856e+06	2.10821e+06	4101.84
	96	462858	642581	1251.23					1.51856e+06	2.10821e+06	4105.07
	97	462860	642581	1252.2					1.51857e+06	2.10821e+06	4108.26
	98	462862	642582	1253.15					1.51858e+06	2.10821e+06	4111.37
	99	462865	642582	1253.85					1.51858e+06	2.10821e+06	4113.68
	100	462867	642582	1254.81					1.51859e+06	2.10821e+06	4116.83
	101	462870	642582	1254.94					1.5186e+06	2.10821e+06	4117.25
	102	462870	642581	1254.59					1.5186e+06	2.10821e+06	4116.11
	103	462869	642581	1253.95					1.5186e+06	2.10821e+06	4114
	104	462868	642581	1253.72					1.5186e+06	2.1082e+06	4113.26
	105	462867	642580	1253.21					1.51859e+06	2.1082e+06	4111.59
	106	462866	642580	1253.02					1.51859e+06	2.1082e+06	4110.94
	107	462865	642580	1252.79					1.51859e+06	2.1082e+06	4110.19
	108	462865	642580	1252.35					1.51858e+06	2.1082e+06	4108.75
	109	462864	642580	1251.93					1.51858e+06	2.1082e+06	4107.39
	110	462862	642580	1251.3					1.51858e+06	2.1082e+06	4105.32
	111	462861	642580	1250.83					1.51857e+06	2.1082e+06	4103.77
	112	462860	642580	1250.48					1.51857e+06	2.1082e+06	4102.62
	113	462858	642580	1249.78					1.51856e+06	2.1082e+06	4100.34
	114	462857	642580	1249.05					1.51856e+06	2.1082e+06	4097.93
	115	462856	642580	1248.63					1.51856e+06	2.1082e+06	4096.56
	116	462855	642580	1248.25					1.51855e+06	2.1082e+06	4095.3
	117	462855	642580	1248.4					1.51855e+06	2.1082e+06	4095.79
	118	462855	642581	1248.68					1.51855e+06	2.10821e+06	4096.73
	119	462855	642582	1249.06					1.51855e+06	2.10821e+06	4097.96
6	120	462876	642581	1256.8					1.51862e+06	2.10821e+06	4123.35
	121	462876	642582	1257.05					1.51862e+06	2.10821e+06	4124.2
	122	462876	642582	1257.5					1.51862e+06	2.10821e+06	4125.67
	123	462877	642582	1257.89					1.51863e+06	2.10821e+06	4126.95
	124	462878	642582	1258.37					1.51863e+06	2.10821e+06	4128.51
	125	462879	642582	1258.75					1.51863e+06	2.10821e+06	4129.77
	126	462879	642582	1258.94					1.51863e+06	2.10821e+06	4130.39
	127	462880	642583	1259.23					1.51863e+06	2.10821e+06	4131.34
	128	462881	642583	1259.17					1.51864e+06	2.10821e+06	4131.14
	129	462882	642583	1259.15					1.51864e+06	2.10821e+06	4131.06
	130	462882	642583	1259.16					1.51864e+06	2.10821e+06	4131.1
	131	462883	642583	1259.06					1.51864e+06	2.10821e+06	4130.78
	132	462883	642583	1258.94					1.51865e+06	2.10821e+06	4130.39
	133	462883	642582	1258.63					1.51864e+06	2.10821e+06	4129.35
	134	462882	642582	1258.32					1.51864e+06	2.10821e+06	4128.34
	135	462882	642582	1258.19					1.51864e+06	2.10821e+06	4127.92
	136	462881	642581	1257.82					1.51864e+06	2.10821e+06	4126.72
	137	462880	642581	1257.45					1.51864e+06	2.10821e+06	4125.5
	138	462879	642581	1257.16					1.51863e+06	2.10821e+06	4124.53
	139	462878	642581	1256.68					1.51863e+06	2.1082e+06	4122.97
	140	462877	642581	1256.31					1.51863e+06	2.1082e+06	4121.76
	141	462876	642581	1256.14					1.51862e+06	2.10821e+06	4121.19
	142	462876	642581	1255.82					1.51862e+06	2.10821e+06	4120.13
	143	462875	642581	1255.74					1.51862e+06	2.10821e+06	4119.88
	144	462875	642581	1256.06					1.51862e+06	2.10821e+06	4120.94
	145	462875	642581	1256.46					1.51862e+06	2.10821e+06	4122.24
7	146	462887	642580	1259.53					1.51866e+06	2.1082e+06	4132.33
	147	462886	642581	1259.45					1.51866e+06	2.1082e+06	4132.04
	148	462887	642581	1259.46					1.51866e+06	2.10821e+06	4132.1
	149	462887	642582	1259.5					1.51866e+06	2.10821e+06	4132.23
	150	462887	642583	1259.45					1.51866e+06	2.10821e+06	4132.06
	151	462888	642583	1259.38					1.51866e+06	2.10821e+06	4131.83
	152	462889	642583	1259.23					1.51866e+06	2.10821e+06	4131.32
	153	462891	642584	1258.78					1.51867e+06	2.10822e+06	4129.86
	154	462894	642585	1258.06					1.51868e+06	2.10822e+06	4127.48
	155	462895	642583	1257.82					1.51868e+06	2.10821e+06	4126.7
	156	462893	642582	1258.21					1.51868e+06	2.10821e+06	4127.99
	157	462891	642581	1258.83					1.51867e+06	2.10821e+06	4130.01
	158	462889	642580	1259.19					1.51866e+06	2.1082e+06	4131.2
	159	462888	642580	1259.42					1.51866e+06	2.1082e+06	4131.94
8	160	462894	642593	1258.53					1.51868e+06	2.10824e+06	4129.02
	161	462895	642593	1258.33					1.51868e+06	2.10824e+06	4128.38
	162	462895	642593	1258.13					1.51869e+06	2.10824e+06	4127.71
	163	462896	642593	1257.9					1.51869e+06	2.10824e+06	4126.97
	164	462896	642593	1257.65					1.51869e+06	2.10824e+06	4126.15
	165	462897	642593	1257.31					1.51869e+06	2.10824e+06	4125.03
	166	462897	642592	1256.99					1.51869e+06	2.10824e+06	4123.99
	167	462898	642592	1256.71					1.51869e+06	2.10824e+06	4123.05
	168	462898	642592	1256.46					1.5187e+06	2.10824e+06	4122.23
	169	462899	642592	1256.22					1.5187e+06	2.10824e+06	4121.47
	170	462899	642592	1256.3					1.5187e+06	2.10824e+06	4121.71
	171	462898	642592	1256.66					1.51869e+06	2.10824e+06	4122.89
	172	462897	642592	1257.09					1.51869e+06	2.10824e+06	4124.31
	173	462896	642592	1257.25					1.51869e+06	2.10824e+06	4124.82
	174	462896	642592	1257.5					1.51869e+06	2.10824e+06	4125.66
	175	462894	642592	1258					1.51868e+06	2.10824e+06	4127.3
	176	462894	642592	1258.25					1.51868e+06	2.10824e+06	4128.12
	177	462894	642592	1258.47					1.51868e+06	2.10824e+06	4128.85
	178	462894	642593	1258.59					1.51868e+06	2.10824e+06	4129.24
9	179	462902	642592	1255.43					1.51871e+06	2.10824e+06	4118.87
	180	462902	642592	1255.16					1.51871e+06	2.10824e+06	4117.97
	181	462903	642592	1255.01					1.51871e+06	2.10824e+06	4117.48
	182	462902	642591	1255.13					1.51871e+06	2.10824e+06	4117.9
	183	462901	642591	1255.44					1.51871e+06	2.10824e+06	4118.89
	184	462901	642592	1255.52					1.51871e+06	2.10824e+06	4119.15
10	185	462908	642593	1253.53					1.51873e+06	2.10825e+06	4112.62
	186	462909	642593	1253.39					1.51873e+06	2.10825e+06	4112.17
	187	462909	642594	1253.18					1.51873e+06	2.10825e+06	4111.48
	188	462909	642593	1253.18					1.51873e+06	2.10825e+06	4111.48
	189	462908	642593	1253.25					1.51873e+06	2.10824e+06	4111.7
	190	462908	642593	1253.33					1.51873e+06	2.10824e+06	4111.97
	191	462908	642592	1253.46					1.51873e+06	2.10824e+06	4112.4
	192	462908	642593	1253.53					1.51873e+06	2.10824e+06	4112.64
	193	462908	642593	1253.52					1.51873e+06	2.10824e+06	4112.61
	194	462908	642593	1253.53					1.51873e+06	2.10824e+06	4112.64
11	195	462912	642597	1253.21					1.51874e+06	2.10826e+06	4111.58
	196	462912	642598	1253					1.51874e+06	2.10826e+06	4110.88
	197	462912	642598	1252.96					1.51874e+06	2.10826e+06	4110.75
	198	462912	642598	1252.73					1.51874e+06	2.10826e+06	4110
	199	462913	642598	1252.6					1.51874e+06	2.10826e+06	4109.59
	200	462913	642598	1252.37					1.51874e+06	2.10826e+06	4108.83
	201	462913	642598	1252.4					1.51874e+06	2.10826e+06	4108.94
	202	462913	642597	1252.43					1.51874e+06	2.10826e+06	4109.03
	203	462913	642597	1252.43					1.51874e+06	2.10826e+06	4109.01
	204	462912	642597	1252.68					1.51874e+06	2.10826e+06	4109.84
	205	462912	642597	1252.77					1518739	2.10826e+06	4110.15
	206	462911	642597	1252.87					1.51874e+06	2.10826e+06	4110.47
	207	462911	642596	1253.06					1.51874e+06	2.10826e+06	4111.09
	208	462911	642596	1253.08					1.51874e+06	2.10826e+06	4111.15
	209	462910	642596	1253.07					1.51873e+06	2.10825e+06	4111.11
	210	462910	642595	1253.06					1.51873e+06	2.10825e+06	4111.1
	211	462910	642595	1252.82					1.51873e+06	2.10825e+06	4110.32
	212	462910	642595	1252.99					1.51873e+06	2.10825e+06	4110.85
	213	462910	642595	1253.36					1.51873e+06	2.10825e+06	4112.06
	214	462910	642596	1253.46					1.51873e+06	2.10825e+06	4112.39
	215	462910	642596	1253.5					1.51874e+06	2.10826e+06	4112.54
	216	462911	642597	1253.46					1.51874e+06	2.10826e+06	4112.41
	217	462911	642597	1253.4					1.51874e+06	2.10826e+06	4112.22
	218	462911	642597	1253.29					1.51874e+06	2.10826e+06	4111.84
	219	462911	642597	1253.29					1.51874e+06	2.10826e+06	4111.85
12	220	462875	642599	1263.85					1.51862e+06	2.10826e+06	4146.5
	221	462875	642599	1264.09					1.51862e+06	2.10826e+06	4147.27
	222	462876	642599	1264.35					1.51862e+06	2.10827e+06	4148.13
	223	462876	642599	1264.36					1.51862e+06	2.10827e+06	4148.17
	224	462876	642599	1264.29					1.51862e+06	2.10826e+06	4147.94
	225	462876	642599	1264.14					1.51862e+06	2.10826e+06	4147.45
	226	462875	642599	1263.94					1.51862e+06	2.10826e+06	4146.77
	227	462875	642598	1263.67					1.51862e+06	2.10826e+06	4145.9
	228	462875	642598	1263.45					1.51862e+06	2.10826e+06	4145.16
	229	462874	642598	1263.18					1.51862e+06	2.10826e+06	4144.31
	230	462874	642597	1262.94					1.51862e+06	2.10826e+06	4143.49
	231	462874	642598	1263					1.51862e+06	2.10826e+06	4143.72
	232	462874	642598	1263.16					1.51862e+06	2.10826e+06	4144.22
	233	462874	642598	1263.41					1.51862e+06	2.10826e+06	4145.03
	234	462875	642599	1263.7					1.51862e+06	2.10826e+06	4146
13	235	462878	642603	1264.77					1.51863e+06	2.10828e+06	4149.5
	236	462878	642603	1264.71					1.51863e+06	2.10828e+06	4149.31
	237	462878	642603	1264.46					1.51863e+06	2.10828e+06	4148.48
	238	462880	642604	1263.88					1.51863e+06	2.10828e+06	4146.59
	239	462880	642604	1263.56					1.51864e+06	2.10828e+06	4145.53
	240	462881	642604	1263.2					1.51864e+06	2.10828e+06	4144.34
	241	462882	642604	1262.79					1.51864e+06	2.10828e+06	4143.02
	242	462883	642604	1262.35					1.51864e+06	2.10828e+06	4141.58
	243	462883	642603	1262.23					1.51865e+06	2.10828e+06	4141.19
	244	462882	642603	1262.86					1.51864e+06	2.10828e+06	4143.24
	245	462882	642603	1263.08					1.51864e+06	2.10828e+06	4143.98
	246	462881	642602	1263.28					1.51864e+06	2.10828e+06	4144.63
	247	462880	642602	1263.82					1.51864e+06	2.10828e+06	4146.38
	248	462880	642602	1264.02					1.51863e+06	2.10827e+06	4147.03
	249	462879	642602	1264.21					1.51863e+06	2.10827e+06	4147.68
	250	462879	642600	1264.14					1.51863e+06	2.10827e+06	4147.46
	251	462879	642600	1264.11					1.51863e+06	2.10827e+06	4147.35
	252	462878	642600	1264.35					1.51863e+06	2.10827e+06	4148.15
	253	462877	642600	1264.55					1.51863e+06	2.10827e+06	4148.8
	254	462877	642601	1264.72					1.51862e+06	2.10827e+06	4149.36
	255	462877	642601	1264.77					1.51862e+06	2.10827e+06	4149.5
	256	462877	642602	1264.89					1.51862e+06	2.10827e+06	4149.91
	257	462877	642602	1264.89					1.51863e+06	2.10828e+06	4149.89
	258	462878	642603	1264.75					1.51863e+06	2.10828e+06	4149.45
14	259	462888	642606	1260.02					1.51866e+06	2.10829e+06	4133.91
	260	462888	642606	1259.79					1.51866e+06	2.10829e+06	4133.17
	261	462889	642606	1259.63					1.51866e+06	2.10829e+06	4132.64
	262	462888	642605	1259.93					1.51866e+06	2.10829e+06	4133.65
	263	462887	642605	1260.2					1.51866e+06	2.10829e+06	4134.5
	264	462887	642606	1260.12					1.51866e+06	2.10829e+06	4134.27
15	265	462894	642606	1258.07					1.51868e+06	2.10829e+06	4127.54
	266	462895	642606	1257.74					1.51869e+06	2.10829e+06	4126.43
	267	462896	642606	1257.41					1.51869e+06	2.10829e+06	4125.36
	268	462897	642606	1257.16					1.51869e+06	2.10829e+06	4124.55
	269	462898	642606	1256.71					1.51869e+06	2.10829e+06	4123.08
	270	462899	642606	1256.38					1.5187e+06	2.10829e+06	4121.99
	271	462900	642606	1255.95					1.5187e+06	2.10829e+06	4120.58
	272	462901	642606	1255.62					1.5187e+06	2.10829e+06	4119.48
	273	462902	642606	1255.23					1.51871e+06	2.10829e+06	4118.21
	274	462903	642607	1254.8					1.51871e+06	2.10829e+06	4116.81
	275	462904	642607	1254.41					1.51871e+06	2.10829e+06	4115.5
	276	462905	642607	1254.21					1.51872e+06	2.10829e+06	4114.87
	277	462905	642606	1254.32					1.51872e+06	2.10829e+06	4115.22
	278	462904	642606	1254.66					1.51871e+06	2.10829e+06	4116.33
	279	462903	642606	1255					1.51871e+06	2.10829e+06	4117.46
	280	462902	642606	1255.39					1.51871e+06	2.10829e+06	4118.74
	281	462901	642606	1255.77					1.51871e+06	2.10829e+06	4119.99
	282	462901	642606	1256.02					1.5187e+06	2.10829e+06	4120.8
	283	462900	642606	1256.28					1.5187e+06	2.10829e+06	4121.67
	284	462899	642605	1256.66					1.5187e+06	2.10829e+06	4122.9
	285	462898	642605	1256.99					1.5187e+06	2.10828e+06	4123.98
	286	462897	642605	1257.41					1.51869e+06	2.10828e+06	4125.35
	287	462897	642605	1257.74					1.51869e+06	2.10828e+06	4126.43
	288	462896	642604	1258.04					1.51869e+06	2.10828e+06	4127.44
	289	462895	642604	1258.3					1.51868e+06	2.10828e+06	4128.28
	290	462894	642604	1258.47					1.51868e+06	2.10828e+06	4128.82
	291	462893	642605	1258.68					1.51868e+06	2.10828e+06	4129.54
	292	462893	642605	1258.64					1.51868e+06	2.10829e+06	4129.4
	293	462893	642606	1258.43					1.51868e+06	2.10829e+06	4128.7
	294	462894	642606	1258.26					1.51868e+06	2.10829e+06	4128.15
16	295	462917	642605	1251.83					1.51876e+06	2.10828e+06	4107.04
	296	462917	642605	1251.65					1.51876e+06	2.10828e+06	4106.48
	297	462918	642605	1251.37					1.51876e+06	2.10828e+06	4105.55
	298	462917	642604	1251.34					1.51876e+06	2.10828e+06	4105.43
	299	462917	642604	1251.46					1.51876e+06	2.10828e+06	4105.84
	300	462916	642604	1251.65					1.51875e+06	2.10828e+06	4106.46
	301	462915	642604	1251.69					1.51875e+06	2.10828e+06	4106.6
	302	462915	642604	1251.86					1.51875e+06	2.10828e+06	4107.14
	303	462915	642605	1251.88					1.51875e+06	2.10828e+06	4107.22
	304	462916	642605	1251.86					1.51875e+06	2.10828e+06	4107.14
	305	462916	642605	1251.85					1.51875e+06	2.10828e+06	4107.11
17	306	462922	642606	1250.87					1.51877e+06	2.10829e+06	4103.89
	307	462923	642606	1250.89					1.51878e+06	2.10829e+06	4103.96
	308	462924	642606	1250.83					1.51878e+06	2.10829e+06	4103.78
	309	462924	642606	1250.74					1.51878e+06	2.10829e+06	4103.49
	310	462925	642606	1250.76					1.51878e+06	2.10829e+06	4103.55
	311	462925	642606	1250.87					1.51878e+06	2.10829e+06	4103.89
	312	462924	642605	1250.87					1.51878e+06	2.10829e+06	4103.92
	313	462923	642605	1250.89					1.51878e+06	2.10828e+06	4103.97
	314	462923	642605	1250.8					1.51878e+06	2.10828e+06	4103.68
	315	462923	642605	1250.85					1.51877e+06	2.10828e+06	4103.83
	316	462922	642605	1250.85					1.51877e+06	2.10829e+06	4103.84
18	317	462930	642607	1251.02					1.5188e+06	2.10829e+06	4104.41
	318	462931	642607	1251.06					1.5188e+06	2.10829e+06	4104.52
	319	462932	642607	1251.13					1.5188e+06	2.10829e+06	4104.77
	320	462932	642607	1251					1.51881e+06	2.10829e+06	4104.35
	321	462934	642607	1250.98					1.51881e+06	2.10829e+06	4104.27
	322	462935	642607	1250.95					1.51881e+06	2.10829e+06	4104.17
	323	462936	642608	1250.73					1.51882e+06	2.10829e+06	4103.43
	324	462937	642608	1250.65					1.51882e+06	2.10829e+06	4103.19
	325	462937	642608	1250.46					1.51882e+06	2.1083e+06	4102.55
	326	462939	642609	1250.25					1.51883e+06	2.1083e+06	4101.88
	327	462940	642609	1250.05					1.51883e+06	2.1083e+06	4101.2
	328	462940	642609	1249.74					1.51883e+06	2.1083e+06	4100.19
	329	462941	642609	1249.53					1.51884e+06	2.1083e+06	4099.51
	330	462943	642609	1249.44					1.51884e+06	2.1083e+06	4099.21
	331	462944	642610	1249.09					1.51885e+06	2.1083e+06	4098.06
	332	462945	642610	1248.73					1.51885e+06	2.1083e+06	4096.88
	333	462946	642609	1248.44					1.51885e+06	2.1083e+06	4095.95
	334	462947	642609	1248.36					1.51886e+06	2.1083e+06	4095.67
	335	462947	642608	1248.69					1.51885e+06	2.10829e+06	4096.75
	336	462946	642607	1249.04					1.51885e+06	2.10829e+06	4097.91
	337	462945	642607	1249.35					1.51885e+06	2.10829e+06	4098.93
	338	462944	642607	1249.5					1.51885e+06	2.10829e+06	4099.42
	339	462944	642608	1249.66					1.51884e+06	2.10829e+06	4099.95
	340	462943	642608	1249.82					1.51884e+06	2.10829e+06	4100.45
	341	462942	642607	1250.06					1.51884e+06	2.10829e+06	4101.26
	342	462941	642607	1250.21					1.51883e+06	2.10829e+06	4101.73
	343	462940	642607	1250.4					1.51883e+06	2.10829e+06	4102.37
	344	462939	642607	1250.64					1.51883e+06	2.10829e+06	4103.14
	345	462938	642607	1250.76					1.51883e+06	2.10829e+06	4103.55
	346	462937	642607	1250.79					1.51882e+06	2.10829e+06	4103.65
	347	462937	642607	1251					1.51882e+06	2.10829e+06	4104.34
	348	462936	642607	1251.05					1.51882e+06	2.10829e+06	4104.49
	349	462934	642606	1251.16					1.51881e+06	2.10829e+06	4104.85
	350	462933	642606	1251.38					1.51881e+06	2.10829e+06	4105.57
	351	462932	642606	1251.48					1.51881e+06	2.10829e+06	4105.9
	352	462932	642605	1251.28					1.5188e+06	2.10828e+06	4105.25
	353	462931	642604	1251					1.5188e+06	2.10828e+06	4104.33
	354	462929	642604	1250.88					1.5188e+06	2.10828e+06	4103.94
	355	462929	642605	1250.73					1.5188e+06	2.10828e+06	4103.46
	356	462928	642605	1250.78					1.51879e+06	2.10828e+06	4103.6
	357	462927	642605	1250.85					1.51879e+06	2.10829e+06	4103.85
	358	462926	642606	1250.94					1.51879e+06	2.10829e+06	4104.12
	359	462926	642607	1250.83					1.51879e+06	2.10829e+06	4103.77
	360	462927	642607	1250.82					1.51879e+06	2.10829e+06	4103.74
	361	462928	642607	1250.94					1.51879e+06	2.10829e+06	4104.12
19	362	462933	642603	1250.98					1.51881e+06	2.10828e+06	4104.25
	363	462934	642603	1250.95					1.51881e+06	2.10828e+06	4104.18
	364	462934	642603	1250.92					1.51881e+06	2.10828e+06	4104.08
	365	462935	642603	1250.74					1.51882e+06	2.10828e+06	4103.48
	366	462936	642603	1250.66					1.51882e+06	2.10828e+06	4103.22
	367	462937	642602	1250.45					1.51882e+06	2.10828e+06	4102.53
	368	462938	642602	1250.25					1.51882e+06	2.10827e+06	4101.86
	369	462938	642602	1250.14					1.51883e+06	2.10827e+06	4101.5
	370	462938	642602	1250.04					1.51883e+06	2.10827e+06	4101.2
	371	462939	642602	1249.88					1.51883e+06	2.10827e+06	4100.66
	372	462939	642602	1249.74					1.51883e+06	2.10827e+06	4100.19
	373	462940	642601	1249.63					1.51883e+06	2.10827e+06	4099.83
	374	462940	642601	1249.59					1.51883e+06	2.10827e+06	4099.7
	375	462941	642601	1249.55					1.51884e+06	2.10827e+06	4099.59
	376	462942	642601	1249.49					1.51884e+06	2.10827e+06	4099.38
	377	462942	642601	1249.42					1.51884e+06	2.10827e+06	4099.13
	378	462943	642600	1249.32					1.51884e+06	2.10827e+06	4098.83
	379	462942	642600	1249.31					1.51884e+06	2.10827e+06	4098.79
	380	462943	642600	1249.27					1.51884e+06	2.10827e+06	4098.66
	381	462943	642600	1249.1					1.51884e+06	2.10827e+06	4098.09
	382	462944	642599	1248.87					1.51884e+06	2.10827e+06	4097.34
	383	462945	642599	1248.7					1.51885e+06	2.10827e+06	4096.79
	384	462945	642599	1248.66					1.51885e+06	2.10826e+06	4096.66
	385	462946	642599	1248.65					1.51885e+06	2.10826e+06	4096.62
	386	462946	642599	1248.52					1.51885e+06	2.10826e+06	4096.19
	387	462947	642599	1248.33					1.51885e+06	2.10826e+06	4095.58
	388	462947	642598	1248.14					1.51886e+06	2.10826e+06	4094.95
	389	462947	642598	1248.07					1.51886e+06	2.10826e+06	4094.71
	390	462948	642598	1248.25					1.51886e+06	2.10826e+06	4095.3
	391	462948	642598	1248.31					1.51886e+06	2.10826e+06	4095.5
	392	462949	642598	1248.22					1.51886e+06	2.10826e+06	4095.21
	393	462949	642598	1248.06					1.51886e+06	2.10826e+06	4094.7
	394	462950	642597	1247.83					1.51886e+06	2.10826e+06	4093.92
	395	462950	642597	1247.59					1.51887e+06	2.10826e+06	4093.14
	396	462951	642597	1247.33					1.51887e+06	2.10826e+06	4092.28
	397	462952	642597	1247.37					1.51887e+06	2.10826e+06	4092.43
	398	462952	642596	1247.24					1.51887e+06	2.10826e+06	4091.99
	399	462953	642596	1246.9					1.51887e+06	2.10825e+06	4090.87
	400	462952	642596	1246.81					1.51887e+06	2.10825e+06	4090.57
	401	462953	642595	1246.86					1.51887e+06	2.10825e+06	4090.76
	402	462953	642595	1246.73					1.51888e+06	2.10825e+06	4090.33
	403	462953	642595	1246.55					1.51888e+06	2.10825e+06	4089.72
	404	462953	642595	1246.36					1.51888e+06	2.10825e+06	4089.1
	405	462953	642595	1246.3					1.51887e+06	2.10825e+06	4088.9
	406	462952	642595	1246.49					1.51887e+06	2.10825e+06	4089.52
	407	462952	642596	1246.67					1.51887e+06	2.10825e+06	4090.11
	408	462952	642596	1246.66					1.51887e+06	2.10825e+06	4090.1
	409	462951	642596	1246.8					1.51887e+06	2.10826e+06	4090.53
	410	462950	642596	1246.56					1.51887e+06	2.10826e+06	4089.77
	411	462949	642597	1246.6					1.51886e+06	2.10826e+06	4089.9
	412	462948	642597	1247.11					1.51886e+06	2.10826e+06	4091.57
	413	462947	642597	1247.41					1.51886e+06	2.10826e+06	4092.56
	414	462947	642598	1247.88					1.51885e+06	2.10826e+06	4094.08
	415	462947	642598	1248.02					1.51885e+06	2.10826e+06	4094.55
	416	462946	642598	1247.91					1.51885e+06	2.10826e+06	4094.18
	417	462946	642598	1248.03					1.51885e+06	2.10826e+06	4094.57
	418	462945	642598	1248.46					1.51885e+06	2.10826e+06	4095.99
	419	462943	642599	1248.59					1.51884e+06	2.10827e+06	4096.41
	420	462943	642599	1248.59					1.51884e+06	2.10827e+06	4096.42
	421	462942	642600	1248.81					1.51884e+06	2.10827e+06	4097.15
	422	462942	642600	1248.92					1.51884e+06	2.10827e+06	4097.52
	423	462942	642600	1249.05					1.51884e+06	2.10827e+06	4097.92
	424	462941	642600	1249.04					1.51884e+06	2.10827e+06	4097.91
	425	462940	642601	1249.18					1.51883e+06	2.10827e+06	4098.35
	426	462939	642601	1249.21					1.51883e+06	2.10827e+06	4098.46
	427	462939	642601	1249.17					1.51883e+06	2.10827e+06	4098.32
	428	462938	642602	1249.37					1.51882e+06	2.10827e+06	4098.99
	429	462937	642602	1249.61					1.51882e+06	2.10827e+06	4099.76
	430	462936	642602	1249.88					1.51882e+06	2.10827e+06	4100.67
	431	462935	642602	1250.2					1.51882e+06	2.10827e+06	4101.7
	432	462934	642602	1250.37					1.51881e+06	2.10828e+06	4102.27
	433	462933	642602	1250.5					1.51881e+06	2.10828e+06	4102.69
	434	462932	642602	1250.49					1.51881e+06	2.10828e+06	4102.66
	435	462931	642603	1250.41					1.5188e+06	2.10828e+06	4102.4
	436	462930	642603	1250.44					1.5188e+06	2.10828e+06	4102.5
	437	462931	642603	1250.79					1.5188e+06	2.10828e+06	4103.63
	438	462932	642603	1250.91					1.5188e+06	2.10828e+06	4104.04
	439	462933	642603	1250.94					1.51881e+06	2.10828e+06	4104.13
20	440	462955	642593	1246.44					1.51888e+06	2.10825e+06	4089.38
	441	462956	642594	1246.61					1.51888e+06	2.10825e+06	4089.91
	442	462957	642593	1246.51					1.51889e+06	2.10825e+06	4089.61
	443	462957	642593	1246.32					1.51889e+06	2.10825e+06	4088.98
	444	462957	642593	1246.19					1.51889e+06	2.10824e+06	4088.56
	445	462956	642593	1245.94					1.51889e+06	2.10824e+06	4087.74
	446	462955	642593	1245.9					1.51888e+06	2.10824e+06	4087.61
	447	462955	642593	1246.13					1.51888e+06	2.10824e+06	4088.35
	448	462955	642593	1246.41					1.51888e+06	2.10825e+06	4089.28
21	494	463028	642612	1236.43					1.51912e+06	2.10831e+06	4056.51
	495	463028	642612	1236.41					1.51912e+06	2.10831e+06	4056.45
	496	463029	642612	1236.29					1.51912e+06	2.10831e+06	4056.07
	497	463029	642611	1236.19					1.51912e+06	2.1083e+06	4055.74
	498	463029	642611	1236.22					1.51912e+06	2.1083e+06	4055.85
	499	463028	642611	1236.31					1.51912e+06	2.1083e+06	4056.12
	500	463027	642611	1236.3					1.51912e+06	2.1083e+06	4056.1
	501	463026	642611	1236.24					1.51912e+06	2.1083e+06	4055.89
	502	463026	642611	1236.16					1.51911e+06	2.10831e+06	4055.66
	503	463025	642612	1236.12					1.51911e+06	2.10831e+06	4055.52
	504	463027	642612	1236.27					1.51912e+06	2.10831e+06	4056.01
	505	463027	642612	1236.38					1.51912e+06	2.10831e+06	4056.36
22	506	463032	642610	1236.02					1.51913e+06	2.1083e+06	4055.18
	507	463032	642610	1236.19					1.51914e+06	2.1083e+06	4055.74
	508	463033	642611	1236.25					1.51914e+06	2.1083e+06	4055.94
	509	463034	642611	1236.34					1.51914e+06	2.1083e+06	4056.24
	510	463034	642611	1236.36					1.51914e+06	2.1083e+06	4056.29
	511	463034	642611	1236.36					1.51914e+06	2.1083e+06	4056.31
	512	463035	642611	1236.33					1.51914e+06	2.1083e+06	4056.2
	513	463035	642610	1236.09					1.51914e+06	2.1083e+06	4055.41
	514	463035	642610	1236.03					1.51914e+06	2.1083e+06	4055.23
	515	463034	642610	1236.02					1.51914e+06	2.1083e+06	4055.17
	516	463034	642610	1235.99					1.51914e+06	2.1083e+06	4055.08
	517	463033	642609	1235.91					1.51914e+06	2.1083e+06	4054.81
	518	463033	642609	1235.76					1.51914e+06	2.1083e+06	4054.34
	519	463032	642609	1235.73					1.51913e+06	2.1083e+06	4054.22
	520	463032	642610	1235.77					1.51913e+06	2.1083e+06	4054.37
23	521	463041	642614	1236.75					1.51916e+06	2.10831e+06	4057.57
	522	463041	642614	1236.9					1.51916e+06	2.10831e+06	4058.07
	523	463042	642614	1237					1.51917e+06	2.10831e+06	4058.39
	524	463042	642614	1237.05					1.51917e+06	2.10831e+06	4058.55
	525	463043	642614	1236.9					1.51917e+06	2.10831e+06	4058.08
	526	463043	642613	1236.69					1.51917e+06	2.10831e+06	4057.4
	527	463043	642613	1236.49					1.51917e+06	2.10831e+06	4056.72
	528	463042	642613	1236.4					1.51917e+06	2.10831e+06	4056.45
	529	463042	642613	1236.65					1.51917e+06	2.10831e+06	4057.24
	530	463041	642614	1236.75					1.51916e+06	2.10831e+06	4057.59
	531	463041	642614	1236.68					1.51916e+06	2.10831e+06	4057.34
24	532	463044	642614	1236.97					1.51917e+06	2.10832e+06	4058.31
	533	463044	642615	1236.91					1.51917e+06	2.10832e+06	4058.12
	534	463044	642614	1236.86					1.51917e+06	2.10832e+06	4057.95
	535	463045	642615	1236.62					1.51918e+06	2.10832e+06	4057.15
	536	463046	642614	1236.46					1.51918e+06	2.10832e+06	4056.63
	537	463046	642614	1236.43					1.51918e+06	2.10831e+06	4056.52
	538	463047	642614	1236.26					1.51918e+06	2.10831e+06	4055.98
	539	463046	642614	1236.39					1.51918e+06	2.10831e+06	4056.4
	540	463045	642614	1236.59					1.51918e+06	2.10831e+06	4057.05
	541	463045	642614	1236.79					1.51918e+06	2.10831e+06	4057.72
	542	463044	642614	1236.86					1.51917e+06	2.10831e+06	4057.94
	543	463044	642614	1236.91					1.51917e+06	2.10831e+06	4058.1
25	544	463036	642608	1235.43					1.51915e+06	2.10829e+06	4053.24
	545	463037	642608	1235.59					1.51915e+06	2.10829e+06	4053.76
	546	463038	642608	1235.63					1.51915e+06	2.10829e+06	4053.91
	547	463038	642608	1235.5					1.51915e+06	2.10829e+06	4053.48
	548	463039	642608	1235.38					1.51916e+06	2.10829e+06	4053.1
	549	463039	642608	1235.3					1.51916e+06	2.10829e+06	4052.82
	550	463039	642607	1235.27					1.51916e+06	2.10829e+06	4052.73
	551	463039	642607	1235.27					1.51916e+06	2.10829e+06	4052.72
	552	463038	642607	1235.35					1.51915e+06	2.10829e+06	4053
	553	463038	642607	1235.35					1.51915e+06	2.10829e+06	4052.98
	554	463037	642607	1235.34					1.51915e+06	2.10829e+06	4052.95
	555	463037	642607	1235.24					1.51915e+06	2.10829e+06	4052.62
	556	463036	642607	1235.25					1.51915e+06	2.10829e+06	4052.66
	557	463036	642608	1235.35					1.51915e+06	2.10829e+06	4052.97
26	558	463039	642607	1235.04					1.51916e+06	2.10829e+06	4051.97
	559	463040	642607	1235.07					1.51916e+06	2.10829e+06	4052.06
	560	463040	642607	1235.11					1.51916e+06	2.10829e+06	4052.21
	561	463041	642607	1235.23					1.51916e+06	2.10829e+06	4052.58
	562	463042	642607	1235.2					1.51917e+06	2.10829e+06	4052.5
	563	463043	642607	1235.25					1.51917e+06	2.10829e+06	4052.65
	564	463043	642607	1235.33					1.51917e+06	2.10829e+06	4052.92
	565	463044	642607	1235.38					1.51917e+06	2.10829e+06	4053.1
	566	463045	642607	1235.52					1.51918e+06	2.10829e+06	4053.53
	567	463045	642607	1235.49					1.51918e+06	2.10829e+06	4053.45
	568	463046	642606	1235.35					1.51918e+06	2.10829e+06	4052.97
	569	463046	642606	1235.27					1.51918e+06	2.10829e+06	4052.71
	570	463047	642606	1235.21					1.51918e+06	2.10829e+06	4052.54
	571	463047	642606	1234.99					1.51918e+06	2.10829e+06	4051.81
	572	463048	642606	1234.81					1.51919e+06	2.10829e+06	4051.2
	573	463048	642606	1234.7					1.51919e+06	2.10829e+06	4050.86
	574	463049	642606	1234.81					1.51919e+06	2.10829e+06	4051.23
	575	463050	642606	1234.88					1.51919e+06	2.10829e+06	4051.44
	576	463050	642605	1234.81					1.51919e+06	2.10829e+06	4051.22
	577	463049	642605	1234.7					1.51919e+06	2.10829e+06	4050.86
	578	463049	642606	1234.68					1.51919e+06	2.10829e+06	4050.79
	579	463048	642606	1234.6					1.51919e+06	2.10829e+06	4050.51
	580	463048	642606	1234.62					1.51919e+06	2.10829e+06	4050.58
	581	463047	642606	1234.72					1.51918e+06	2.10829e+06	4050.93
	582	463047	642606	1234.89					1.51918e+06	2.10829e+06	4051.46
	583	463046	642606	1234.97					1.51918e+06	2.10829e+06	4051.73
	584	463046	642606	1235.06					1.51918e+06	2.10829e+06	4052.04
	585	463045	642606	1234.98					1.51918e+06	2.10829e+06	4051.77
	586	463044	642606	1234.98					1.51917e+06	2.10829e+06	4051.76
	587	463044	642606	1235.01					1.51917e+06	2.10829e+06	4051.88
	588	463043	642606	1235.03					1.51917e+06	2.10829e+06	4051.92
	589	463042	642606	1234.95					1.51917e+06	2.10829e+06	4051.68
	590	463042	642607	1235					1.51917e+06	2.10829e+06	4051.85
	591	463041	642607	1234.98					1.51916e+06	2.10829e+06	4051.76
	592	463040	642607	1234.86					1.51916e+06	2.10829e+06	4051.37
	593	463040	642607	1234.9					1.51916e+06	2.10829e+06	4051.51
27	594	463054	642604	1235.29					1.5192e+06	2.10828e+06	4052.8
	595	463054	642605	1235.26					1.5192e+06	2.10828e+06	4052.68
	596	463054	642605	1235.45					1.51921e+06	2.10828e+06	4053.32
	597	463055	642605	1235.59					1.51921e+06	2.10828e+06	4053.78
	598	463055	642605	1235.69					1.51921e+06	2.10828e+06	4054.11
	599	463056	642604	1235.82					1.51921e+06	2.10828e+06	4054.54
	600	463057	642604	1236					1.51921e+06	2.10828e+06	4055.12
	601	463057	642604	1236.16					1.51922e+06	2.10828e+06	4055.63
	602	463058	642604	1236.28					1.51922e+06	2.10828e+06	4056.03
	603	463059	642604	1236.43					1.51922e+06	2.10828e+06	4056.53
	604	463060	642603	1236.59					1.51922e+06	2.10828e+06	4057.05
	605	463060	642603	1236.72					1.51923e+06	2.10828e+06	4057.48
	606	463061	642603	1236.81					1.51923e+06	2.10828e+06	4057.77
	607	463062	642603	1237.07					1.51923e+06	2.10828e+06	4058.63
	608	463063	642602	1237.17					1.51923e+06	2.10828e+06	4058.97
	609	463063	642603	1237.3					1.51924e+06	2.10828e+06	4059.39
	610	463064	642603	1237.29					1.51924e+06	2.10828e+06	4059.36
	611	463065	642603	1237.42					1.51924e+06	2.10828e+06	4059.78
	612	463067	642603	1237.57					1.51925e+06	2.10828e+06	4060.26
	613	463067	642603	1237.6					1.51925e+06	2.10828e+06	4060.37
	614	463068	642604	1237.64					1.51925e+06	2.10828e+06	4060.5
	615	463068	642604	1237.75					1.51925e+06	2.10828e+06	4060.87
	616	463069	642604	1237.71					1.51925e+06	2.10828e+06	4060.72
	617	463069	642605	1237.38					1.51926e+06	2.10828e+06	4059.66
	618	463070	642604	1237.29					1.51926e+06	2.10828e+06	4059.35
	619	463070	642604	1237.04					1.51926e+06	2.10828e+06	4058.54
	620	463070	642604	1236.91					1.51926e+06	2.10828e+06	4058.11
	621	463070	642604	1236.9					1.51926e+06	2.10828e+06	4058.06
	622	463069	642603	1236.99					1.51925e+06	2.10828e+06	4058.38
	623	463068	642603	1236.9					1.51925e+06	2.10828e+06	4058.06
	624	463068	642602	1236.76					1.51925e+06	2.10828e+06	4057.6
	625	463068	642602	1236.89					1.51925e+06	2.10828e+06	4058.02
	626	463067	642602	1236.85					1.51925e+06	2.10827e+06	4057.91
	627	463066	642602	1236.89					1.51925e+06	2.10827e+06	4058.03
	628	463066	642602	1236.93					1.51925e+06	2.10827e+06	4058.18
	629	463066	642602	1236.91					1.51924e+06	2.10827e+06	4058.11
	630	463065	642602	1236.92					1.51924e+06	2.10827e+06	4058.12
	631	463064	642602	1236.78					1.51924e+06	2.10827e+06	4057.68
	632	463064	642601	1236.59					1.51924e+06	2.10827e+06	4057.05
	633	463064	642601	1236.44					1.51924e+06	2.10827e+06	4056.57
	634	463063	642601	1236.63					1.51924e+06	2.10827e+06	4057.18
	635	463062	642601	1236.53					1.51923e+06	2.10827e+06	4056.86
	636	463062	642601	1236.53					1.51923e+06	2.10827e+06	4056.84
	637	463061	642601	1236.34					1.51923e+06	2.10827e+06	4056.23
	638	463061	642602	1236.18					1.51923e+06	2.10827e+06	4055.71
	639	463060	642602	1236.07					1.51923e+06	2.10827e+06	4055.34
	640	463059	642602	1235.96					1.51922e+06	2.10827e+06	4054.99
	641	463059	642602	1235.85					1.51922e+06	2.10828e+06	4054.62
	642	463058	642602	1235.74					1.51922e+06	2.10827e+06	4054.28
	643	463058	642602	1235.5					1.51922e+06	2.10827e+06	4053.49
	644	463057	642602	1235.44					1.51922e+06	2.10828e+06	4053.28
	645	463057	642603	1235.48					1.51922e+06	2.10828e+06	4053.41
	646	463056	642603	1235.35					1.51921e+06	2.10828e+06	4052.99
	647	463056	642603	1235.26					1.51921e+06	2.10828e+06	4052.69
	648	463055	642603	1235.2					1.51921e+06	2.10828e+06	4052.49
	649	463055	642603	1235.03					1.51921e+06	2.10828e+06	4051.93
	650	463054	642603	1235.02					1.51921e+06	2.10828e+06	4051.9
	651	463053	642603	1234.83					1.5192e+06	2.10828e+06	4051.27
	652	463053	642603	1234.69					1.5192e+06	2.10828e+06	4050.82
	653	463052	642602	1234.55					1.5192e+06	2.10828e+06	4050.36
	654	463052	642602	1234.32					1.5192e+06	2.10827e+06	4049.61
	655	463051	642602	1234.22					1.5192e+06	2.10828e+06	4049.28
	656	463051	642602	1234.33					1.5192e+06	2.10828e+06	4049.65
	657	463050	642602	1234.31					1.51919e+06	2.10828e+06	4049.57
	658	463050	642603	1234.26					1.51919e+06	2.10828e+06	4049.42
	659	463050	642603	1234.2					1.51919e+06	2.10828e+06	4049.21
	660	463050	642603	1234.32					1.51919e+06	2.10828e+06	4049.62
	661	463050	642603	1234.42					1.51919e+06	2.10828e+06	4049.93
	662	463051	642603	1234.56					1.5192e+06	2.10828e+06	4050.4
	663	463052	642603	1234.67					1.5192e+06	2.10828e+06	4050.76
	664	463052	642603	1234.89					1.5192e+06	2.10828e+06	4051.46
	665	463053	642604	1235.03					1.5192e+06	2.10828e+06	4051.94
	666	463053	642604	1235.1					1.5192e+06	2.10828e+06	4052.17
	667	463053	642604	1235.21					1.5192e+06	2.10828e+06	4052.52
28	668	463073	642604	1236.82					1.51927e+06	2.10828e+06	4057.82
	669	463074	642604	1236.84					1.51927e+06	2.10828e+06	4057.89
	670	463074	642603	1236.77					1.51927e+06	2.10828e+06	4057.64
	671	463075	642603	1236.66					1.51927e+06	2.10828e+06	4057.28
	672	463075	642603	1236.53					1.51927e+06	2.10828e+06	4056.85
	673	463075	642603	1236.38					1.51927e+06	2.10828e+06	4056.36
	674	463074	642603	1236.3					1.51927e+06	2.10828e+06	4056.1
	675	463074	642603	1236.24					1.51927e+06	2.10828e+06	4055.9
	676	463074	642603	1236.34					1.51927e+06	2.10828e+06	4056.24
	677	463074	642603	1236.4					1.51927e+06	2.10828e+06	4056.43
	678	463073	642603	1236.41					1.51927e+06	2.10828e+06	4056.46
	679	463073	642603	1236.35					1.51927e+06	2.10828e+06	4056.27
	680	463072	642603	1236.32					1.51927e+06	2.10828e+06	4056.16
	681	463072	642603	1236.42					1.51927e+06	2.10828e+06	4056.5
	682	463072	642604	1236.61					1.51927e+06	2.10828e+06	4057.12
	683	463072	642604	1236.84					1.51927e+06	2.10828e+06	4057.87
	684	463072	642604	1236.92					1.51926e+06	2.10828e+06	4058.14
	685	463071	642604	1236.97					1.51926e+06	2.10828e+06	4058.29
	686	463072	642604	1237.03					1.51926e+06	2.10828e+06	4058.5
	687	463072	642604	1237.09					1.51926e+06	2.10828e+06	4058.69
	688	463072	642604	1236.94					1.51927e+06	2.10828e+06	4058.2
	689	463073	642604	1236.95					1.51927e+06	2.10828e+06	4058.24
	690	463073	642604	1236.88					1.51927e+06	2.10828e+06	4058.01
29	801	463088	642599	1236.15					1.51932e+06	2.10826e+06	4055.62
	802	463088	642599	1235.96					1.51932e+06	2.10826e+06	4054.98
	803	463087	642599	1235.84					1.51931e+06	2.10826e+06	4054.58
	804	463087	642599	1236.08					1.51932e+06	2.10826e+06	4055.39
	805	463088	642599	1236.3					1.51932e+06	2.10826e+06	4056.09
	806	463089	642599	1236.56					1.51932e+06	2.10826e+06	4056.95
	807	463089	642599	1236.61					1.51932e+06	2.10826e+06	4057.12
	808	463090	642599	1236.47					1.51932e+06	2.10826e+06	4056.65
	809	463089	642599	1236.32					1.51932e+06	2.10826e+06	4056.16
	810	463089	642599	1236.23					1.51932e+06	2.10826e+06	4055.88
30	811	463102	642597	1239.73					1.51936e+06	2.10826e+06	4067.35
	812	463103	642598	1240.03					1.51937e+06	2.10826e+06	4068.34
	813	463104	642598	1240.12					1.51937e+06	2.10826e+06	4068.64
	814	463105	642597	1240.25					1.51937e+06	2.10826e+06	4069.05
	815	463107	642597	1240.57					1.51938e+06	2.10826e+06	4070.13
	816	463108	642597	1240.7					1.51938e+06	2.10826e+06	4070.52
	817	463108	642598	1240.93					1.51938e+06	2.10826e+06	4071.3
	818	463109	642597	1240.94					1.51939e+06	2.10826e+06	4071.31
	819	463110	642597	1240.73					1.51939e+06	2.10826e+06	4070.65
	820	463111	642597	1240.35					1.51939e+06	2.10826e+06	4069.4
	821	463111	642596	1239.99					1.51939e+06	2.10826e+06	4068.2
	822	463111	642596	1240.04					1.51939e+06	2.10826e+06	4068.38
	823	463109	642596	1240.22					1.51939e+06	2.10826e+06	4068.97
	824	463108	642597	1240.17					1.51938e+06	2.10826e+06	4068.8
	825	463107	642597	1239.98					1.51938e+06	2.10826e+06	4068.18
	826	463106	642597	1239.94					1.51938e+06	2.10826e+06	4068.05
	827	463105	642597	1239.84					1.51937e+06	2.10826e+06	4067.72
	828	463103	642597	1239.61					1.51937e+06	2.10826e+06	4066.96
	829	463102	642597	1239.43					1.51936e+06	2.10826e+06	4066.36
	830	463102	642597	1239.23					1.51936e+06	2.10826e+06	4065.71
	831	463100	642597	1239.01					1.51936e+06	2.10826e+06	4065
	832	463101	642597	1239.45					1.51936e+06	2.10826e+06	4066.43
31	833	463114	642596	1239.62					1.5194e+06	2.10825e+06	4067
	834	463114	642596	1239.63					1.5194e+06	2.10825e+06	4067.03
	835	463115	642596	1239.47					1.51941e+06	2.10825e+06	4066.49
	836	463116	642595	1239.14					1.51941e+06	2.10825e+06	4065.41
	837	463116	642595	1239.05					1.51941e+06	2.10825e+06	4065.11
	838	463115	642595	1239.18					1.51941e+06	2.10825e+06	4065.55
	839	463115	642595	1239.21					1.51941e+06	2.10825e+06	4065.64
	840	463114	642595	1239.23					1.5194e+06	2.10825e+06	4065.7
	841	463113	642596	1239.46					1.5194e+06	2.10825e+06	4066.46
32	842	463118	642594	1238.77					1.51942e+06	2.10825e+06	4064.21
	843	463119	642595	1238.91					1.51942e+06	2.10825e+06	4064.67
	844	463121	642594	1238.91					1.51943e+06	2.10825e+06	4064.67
	845	463123	642593	1238.85					1.51943e+06	2.10824e+06	4064.47
	846	463125	642592	1238.72					1.51944e+06	2.10824e+06	4064.04
	847	463127	642591	1238.6					1.51944e+06	2.10824e+06	4063.65
	848	463130	642591	1238.62					1.51945e+06	2.10824e+06	4063.7
	849	463130	642590	1238.46					1.51946e+06	2.10824e+06	4063.18
	850	463130	642590	1238.25					1.51945e+06	2.10824e+06	4062.51
	851	463127	642591	1238.24					1.51945e+06	2.10824e+06	4062.48
	852	463126	642591	1238.36					1.51944e+06	2.10824e+06	4062.85
	853	463125	642592	1238.42					1.51944e+06	2.10824e+06	4063.04
	854	463123	642593	1238.6					1.51943e+06	2.10824e+06	4063.64
	855	463121	642594	1238.68					1.51943e+06	2.10825e+06	4063.92
	856	463120	642594	1238.71					1.51942e+06	2.10825e+06	4063.99
	857	463119	642594	1238.64					1.51942e+06	2.10825e+06	4063.79
	858	463118	642594	1238.64					1.51942e+06	2.10825e+06	4063.78
33	859	463136	642588	1238.4					1.51947e+06	2.10823e+06	4063
	860	463136	642589	1238.62					1.51948e+06	2.10823e+06	4063.7
	861	463137	642589	1238.76					1.51948e+06	2.10823e+06	4064.18
	862	463138	642588	1238.84					1.51948e+06	2.10823e+06	4064.43
	863	463139	642588	1239.15					1.51948e+06	2.10823e+06	4065.45
	864	463139	642588	1239					1.51949e+06	2.10823e+06	4064.95
	865	463139	642588	1238.75					1.51949e+06	2.10823e+06	4064.14
	866	463139	642588	1238.46					1.51948e+06	2.10823e+06	4063.19
	867	463138	642588	1238.34					1.51948e+06	2.10823e+06	4062.81
	868	463137	642588	1238.42					1.51948e+06	2.10823e+06	4063.07
	869	463137	642588	1238.39					1.51948e+06	2.10823e+06	4062.95
	870	463136	642588	1238.29					1.51948e+06	2.10823e+06	4062.62
	871	463136	642588	1238.22					1.51947e+06	2.10823e+06	4062.41
	872	463135	642588	1238.32					1.51947e+06	2.10823e+06	4062.72
34	873	463143	642588	1239.12					1.5195e+06	2.10823e+06	4065.36
	874	463144	642588	1239.27					1.5195e+06	2.10823e+06	4065.85
	875	463145	642588	1239.26					1.5195e+06	2.10823e+06	4065.83
	876	463145	642587	1239.26					1.51951e+06	2.10823e+06	4065.82
	877	463145	642587	1239.16					1.51951e+06	2.10823e+06	4065.47
	878	463145	642587	1239.1					1.5195e+06	2.10823e+06	4065.3
	879	463144	642587	1239					1.5195e+06	2.10823e+06	4064.96
	880	463144	642587	1238.96					1.5195e+06	2.10823e+06	4064.83
	881	463143	642588	1238.97					1.5195e+06	2.10823e+06	4064.85
	882	463143	642588	1239.03					1.5195e+06	2.10823e+06	4065.05
35	883	463154	642587	1241.53					1.51954e+06	2.10823e+06	4073.25
	884	463155	642587	1241.73					1.51954e+06	2.10823e+06	4073.91
	885	463156	642587	1241.79					1.51954e+06	2.10823e+06	4074.1
	886	463157	642587	1241.84					1.51954e+06	2.10822e+06	4074.27
	887	463157	642586	1241.77					1.51954e+06	2.10822e+06	4074.04
	888	463156	642586	1241.61					1.51954e+06	2.10822e+06	4073.53
	889	463156	642586	1241.63					1.51954e+06	2.10822e+06	4073.59
	890	463155	642586	1241.51					1.51954e+06	2.10822e+06	4073.21
	891	463154	642587	1241.46					1.51953e+06	2.10823e+06	4073.03
36	892	463158	642582	1240.8					1.51955e+06	2.10821e+06	4070.87
	893	463158	642581	1240.82					1.51955e+06	2.10821e+06	4070.92
	894	463158	642581	1240.6					1.51955e+06	2.1082e+06	4070.19
	895	463159	642580	1240.33					1.51955e+06	2.1082e+06	4069.33
	896	463159	642579	1240.15					1.51955e+06	2.1082e+06	4068.74
	897	463160	642579	1239.78					1.51955e+06	2.1082e+06	4067.51
	898	463160	642578	1239.24					1.51955e+06	2.1082e+06	4065.75
	899	463159	642578	1239.04					1.51955e+06	2.10819e+06	4065.08
	900	463159	642578	1239.18					1.51955e+06	2.1082e+06	4065.54
	901	463158	642578	1239.43					1.51955e+06	2.1082e+06	4066.37
	902	463158	642579	1239.89					1.51955e+06	2.1082e+06	4067.89
	903	463158	642580	1240.15					1.51955e+06	2.1082e+06	4068.72
	904	463157	642581	1240.47					1.51955e+06	2.1082e+06	4069.79
	905	463158	642581	1240.68					1.51955e+06	2.10821e+06	4070.47
37	906	463161	642581	1240.32					1.51956e+06	2.1082e+06	4069.3
	907	463162	642581	1240.59					1.51956e+06	2.10821e+06	4070.18
	908	463163	642581	1240.81					1.51956e+06	2.10821e+06	4070.9
	909	463163	642582	1241					1.51956e+06	2.10821e+06	4071.53
	910	463164	642582	1241.09					1.51957e+06	2.10821e+06	4071.81
	911	463165	642582	1240.87					1.51957e+06	2.10821e+06	4071.1
	912	463165	642582	1240.64					1.51957e+06	2.10821e+06	4070.34
	913	463164	642581	1240.44					1.51957e+06	2.10821e+06	4069.69
	914	463164	642581	1240.43					1.51957e+06	2.10821e+06	4069.66
	915	463163	642581	1240.4					1.51956e+06	2.1082e+06	4069.55
	916	463163	642580	1240.15					1.51956e+06	2.1082e+06	4068.72
	917	463163	642579	1239.83					1.51956e+06	2.1082e+06	4067.68
	918	463162	642579	1239.49					1.51956e+06	2.1082e+06	4066.57
	919	463162	642579	1239.49					1.51956e+06	2.1082e+06	4066.57
	920	463162	642580	1239.91					1.51956e+06	2.1082e+06	4067.95
	921	463162	642580	1240.08					1.51956e+06	2.1082e+06	4068.5
38	922	463164	642588	1242.11					1.51957e+06	2.10823e+06	4075.17
	923	463165	642588	1242.19					1.51957e+06	2.10823e+06	4075.41
	924	463166	642589	1242.25					1.51957e+06	2.10823e+06	4075.62
	925	463168	642589	1242.19					1.51958e+06	2.10823e+06	4075.43
	926	463169	642589	1242.1					1.51958e+06	2.10823e+06	4075.12
	927	463169	642588	1242.13					1.51958e+06	2.10823e+06	4075.23
	928	463168	642587	1242.13					1.51958e+06	2.10823e+06	4075.24
	929	463167	642587	1242.07					1.51958e+06	2.10823e+06	4075.03
	930	463165	642587	1242.03					1.51957e+06	2.10823e+06	4074.91
	931	463164	642587	1242.04					1.51957e+06	2.10822e+06	4074.94
	932	463163	642587	1242.1					1.51956e+06	2.10823e+06	4075.12
	933	463163	642588	1242.15					1.51957e+06	2.10823e+06	4075.3
39	934	463179	642585	1241.53					1.51962e+06	2.10822e+06	4073.26
	935	463180	642585	1241.48					1.51962e+06	2.10822e+06	4073.09
	936	463181	642585	1241.38					1.51962e+06	2.10822e+06	4072.76
	937	463183	642584	1241.25					1.51963e+06	2.10822e+06	4072.33
	938	463184	642584	1241.15					1.51963e+06	2.10822e+06	4072.03
	939	463186	642584	1240.93					1.51964e+06	2.10822e+06	4071.28
	940	463186	642583	1240.85					1.51964e+06	2.10821e+06	4071.03
	941	463186	642583	1240.77					1.51964e+06	2.10821e+06	4070.75
	942	463184	642583	1240.98					1.51963e+06	2.10821e+06	4071.46
	943	463183	642583	1241.18					1.51963e+06	2.10821e+06	4072.1
	944	463182	642583	1241.22					1.51963e+06	2.10821e+06	4072.23
	945	463181	642584	1241.21					1.51962e+06	2.10821e+06	4072.21
	946	463179	642584	1241.37					1.51962e+06	2.10821e+06	4072.74
	947	463178	642584	1241.4					1.51961e+06	2.10822e+06	4072.82
	948	463177	642584	1241.46					1.51961e+06	2.10822e+06	4073.04
	949	463176	642585	1241.54					1.51961e+06	2.10822e+06	4073.29
	950	463178	642585	1241.53					1.51961e+06	2.10822e+06	4073.27
	951	463179	642585	1241.53					1.51962e+06	2.10822e+06	4073.25
40	952	463197	642581	1239.91					1.51967e+06	2.1082e+06	4067.95
	953	463198	642581	1239.84					1.51968e+06	2.10821e+06	4067.71
	954	463199	642581	1239.78					1.51968e+06	2.1082e+06	4067.53
	955	463201	642581	1239.72					1.51969e+06	2.1082e+06	4067.32
	956	463202	642581	1239.47					1.51969e+06	2.1082e+06	4066.49
	957	463203	642581	1239.31					1.5197e+06	2.1082e+06	4065.97
	958	463204	642580	1239.2					1.5197e+06	2.1082e+06	4065.63
	959	463203	642579	1239.29					1.51969e+06	2.1082e+06	4065.9
	960	463202	642579	1239.31					1.51969e+06	2.1082e+06	4065.99
	961	463201	642579	1239.36					1.51969e+06	2.1082e+06	4066.13
	962	463200	642579	1239.55					1.51969e+06	2.1082e+06	4066.75
	963	463199	642579	1239.69					1.51968e+06	2.1082e+06	4067.23
	964	463198	642579	1239.81					1.51968e+06	2.1082e+06	4067.63
	965	463197	642579	1239.82					1.51967e+06	2.1082e+06	4067.67
	966	463196	642580	1239.83					1.51967e+06	2.1082e+06	4067.68
	967	463195	642580	1239.77					1.51967e+06	2.1082e+06	4067.5
	968	463195	642581	1239.9					1.51967e+06	2.1082e+06	4067.93
	969	463196	642581	1239.89					1.51967e+06	2.1082e+06	4067.89
41	970	463206	642578	1238.78					1.51971e+06	2.1082e+06	4064.24
	971	463207	642578	1238.97					1.51971e+06	2.1082e+06	4064.86
	972	463208	642579	1238.94					1.51971e+06	2.1082e+06	4064.75
	973	463209	642579	1238.96					1.51971e+06	2.1082e+06	4064.81
	974	463209	642578	1238.8					1.51972e+06	2.1082e+06	4064.31
	975	463209	642577	1238.65					1.51972e+06	2.10819e+06	4063.82
	976	463209	642577	1238.66					1.51971e+06	2.10819e+06	4063.86
	977	463208	642577	1238.43					1.51971e+06	2.10819e+06	4063.09
	978	463207	642577	1238.45					1.51971e+06	2.10819e+06	4063.17
	979	463206	642577	1238.66					1.51971e+06	2.10819e+06	4063.84
42	980	463216	642579	1238.91					1.51974e+06	2.1082e+06	4064.66
	981	463215	642580	1238.9					1.51974e+06	2.1082e+06	4064.64
	982	463215	642581	1238.54					1.51973e+06	2.10821e+06	4063.46
	983	463214	642582	1238.23					1.51973e+06	2.10821e+06	4062.44
	984	463215	642583	1237.75					1.51973e+06	2.10821e+06	4060.85
	985	463216	642585	1236.66					1.51974e+06	2.10822e+06	4057.28
	986	463217	642585	1236.28					1.51974e+06	2.10822e+06	4056.04
	987	463218	642586	1235.65					1.51974e+06	2.10822e+06	4053.98
	988	463219	642587	1235.35					1.51975e+06	2.10822e+06	4052.97
	989	463220	642587	1235.24					1.51975e+06	2.10822e+06	4052.61
	990	463221	642587	1235					1.51975e+06	2.10822e+06	4051.84
	991	463223	642586	1234.91					1.51976e+06	2.10822e+06	4051.55
	992	463223	642586	1234.37					1.51976e+06	2.10822e+06	4049.77
	993	463224	642585	1234.32					1.51976e+06	2.10822e+06	4049.62
	994	463226	642584	1233.81					1.51977e+06	2.10821e+06	4047.92
	995	463226	642582	1234.58					1.51977e+06	2.10821e+06	4050.45
	996	463227	642581	1234.65					1.51977e+06	2.10821e+06	4050.7
	997	463226	642580	1235.59					1.51977e+06	2.1082e+06	4053.78
	998	463222	642581	1237.42					1.51976e+06	2.1082e+06	4059.77
	999	463221	642581	1237.86					1.51975e+06	2.1082e+06	4061.21
	1000	463218	642579	1238.53					1.51975e+06	2.1082e+06	4063.41
	1001	463218	642579	1238.82					1.51974e+06	2.1082e+06	4064.36
	1002	463217	642579	1238.94					1.51974e+06	2.1082e+06	4064.75
43	1003	463244	642577	1232.6					1.51983e+06	2.10819e+06	4043.95
	1004	463242	642576	1233.66					1.51982e+06	2.10819e+06	4047.43
	1005	463241	642576	1233.66					1.51982e+06	2.10819e+06	4047.43
	1006	463241	642577	1233.14					1.51982e+06	2.10819e+06	4045.73
	1007	463243	642577	1232.46					1.51983e+06	2.10819e+06	4043.49
	1008	463244	642578	1231.59					1.51983e+06	2.1082e+06	4040.65
	1009	463245	642579	1231.03					1.51983e+06	2.1082e+06	4038.8
	1010	463246	642578	1231.14					1.51984e+06	2.1082e+06	4039.17
	1011	463245	642578	1232.04					1.51983e+06	2.10819e+06	4042.12
44	1012	463249	642573	1233.16					1.51985e+06	2.10818e+06	4045.79
	1013	463250	642575	1232.52					1.51985e+06	2.10818e+06	4043.71
	1014	463252	642576	1231.71					1.51985e+06	2.10819e+06	4041.03
	1015	463253	642577	1230.83					1.51986e+06	2.10819e+06	4038.15
	1016	463255	642578	1230.05					1.51986e+06	2.1082e+06	4035.6
	1017	463256	642579	1229.35					1.51987e+06	2.1082e+06	4033.3
	1018	463257	642580	1228.73					1.51987e+06	2.1082e+06	4031.28
	1019	463258	642581	1228.21					1.51988e+06	2.1082e+06	4029.55
	1020	463260	642581	1227.44					1.51988e+06	2.10821e+06	4027.04
	1021	463261	642579	1228					1.51988e+06	2.1082e+06	4028.86
	1022	463259	642577	1229					1.51988e+06	2.10819e+06	4032.15
	1023	463257	642575	1230.37					1.51987e+06	2.10818e+06	4036.66
	1024	463254	642573	1231.61					1.51986e+06	2.10818e+06	4040.71
	1025	463251	642572	1232.89					1.51985e+06	2.10818e+06	4044.92
45	1026	463269	642573	1226.08					1.51991e+06	2.10818e+06	4022.56
	1027	463270	642574	1225.64					1.51991e+06	2.10818e+06	4021.12
	1028	463271	642575	1225.04					1.51992e+06	2.10819e+06	4019.16
	1029	463272	642576	1224.35					1.51992e+06	2.10819e+06	4016.89
	1030	463273	642577	1223.45					1.51993e+06	2.10819e+06	4013.95
	1031	463275	642578	1222.56					1.51993e+06	2.1082e+06	4011.04
	1032	463276	642580	1221.29					1.51993e+06	2.1082e+06	4006.84
	1033	463278	642581	1220.45					1.51994e+06	2.1082e+06	4004.12
	1034	463282	642582	1218.84					1.51995e+06	2.10821e+06	3998.83
	1035	463280	642579	1220.55					1.51995e+06	2.1082e+06	4004.44
	1036	463277	642577	1222					1.51994e+06	2.10819e+06	4009.19
	1037	463274	642575	1223.72					1.51993e+06	2.10819e+06	4014.82
	1038	463272	642574	1224.55					1.51992e+06	2.10818e+06	4017.55
	1039	463272	642574	1224.81					1.51992e+06	2.10818e+06	4018.39
	1040	463271	642573	1225.32					1.51992e+06	2.10818e+06	4020.07
	1041	463270	642573	1225.81					1.51991e+06	2.10818e+06	4021.67

## Sheet: Sheet2
Injectite #2
Segment #	GPS Point #	Northings (m)	Eastings (m)	Elevation (m)				Northings (ft)	Eastings (ft)	Elevation (ft)
1	23	461828	641867	1278.99				1.51518e+06	2.10586e+06	4196.18
	24	461828	641866	1279.15				1.51518e+06	2.10586e+06	4196.7
	25	461828	641866	1279.56				1.51518e+06	2.10586e+06	4198.03
	26	461828	641866	1279.69				1.51518e+06	2.10586e+06	4198.44
	27	461828	641866	1279.51				1.51518e+06	2.10586e+06	4197.85
	28	461828	641867	1279.23				1.51518e+06	2.10586e+06	4196.94
	29	461828	641867	1278.84				1.51518e+06	2.10586e+06	4195.67
2	30	461829	641865	1279.59				1.51519e+06	2.10586e+06	4198.13
	31	461829	641866	1279.3				1.51519e+06	2.10586e+06	4197.17
	32	461829	641865	1279.42				1.51519e+06	2.10586e+06	4197.56
	33	461829	641865	1279.7				1.51519e+06	2.10586e+06	4198.5
	34	461829	641864	1280.01				1.51519e+06	2.10585e+06	4199.5
	35	461829	641863	1280.61				1.51519e+06	2.10585e+06	4201.49
	36	461829	641864	1280.64				1.51519e+06	2.10585e+06	4201.59
	37	461829	641864	1280.63				1.51519e+06	2.10585e+06	4201.53
	38	461829	641865	1280.21				1.51519e+06	2.10586e+06	4200.15
3	39	461830	641857	1282.83				1.51519e+06	2.10583e+06	4208.74
	40	461830	641856	1282.94				1.51519e+06	2.10583e+06	4209.11
	41	461829	641856	1283.01				1.51519e+06	2.10583e+06	4209.34
	42	461829	641857	1283.01				1.51519e+06	2.10583e+06	4209.34
	43	461829	641857	1282.84				1.51519e+06	2.10583e+06	4208.8
	44	461830	641858	1282.51				1.51519e+06	2.10583e+06	4207.72
	45	461830	641857	1282.51				1.51519e+06	2.10583e+06	4207.71
4	46	461828	641854	1283.74				1.51518e+06	2.10582e+06	4211.74
	47	461829	641854	1283.7				1.51519e+06	2.10582e+06	4211.6
	48	461829	641854	1283.67				1.51519e+06	2.10582e+06	4211.52
	49	461828	641853	1283.76				1.51518e+06	2.10582e+06	4211.82
	50	461828	641854	1283.86				1.51518e+06	2.10582e+06	4212.13
	51	461827	641853	1283.93				1.51518e+06	2.10582e+06	4212.36
	52	461827	641854	1283.75				1.51518e+06	2.10582e+06	4211.78
	53	461827	641855	1283.72				1.51518e+06	2.10582e+06	4211.68
	54	461827	641855	1283.62				1.51518e+06	2.10582e+06	4211.36
	55	461828	641855	1283.62				1.51518e+06	2.10582e+06	4211.35
	56	461828	641855	1283.67				1.51518e+06	2.10582e+06	4211.52
5	57	461821	641854	1285.11				1.51516e+06	2.10582e+06	4216.23
	58	461822	641854	1285.15				1.51516e+06	2.10582e+06	4216.37
	59	461822	641853	1285.13				1.51516e+06	2.10582e+06	4216.32
	60	461823	641853	1284.99				1.51517e+06	2.10582e+06	4215.86
	61	461823	641853	1284.81				1.51517e+06	2.10582e+06	4215.26
	62	461823	641853	1285.17				1.51517e+06	2.10582e+06	4216.45
	63	461822	641852	1285.4				1.51517e+06	2.10581e+06	4217.19
	64	461822	641852	1285.59				1.51516e+06	2.10581e+06	4217.81
	65	461822	641852	1285.71				1.51516e+06	2.10581e+06	4218.23
	66	461822	641851	1285.8				1.51516e+06	2.10581e+06	4218.5
	67	461822	641851	1285.96				1.51516e+06	2.10581e+06	4219.03
	68	461821	641852	1286.2				1.51516e+06	2.10581e+06	4219.82
	69	461821	641852	1286.3				1.51516e+06	2.10581e+06	4220.15
	70	461821	641852	1286.13				1.51516e+06	2.10581e+06	4219.6
	71	461821	641853	1286.06				1.51516e+06	2.10582e+06	4219.35
	72	461820	641853	1286.08				1.51516e+06	2.10582e+06	4219.43
	73	461820	641853	1286.04				1.51516e+06	2.10582e+06	4219.28
	74	461821	641853	1285.58				1.51516e+06	2.10582e+06	4217.79
	75	461821	641854	1285.3				1.51516e+06	2.10582e+06	4216.87
6	76	461812	641857	1286.54				1.51513e+06	2.10583e+06	4220.92
	77	461811	641856	1286.83				1.51513e+06	2.10583e+06	4221.89
	78	461811	641855	1286.78				1.51513e+06	2.10582e+06	4221.7
	79	461810	641855	1286.95				1.51513e+06	2.10582e+06	4222.29
	80	461810	641856	1287.02				1.51513e+06	2.10583e+06	4222.49
	81	461810	641857	1286.88				1.51513e+06	2.10583e+06	4222.06
	82	461810	641858	1286.63				1.51513e+06	2.10583e+06	4221.22
	83	461811	641858	1286.56				1.51513e+06	2.10583e+06	4220.99
	84	461811	641859	1286.4				1.51513e+06	2.10584e+06	4220.48
	85	461811	641859	1286.27				1.51513e+06	2.10584e+06	4220.03
	86	461812	641859	1286.29				1.51513e+06	2.10584e+06	4220.11
	87	461813	641859	1286.28				1.51513e+06	2.10584e+06	4220.07
	88	461813	641859	1286.09				1.51513e+06	2.10584e+06	4219.44
	89	461812	641858	1286.54				1.51513e+06	2.10583e+06	4220.94
7	91	461806	641855	1287.92				1.51511e+06	2.10582e+06	4225.47
	92	461805	641854	1288.42				1.51511e+06	2.10582e+06	4227.1
	93	461805	641852	1289.08				1.51511e+06	2.10581e+06	4229.27
	94	461805	641851	1289.52				1.51511e+06	2.10581e+06	4230.7
	95	461804	641850	1290.23				1.51511e+06	2.10581e+06	4233.04
	96	461804	641849	1290.54				1.51511e+06	2.1058e+06	4234.06
	97	461804	641848	1291.1				1.5151e+06	2.1058e+06	4235.88
	98	461803	641847	1291.33				1.5151e+06	2.1058e+06	4236.64
	99	461803	641848	1291.29				1.5151e+06	2.1058e+06	4236.53
	100	461803	641848	1291.1				1.5151e+06	2.1058e+06	4235.9
	101	461803	641849	1290.55				1.5151e+06	2.1058e+06	4234.1
	102	461804	641850	1290.13				1.5151e+06	2.10581e+06	4232.72
	103	461804	641851	1289.53				1.51511e+06	2.10581e+06	4230.75
	104	461804	641852	1289.21				1.51511e+06	2.10581e+06	4229.7
	105	461804	641852	1289.06				1.51511e+06	2.10581e+06	4229.21
	106	461805	641854	1288.45				1.51511e+06	2.10582e+06	4227.21
	107	461805	641855	1287.95				1.51511e+06	2.10582e+06	4225.56
	108	461805	641856	1287.68				1.51511e+06	2.10583e+06	4224.67
8	109	461804	641846	1291.53				1.5151e+06	2.10579e+06	4237.29
	110	461804	641845	1291.82				1.51511e+06	2.10579e+06	4238.24
	111	461804	641843	1292.55				1.5151e+06	2.10579e+06	4240.64
	112	461804	641842	1293.13				1.5151e+06	2.10578e+06	4242.54
	113	461803	641842	1293.47				1.5151e+06	2.10578e+06	4243.65
	114	461803	641840	1294.1				1.5151e+06	2.10577e+06	4245.74
	115	461802	641839	1294.54				1.5151e+06	2.10577e+06	4247.19
	116	461802	641839	1294.81				1.5151e+06	2.10577e+06	4248.07
	117	461802	641840	1294.5				1.5151e+06	2.10577e+06	4247.05
	118	461802	641841	1293.8				1.5151e+06	2.10578e+06	4244.76
	119	461802	641842	1293.36				1.5151e+06	2.10578e+06	4243.32
	120	461803	641843	1292.98				1.5151e+06	2.10579e+06	4242.06
	121	461804	641846	1291.76				1.5151e+06	2.10579e+06	4238.06
9	122	461798	641826	1300.48				1.51508e+06	2.10573e+06	4266.66
	123	461797	641824	1301.09				1.51508e+06	2.10572e+06	4268.65
	124	461797	641823	1301.63				1.51508e+06	2.10572e+06	4270.45
	125	461796	641823	1301.93				1.51508e+06	2.10572e+06	4271.43
	126	461796	641822	1302.48				1.51508e+06	2.10572e+06	4273.24
	127	461795	641822	1302.61				1.51508e+06	2.10572e+06	4273.66
	128	461795	641823	1302.19				1.51508e+06	2.10572e+06	4272.26
	129	461796	641824	1301.64				1.51508e+06	2.10572e+06	4270.48
10	130	461787	641805	1309.64				1.51505e+06	2.10566e+06	4296.71
	131	461787	641805	1309.85				1.51505e+06	2.10566e+06	4297.4
	132	461787	641805	1309.78				1.51505e+06	2.10566e+06	4297.19
	133	461787	641806	1309.7				1.51505e+06	2.10566e+06	4296.92
	134	461786	641806	1309.64				1.51505e+06	2.10566e+06	4296.71
	135	461786	641806	1309.37				1.51505e+06	2.10566e+06	4295.83
	136	461787	641806	1309.37				1.51505e+06	2.10566e+06	4295.84
	137	461787	641806	1309.48				1.51505e+06	2.10566e+06	4296.19
11	138	461789	641796	1311.53				1.51505e+06	2.10563e+06	4302.91
	139	461788	641795	1312.09				1.51505e+06	2.10563e+06	4304.74
	140	461788	641794	1312.31				1.51505e+06	2.10562e+06	4305.49
	141	461787	641793	1312.95				1.51505e+06	2.10562e+06	4307.59
	142	461787	641792	1312.95				1.51505e+06	2.10562e+06	4307.57
	143	461787	641791	1313.61				1.51505e+06	2.10561e+06	4309.74
	144	461786	641790	1314.06				1.51505e+06	2.10561e+06	4311.21
	145	461785	641789	1314.85				1.51504e+06	2.10561e+06	4313.82
	146	461785	641788	1315.13				1.51504e+06	2.10561e+06	4314.73
	147	461785	641788	1315.37				1.51504e+06	2.1056e+06	4315.51
	148	461785	641787	1315.39				1.51504e+06	2.1056e+06	4315.58
	149	461785	641787	1315.28				1.51504e+06	2.1056e+06	4315.22
	150	461785	641787	1315.6				1.51504e+06	2.1056e+06	4316.29
	151	461784	641787	1315.78				1.51504e+06	2.1056e+06	4316.85
	152	461784	641788	1315.78				1.51504e+06	2.1056e+06	4316.86
	153	461783	641788	1315.9				1.51504e+06	2.1056e+06	4317.24
	154	461783	641789	1315.58				1.51504e+06	2.10561e+06	4316.21
	155	461784	641790	1315.21				1.51504e+06	2.10561e+06	4315
	156	461784	641791	1314.84				1.51504e+06	2.10561e+06	4313.8
	157	461784	641792	1314.43				1.51504e+06	2.10562e+06	4312.44
	158	461785	641793	1314.15				1.51504e+06	2.10562e+06	4311.52
	159	461785	641793	1313.7				1.51504e+06	2.10562e+06	4310.05
	160	461786	641794	1313.46				1.51504e+06	2.10562e+06	4309.26
	161	461786	641794	1313.07				1.51505e+06	2.10562e+06	4307.98
	162	461787	641796	1312.54				1.51505e+06	2.10563e+06	4306.24
	163	461788	641796	1311.91				1.51505e+06	2.10563e+06	4304.18
	164	461788	641796	1311.67				1.51505e+06	2.10563e+06	4303.37
12	165	461768	641742	1334.21				1.51499e+06	2.10545e+06	4377.33
	166	461769	641742	1333.89				1.51499e+06	2.10545e+06	4376.28
	167	461770	641742	1333.7				1.51499e+06	2.10545e+06	4375.65
	168	461770	641743	1333.13				1.51499e+06	2.10546e+06	4373.8
	169	461770	641743	1333.44				1.51499e+06	2.10546e+06	4374.79
	170	461770	641744	1333.36				1.51499e+06	2.10546e+06	4374.54
	171	461771	641745	1333.25				1.515e+06	2.10546e+06	4374.19
	172	461771	641746	1333.07				1.515e+06	2.10547e+06	4373.58
	173	461771	641749	1332.8				1.515e+06	2.10548e+06	4372.7
	174	461771	641750	1332.63				1.515e+06	2.10548e+06	4372.13
	175	461772	641752	1332.4				1.515e+06	2.10549e+06	4371.39
	176	461772	641753	1331.7				1.515e+06	2.10549e+06	4369.1
	177	461773	641754	1330.49				1.515e+06	2.10549e+06	4365.13
	178	461773	641755	1329.98				1515003	2.1055e+06	4363.46
	179	461773	641757	1329.35				1.515e+06	2.1055e+06	4361.37
	180	461774	641758	1328.9				1.51501e+06	2.1055e+06	4359.9
	181	461774	641759	1328.46				1.51501e+06	2.10551e+06	4358.46
	182	461774	641760	1328.65				1.51501e+06	2.10551e+06	4359.08
	183	461775	641761	1328.08				1.51501e+06	2.10551e+06	4357.23
	184	461775	641761	1327.82				1.51501e+06	2.10551e+06	4356.35
	185	461776	641762	1327.76				1.51501e+06	2.10552e+06	4356.16
	186	461777	641762	1327.2				1.51502e+06	2.10552e+06	4354.34
	187	461777	641763	1326.54				1.51502e+06	2.10552e+06	4352.18
	188	461778	641764	1325.9				1.51502e+06	2.10553e+06	4350.08
	189	461778	641766	1325.35				1.51502e+06	2.10553e+06	4348.26
	190	461779	641767	1324.56				1.51502e+06	2.10554e+06	4345.68
	191	461781	641770	1322.06				1.51503e+06	2.10554e+06	4337.46
	192	461782	641772	1320.94				1.51503e+06	2.10555e+06	4333.79
	193	461782	641775	1319.25				1.51503e+06	2.10556e+06	4328.24
	194	461783	641777	1318.07				1.51504e+06	2.10557e+06	4324.38
	195	461783	641780	1317.5				1.51504e+06	2.10558e+06	4322.51
	196	461784	641782	1316.23				1.51504e+06	2.10558e+06	4318.35
	197	461784	641784	1315.56				1.51504e+06	2.10559e+06	4316.13
	198	461785	641786	1315.53				1.51504e+06	2.1056e+06	4316.05
	199	461784	641787	1315.71				1.51504e+06	2.1056e+06	4316.63
	200	461783	641787	1316.13				1.51504e+06	2.1056e+06	4318.01
	201	461782	641783	1318.2				1.51503e+06	2.10559e+06	4324.8
	202	461781	641782	1318.89				1.51503e+06	2.10558e+06	4327.07
	203	461781	641781	1319.24				1.51503e+06	2.10558e+06	4328.23
	204	461780	641780	1320.22				1.51503e+06	2.10558e+06	4331.43
	205	461779	641777	1321.79				1.51502e+06	2.10557e+06	4336.58
	206	461779	641776	1322.69				1.51502e+06	2.10556e+06	4339.54
	207	461778	641774	1323.45				1.51502e+06	2.10556e+06	4342.04
	208	461778	641773	1323.95				1.51502e+06	2.10556e+06	4343.68
	209	461778	641772	1324.44				1.51502e+06	2.10555e+06	4345.29
	210	461777	641769	1325.8				1.51502e+06	2.10554e+06	4349.75
	211	461775	641767	1326.76				1.51501e+06	2.10554e+06	4352.89
	212	461774	641766	1327.4				1.51501e+06	2.10553e+06	4354.99
	213	461773	641764	1328.51				1.515e+06	2.10552e+06	4358.63
	214	461772	641762	1329.64				1.515e+06	2.10552e+06	4362.35
	215	461771	641759	1330.97				1.515e+06	2.10551e+06	4366.71
	216	461770	641756	1332.67				1.51499e+06	2.1055e+06	4372.29
	217	461770	641754	1332.78				1.51499e+06	2.10549e+06	4372.64
	218	461770	641752	1333.03				1.51499e+06	2.10549e+06	4373.44
	219	461770	641751	1333.27				1.51499e+06	2.10548e+06	4374.23
	220	461769	641750	1333.3				1.51499e+06	2.10548e+06	4374.35
	221	461769	641749	1333.59				1.51499e+06	2.10547e+06	4375.28
	222	461769	641748	1334				1.51499e+06	2.10547e+06	4376.64
	223	461769	641746	1334.39				1.51499e+06	2.10547e+06	4377.9
	224	461768	641746	1334.31				1.51499e+06	2.10546e+06	4377.67
	225	461768	641745	1334.34				1.51499e+06	2.10546e+06	4377.74
	226	461768	641744	1334.43				1.51499e+06	2.10546e+06	4378.04
	227	461768	641742	1334.32				1.51499e+06	2.10545e+06	4377.69
13	228	461770	641732	1336.03				1.51499e+06	2.10542e+06	4383.3
	229	461771	641732	1335.76				1.515e+06	2.10542e+06	4382.43
	230	461773	641732	1335.16				1.515e+06	2.10542e+06	4380.44
	231	461773	641731	1335.58				1.515e+06	2.10542e+06	4381.83
	232	461774	641731	1335.45				1.51501e+06	2.10542e+06	4381.4
	233	461774	641731	1335.47				1.51501e+06	2.10542e+06	4381.47
	234	461774	641729	1335.91				1.51501e+06	2.10541e+06	4382.9
	235	461772	641729	1336.9				1.515e+06	2.10541e+06	4386.16
	236	461772	641728	1337.12				1.515e+06	2.10541e+06	4386.87
	237	461771	641727	1337.5				1.515e+06	2.1054e+06	4388.12
	238	461771	641726	1337.84				1.515e+06	2.1054e+06	4389.25
	239	461770	641725	1337.99				1.51499e+06	2.1054e+06	4389.73
	240	461770	641724	1338.26				1.51499e+06	2.10539e+06	4390.61
	241	461769	641723	1338.4				1.51499e+06	2.10539e+06	4391.07
	242	461768	641724	1338.41				1.51499e+06	2.10539e+06	4391.1
	243	461769	641725	1338.36				1.51499e+06	2.1054e+06	4390.95
	244	461769	641726	1338.26				1.51499e+06	2.1054e+06	4390.63
	245	461769	641727	1338.03				1.51499e+06	2.1054e+06	4389.88
	246	461769	641728	1337.93				1.51499e+06	2.10541e+06	4389.55
	247	461769	641728	1337.76				1.51499e+06	2.10541e+06	4388.96
	248	461769	641729	1337.44				1.51499e+06	2.10541e+06	4387.93
	249	461770	641730	1337.11				1.51499e+06	2.10541e+06	4386.85
	250	461770	641731	1336.69				1.51499e+06	2.10542e+06	4385.46
14	251	461752	641736	1339.55				1.51494e+06	2.10543e+06	4394.85
	252	461753	641737	1339.49				1.51494e+06	2.10544e+06	4394.64
	253	461754	641737	1339.36				1.51494e+06	2.10544e+06	4394.22
	254	461755	641736	1339.39				1.51494e+06	2.10543e+06	4394.33
	255	461756	641737	1339.11				1.51495e+06	2.10544e+06	4393.41
	256	461756	641737	1338.99				1.51495e+06	2.10544e+06	4393
	257	461757	641736	1339.08				1.51495e+06	2.10543e+06	4393.32
	258	461757	641736	1339.3				1.51495e+06	2.10543e+06	4394.02
	259	461756	641735	1339.64				1.51495e+06	2.10543e+06	4395.14
	260	461756	641735	1339.85				1.51495e+06	2.10543e+06	4395.84
	261	461755	641734	1340.35				1.51494e+06	2.10543e+06	4397.47
	262	461754	641734	1340.51				1.51494e+06	2.10543e+06	4397.99
	263	461754	641733	1340.77				1.51494e+06	2.10542e+06	4398.85
	264	461753	641732	1340.88				1.51494e+06	2.10542e+06	4399.21
	265	461753	641732	1341.06				1.51494e+06	2.10542e+06	4399.79
	266	461753	641731	1341.16				1.51494e+06	2.10542e+06	4400.14
	267	461752	641730	1341.49				1.51493e+06	2.10541e+06	4401.23
	268	461752	641729	1341.86				1.51493e+06	2.10541e+06	4402.44
	269	461752	641728	1341.94				1.51493e+06	2.10541e+06	4402.68
	270	461752	641728	1341.99				1.51493e+06	2.10541e+06	4402.85
	271	461751	641727	1342.09				1.51493e+06	2.10541e+06	4403.19
	272	461751	641727	1342.19				1.51493e+06	2.1054e+06	4403.51
	273	461751	641727	1342.29				1.51493e+06	2.1054e+06	4403.85
	274	461750	641728	1342.26				1.51493e+06	2.10541e+06	4403.74
	275	461751	641729	1342.15				1.51493e+06	2.10541e+06	4403.38
	276	461751	641730	1341.73				1.51493e+06	2.10541e+06	4402.01
	277	461752	641731	1341.59				1.51493e+06	2.10542e+06	4401.55
	278	461752	641732	1341.43				1.51493e+06	2.10542e+06	4401.01
	279	461752	641733	1341.22				1.51494e+06	2.10542e+06	4400.33
	280	461752	641733	1340.77				1.51493e+06	2.10542e+06	4398.86
	281	461752	641734	1340.57				1.51494e+06	2.10543e+06	4398.18
	282	461752	641735	1340.12				1.51493e+06	2.10543e+06	4396.72
	283	461752	641736	1339.78				1.51493e+06	2.10543e+06	4395.6
15	284	461764	641722	1339.77				1.51497e+06	2.10539e+06	4395.57
	285	461765	641722	1339.66				1.51498e+06	2.10539e+06	4395.22
	286	461766	641721	1339.61				1.51498e+06	2.10538e+06	4395.05
	287	461766	641721	1339.59				1.51498e+06	2.10538e+06	4394.98
	288	461763	641718	1340.55				1.51497e+06	2.10537e+06	4398.11
	289	461763	641717	1340.45				1.51497e+06	2.10537e+06	4397.8
	290	461762	641716	1340.93				1.51497e+06	2.10537e+06	4399.37
	291	461761	641716	1341.49				1.51496e+06	2.10537e+06	4401.22
	292	461760	641716	1342.07				1.51496e+06	2.10537e+06	4403.13
	293	461758	641716	1342.82				1.51496e+06	2.10537e+06	4405.59
	294	461757	641717	1343.27				1.51495e+06	2.10537e+06	4407.07
	295	461757	641718	1343.27				1.51495e+06	2.10537e+06	4407.07
	296	461757	641718	1343.16				1.51495e+06	2.10537e+06	4406.68
	297	461757	641719	1342.94				1.51495e+06	2.10538e+06	4405.98
	298	461757	641719	1342.67				1.51495e+06	2.10538e+06	4405.09
	299	461758	641720	1342.22				1.51496e+06	2.10538e+06	4403.6
	300	461759	641720	1341.97				1.51496e+06	2.10538e+06	4402.79
	301	461759	641721	1341.51				1.51496e+06	2.10538e+06	4401.28
	302	461759	641722	1341.03				1.51496e+06	2.10539e+06	4399.71
	303	461760	641723	1340.73				1.51496e+06	2.10539e+06	4398.74
	304	461761	641723	1340.49				1.51496e+06	2.10539e+06	4397.92
	305	461762	641724	1339.84				1.51497e+06	2.10539e+06	4395.79
	306	461764	641723	1339.5				1.51497e+06	2.10539e+06	4394.7
	307	461764	641722	1339.72				1.51497e+06	2.10539e+06	4395.41
16	308	461762	641713	1340.7				1.51497e+06	2.10536e+06	4398.61
	309	461762	641712	1340.72				1.51497e+06	2.10536e+06	4398.69
	310	461761	641711	1341.02				1.51496e+06	2.10535e+06	4399.66
	311	461760	641710	1341.3				1.51496e+06	2.10535e+06	4400.6
	312	461758	641709	1342.13				1.51495e+06	2.10535e+06	4403.31
	313	461756	641709	1342.69				1.51495e+06	2.10535e+06	4405.15
	314	461756	641711	1343.08				1.51495e+06	2.10535e+06	4406.44
	315	461757	641712	1343.13				1.51495e+06	2.10536e+06	4406.61
	316	461757	641714	1343.11				1.51495e+06	2.10536e+06	4406.51
	317	461758	641715	1342.69				1.51495e+06	2.10536e+06	4405.15
	318	461759	641714	1342.4				1.51496e+06	2.10536e+06	4404.19
	319	461760	641714	1341.91				1.51496e+06	2.10536e+06	4402.6
	320	461762	641714	1341.05				1.51497e+06	2.10536e+06	4399.78
17	321	461744	641723	1345.28				1.51491e+06	2.10539e+06	4413.64
	322	461744	641723	1345.07				1.51491e+06	2.10539e+06	4412.96
	323	461743	641722	1345.43				1.51491e+06	2.10539e+06	4414.14
	324	461743	641721	1345.44				1.5149e+06	2.10539e+06	4414.18
	325	461742	641721	1345.34				1.5149e+06	2.10538e+06	4413.84
	326	461741	641720	1344.98				1.5149e+06	2.10538e+06	4412.68
	327	461740	641720	1344.92				1.5149e+06	2.10538e+06	4412.47
	328	461739	641719	1344.82				1.51489e+06	2.10538e+06	4412.12
	329	461738	641718	1344.61				1.51489e+06	2.10537e+06	4411.44
	330	461737	641717	1344.32				1.51489e+06	2.10537e+06	4410.49
	331	461737	641717	1344.09				1.51488e+06	2.10537e+06	4409.75
	332	461736	641716	1343.75				1.51488e+06	2.10537e+06	4408.63
	333	461735	641716	1343.51				1.51488e+06	2.10537e+06	4407.84
	334	461736	641717	1343.54				1.51488e+06	2.10537e+06	4407.95
	335	461736	641718	1343.57				1.51488e+06	2.10537e+06	4408.04
	336	461736	641719	1343.65				1.51488e+06	2.10538e+06	4408.29
	337	461737	641719	1343.81				1.51489e+06	2.10538e+06	4408.81
	338	461738	641720	1343.97				1.51489e+06	2.10538e+06	4409.35
	339	461739	641720	1344.2				1.51489e+06	2.10538e+06	4410.11
	340	461739	641720	1344.45				1.51489e+06	2.10538e+06	4410.93
	341	461740	641721	1344.44				1.5149e+06	2.10539e+06	4410.89
	342	461740	641722	1344.36				1.5149e+06	2.10539e+06	4410.62
	343	461741	641723	1343.97				1.5149e+06	2.10539e+06	4409.35
	344	461741	641724	1343.88				1.5149e+06	2.10539e+06	4409.04
	345	461741	641725	1343.7				1.5149e+06	2.1054e+06	4408.48
	346	461743	641725	1343.93				1.5149e+06	2.1054e+06	4409.23
	347	461743	641725	1343.91				1.51491e+06	2.1054e+06	4409.15
	348	461744	641724	1344.5				1.51491e+06	2.10539e+06	4411.1
	349	461745	641724	1344.2				1.51491e+06	2.10539e+06	4410.1
	350	461747	641724	1344.04				1.51492e+06	2.10539e+06	4409.59
	351	461747	641723	1344.32				1.51492e+06	2.10539e+06	4410.5
	352	461748	641722	1344.14				1.51492e+06	2.10539e+06	4409.92
	353	461749	641721	1344.46				1.51492e+06	2.10538e+06	4410.94
	354	461749	641720	1344.83				1.51492e+06	2.10538e+06	4412.17
	355	461749	641719	1345.05				1.51492e+06	2.10538e+06	4412.9
	356	461748	641718	1345.58				1.51492e+06	2.10537e+06	4414.64
	357	461748	641717	1345.85				1.51492e+06	2.10537e+06	4415.53
	358	461749	641717	1345.59				1.51492e+06	2.10537e+06	4414.68
	359	461749	641717	1345.65				1.51493e+06	2.10537e+06	4414.87
	360	461749	641716	1346.06				1.51492e+06	2.10537e+06	4416.22
	361	461748	641714	1346.39				1.51492e+06	2.10536e+06	4417.29
	362	461748	641713	1346.64				1.51492e+06	2.10536e+06	4418.1
	363	461747	641712	1346.62				1.51492e+06	2.10535e+06	4418.06
	364	461747	641711	1346.52				1.51492e+06	2.10535e+06	4417.72
	365	461747	641710	1346.3				1.51492e+06	2.10535e+06	4417
	366	461748	641709	1346				1.51492e+06	2.10535e+06	4416.02
	367	461747	641709	1345.69				1.51492e+06	2.10534e+06	4415.01
	368	461747	641708	1345.3				1.51492e+06	2.10534e+06	4413.73
	369	461746	641709	1345.54				1.51492e+06	2.10534e+06	4414.49
	370	461746	641708	1345.37				1.51491e+06	2.10534e+06	4413.96
	371	461745	641708	1345.26				1.51491e+06	2.10534e+06	4413.57
	372	461744	641708	1345.12				1.51491e+06	2.10534e+06	4413.12
	373	461743	641707	1345.03				1.51491e+06	2.10534e+06	4412.82
	374	461743	641708	1345.37				1.51491e+06	2.10534e+06	4413.95
	375	461744	641709	1345.84				1.51491e+06	2.10534e+06	4415.48
	376	461744	641711	1346.47				1.51491e+06	2.10535e+06	4417.54
	377	461744	641712	1346.69				1.51491e+06	2.10535e+06	4418.29
	378	461744	641714	1346.8				1.51491e+06	2.10536e+06	4418.65
	379	461745	641715	1346.84				1.51491e+06	2.10536e+06	4418.77
	380	461745	641716	1346.75				1.51491e+06	2.10537e+06	4418.47
	381	461744	641717	1346.51				1.51491e+06	2.10537e+06	4417.69
	382	461744	641718	1346.3				1.51491e+06	2.10537e+06	4416.98
	383	461743	641719	1345.98				1.51491e+06	2.10538e+06	4415.95
	384	461744	641719	1345.79				1.51491e+06	2.10538e+06	4415.31
	385	461744	641720	1345.71				1.51491e+06	2.10538e+06	4415.07
	386	461744	641722	1345.53				1.51491e+06	2.10539e+06	4414.47
	387	461744	641722	1345.43				1.51491e+06	2.10539e+06	4414.16
18	388	461751	641717	1345.14				1.51493e+06	2.10537e+06	4413.2
	389	461751	641718	1344.9				1.51493e+06	2.10537e+06	4412.39
	390	461751	641719	1344.53				1.51493e+06	2.10538e+06	4411.19
	391	461752	641718	1344.42				1.51493e+06	2.10537e+06	4410.83
	392	461752	641718	1344.27				1.51494e+06	2.10537e+06	4410.34
	393	461753	641716	1344.57				1.51494e+06	2.10537e+06	4411.32
	394	461753	641715	1344.36				1.51494e+06	2.10536e+06	4410.62
	395	461753	641714	1344.42				1.51494e+06	2.10536e+06	4410.83
	396	461752	641714	1344.8				1.51494e+06	2.10536e+06	4412.08
	397	461752	641715	1345.2				1.51493e+06	2.10536e+06	4413.39
	398	461752	641716	1345.3				1.51493e+06	2.10537e+06	4413.71
	399	461752	641717	1345.27				1.51493e+06	2.10537e+06	4413.6
19	400	461751	641714	1345.14				1.51493e+06	2.10536e+06	4413.2
	401	461751	641713	1344.9				1.51493e+06	2.10536e+06	4412.39
	402	461751	641712	1344.81				1.51493e+06	2.10535e+06	4412.1
	403	461751	641711	1344.83				1.51493e+06	2.10535e+06	4412.16
	404	461750	641710	1344.91				1.51493e+06	2.10535e+06	4412.42
	405	461750	641710	1345.15				1.51493e+06	2.10535e+06	4413.21
	406	461750	641709	1345.27				1.51493e+06	2.10534e+06	4413.6
	407	461751	641708	1344.81				1.51493e+06	2.10534e+06	4412.11
	408	461751	641707	1344.75				1.51493e+06	2.10534e+06	4411.91
	409	461750	641707	1344.75				1.51493e+06	2.10534e+06	4411.91
	410	461750	641707	1344.87				1.51493e+06	2.10534e+06	4412.3
	411	461749	641707	1345.08				1.51492e+06	2.10534e+06	4412.98
	412	461749	641707	1345.06				1.51492e+06	2.10534e+06	4412.94
	413	461748	641707	1345.08				1.51492e+06	2.10534e+06	4412.99
	414	461748	641706	1344.97				1.51492e+06	2.10534e+06	4412.65
	415	461748	641707	1345.1				1.51492e+06	2.10534e+06	4413.04
	416	461748	641707	1345.31				1.51492e+06	2.10534e+06	4413.74
	417	461748	641708	1345.57				1.51492e+06	2.10534e+06	4414.59
	418	461748	641709	1346.04				1.51492e+06	2.10535e+06	4416.14
	419	461749	641710	1346.3				1.51492e+06	2.10535e+06	4417
	420	461749	641712	1346.55				1.51492e+06	2.10535e+06	4417.82
	421	461749	641713	1346.61				1.51492e+06	2.10536e+06	4418.01
	422	461749	641714	1346.33				1.51493e+06	2.10536e+06	4417.09
	423	461750	641714	1346.09				1.51493e+06	2.10536e+06	4416.31
	424	461750	641715	1345.89				1.51493e+06	2.10536e+06	4415.66
	425	461750	641715	1345.47				1.51493e+06	2.10537e+06	4414.27
	426	461751	641715	1345.34				1.51493e+06	2.10536e+06	4413.83
20	427	461752	641709	1344.66				1.51493e+06	2.10535e+06	4411.61
	428	461752	641709	1344.28				1.51493e+06	2.10534e+06	4410.37
	429	461752	641708	1344.29				1.51493e+06	2.10534e+06	4410.4
	430	461752	641707	1344.36				1.51493e+06	2.10534e+06	4410.62
	431	461752	641706	1344.18				1.51493e+06	2.10534e+06	4410.05
	432	461751	641706	1344.26				1.51493e+06	2.10533e+06	4410.3
	433	461751	641705	1344.13				1.51493e+06	2.10533e+06	4409.88
	434	461751	641704	1343.94				1.51493e+06	2.10533e+06	4409.25
	435	461752	641703	1343.87				1.51493e+06	2.10533e+06	4409.02
	436	461752	641703	1343.83				1.51493e+06	2.10532e+06	4408.88
	437	461752	641702	1343.68				1.51493e+06	2.10532e+06	4408.39
	438	461751	641701	1343.8				1.51493e+06	2.10532e+06	4408.79
	439	461750	641703	1344.32				1.51493e+06	2.10533e+06	4410.49
	440	461749	641703	1344.32				1.51493e+06	2.10533e+06	4410.49
	441	461749	641704	1344.45				1.51492e+06	2.10533e+06	4410.92
	442	461749	641704	1344.62				1.51493e+06	2.10533e+06	4411.49
	443	461749	641705	1344.67				1.51493e+06	2.10533e+06	4411.66
	444	461749	641704	1344.69				1.51492e+06	2.10533e+06	4411.71
	445	461748	641705	1344.62				1.51492e+06	2.10533e+06	4411.48
	446	461748	641705	1344.87				1.51492e+06	2.10533e+06	4412.3
	447	461749	641706	1345				1.51492e+06	2.10533e+06	4412.73
	448	461749	641706	1344.98				1.51493e+06	2.10534e+06	4412.66
	449	461750	641706	1344.86				1.51493e+06	2.10534e+06	4412.27
	450	461751	641707	1344.69				1.51493e+06	2.10534e+06	4411.7
	451	461751	641708	1344.77				1.51493e+06	2.10534e+06	4411.98
	452	461751	641709	1344.8				1.51493e+06	2.10534e+06	4412.08
	453	461751	641709	1344.76				1.51493e+06	2.10535e+06	4411.95
21	454	461753	641707	1343.98				1.51494e+06	2.10534e+06	4409.37
	455	461753	641708	1343.87				1.51494e+06	2.10534e+06	4409.03
	456	461754	641708	1343.76				1.51494e+06	2.10534e+06	4408.66
	457	461754	641708	1343.42				1.51494e+06	2.10534e+06	4407.56
	458	461754	641708	1343.27				1.51494e+06	2.10534e+06	4407.07
	459	461754	641707	1343.38				1.51494e+06	2.10534e+06	4407.42
	460	461754	641706	1343.31				1.51494e+06	2.10533e+06	4407.18
	461	461753	641705	1343.42				1.51494e+06	2.10533e+06	4407.53
	462	461754	641704	1342.87				1.51494e+06	2.10533e+06	4405.74
	463	461754	641703	1342.94				1.51494e+06	2.10532e+06	4405.96
	464	461754	641702	1343.13				1.51494e+06	2.10532e+06	4406.6
	465	461754	641701	1343.06				1.51494e+06	2.10532e+06	4406.35
	466	461754	641699	1342.91				1.51494e+06	2.10531e+06	4405.89
	467	461755	641698	1342.84				1.51494e+06	2.10531e+06	4405.65
	468	461754	641698	1343				1.51494e+06	2.10531e+06	4406.17
	469	461754	641700	1343.3				1.51494e+06	2.10531e+06	4407.14
	470	461753	641701	1343.49				1.51494e+06	2.10532e+06	4407.77
	471	461753	641702	1343.71				1.51494e+06	2.10532e+06	4408.5
	472	461753	641704	1343.85				1.51494e+06	2.10533e+06	4408.94
	473	461752	641705	1344.01				1.51494e+06	2.10533e+06	4409.5
	474	461753	641707	1343.99				1.51494e+06	2.10534e+06	4409.43
22	475	461757	641701	1342.34				1.51495e+06	2.10532e+06	4404
	476	461757	641702	1342.01				1.51495e+06	2.10532e+06	4402.94
	477	461758	641701	1341.73				1.51495e+06	2.10532e+06	4401.99
	478	461758	641701	1341.62				1.51495e+06	2.10532e+06	4401.64
	479	461758	641700	1341.76				1.51495e+06	2.10532e+06	4402.09
	480	461758	641699	1341.84				1.51495e+06	2.10531e+06	4402.37
	481	461758	641699	1341.68				1.51495e+06	2.10531e+06	4401.82
	482	461758	641698	1341.66				1.51496e+06	2.10531e+06	4401.76
	483	461758	641698	1341.8				1.51495e+06	2.10531e+06	4402.23
	484	461758	641697	1341.49				1.51496e+06	2.10531e+06	4401.2
	485	461759	641697	1341.35				1.51496e+06	2.10531e+06	4400.74
	486	461758	641697	1341.5				1.51495e+06	2.1053e+06	4401.25
	487	461758	641696	1341.64				1.51495e+06	2.1053e+06	4401.7
	488	461757	641696	1342.03				1.51495e+06	2.1053e+06	4402.97
	489	461757	641697	1342.27				1.51495e+06	2.10531e+06	4403.77
	490	461757	641698	1342.47				1.51495e+06	2.10531e+06	4404.42
	491	461756	641699	1342.66				1.51495e+06	2.10531e+06	4405.06
	492	461756	641700	1342.62				1.51495e+06	2.10531e+06	4404.94
	493	461757	641700	1342.43				1.51495e+06	2.10532e+06	4404.3
23	494	461761	641697	1340.76				1.51497e+06	2.10531e+06	4398.81
	495	461762	641698	1340.64				1.51497e+06	2.10531e+06	4398.42
	496	461762	641698	1340.45				1.51497e+06	2.10531e+06	4397.8
	497	461762	641699	1340.25				1.51497e+06	2.10531e+06	4397.15
	498	461763	641698	1339.99				1.51497e+06	2.10531e+06	4396.28
	499	461763	641698	1340.02				1.51497e+06	2.10531e+06	4396.39
	500	461762	641697	1340.08				1.51497e+06	2.1053e+06	4396.6
	501	461762	641696	1340.15				1.51497e+06	2.1053e+06	4396.81
	502	461762	641695	1340.31				1.51497e+06	2.1053e+06	4397.35
	503	461761	641696	1340.63				1.51497e+06	2.1053e+06	4398.4
	504	461761	641697	1340.72				1.51497e+06	2.1053e+06	4398.67
24	505	461769	641695	1338.45				1.51499e+06	2.1053e+06	4391.26
	506	461769	641695	1338.33				1.51499e+06	2.1053e+06	4390.83
	507	461770	641695	1338.21				1.51499e+06	2.1053e+06	4390.46
	508	461770	641695	1338.13				1.51499e+06	2.1053e+06	4390.2
	509	461770	641694	1338.09				1.51499e+06	2.1053e+06	4390.05
	510	461770	641694	1338.06				1.51499e+06	2.10529e+06	4389.96
	511	461769	641694	1338.25				1.51499e+06	2.10529e+06	4390.57
	512	461769	641694	1338.37				1.51499e+06	2.1053e+06	4390.99
25	513	461756	641678	1343.49				1.51495e+06	2.10524e+06	4407.77
	514	461756	641677	1343.49				1.51495e+06	2.10524e+06	4407.77
	515	461756	641676	1343.54				1.51495e+06	2.10524e+06	4407.94
	516	461755	641675	1344.19				1.51495e+06	2.10523e+06	4410.06
	517	461755	641674	1344.55				1.51494e+06	2.10523e+06	4411.26
	518	461754	641673	1344.64				1.51494e+06	2.10523e+06	4411.54
	519	461754	641672	1345.05				1.51494e+06	2.10522e+06	4412.88
	520	461753	641671	1345.1				1.51494e+06	2.10522e+06	4413.05
	521	461752	641670	1345.26				1.51494e+06	2.10522e+06	4413.6
	522	461752	641669	1345.45				1.51493e+06	2.10521e+06	4414.19
	523	461751	641667	1345.42				1.51493e+06	2.10521e+06	4414.12
	524	461751	641666	1345.45				1.51493e+06	2.1052e+06	4414.22
	525	461750	641664	1345.58				1.51493e+06	2.1052e+06	4414.62
	526	461749	641663	1345.74				1.51493e+06	2.10519e+06	4415.14
	527	461749	641661	1345.79				1.51492e+06	2.10519e+06	4415.33
	528	461749	641660	1345.74				1.51492e+06	2.10518e+06	4415.17
	529	461748	641658	1346.12				1.51492e+06	2.10518e+06	4416.4
	530	461747	641657	1346.15				1.51492e+06	2.10517e+06	4416.5
	531	461748	641656	1346.16				1.51492e+06	2.10517e+06	4416.53
	532	461748	641655	1345.98				1.51492e+06	2.10517e+06	4415.95
	533	461747	641654	1346.05				1.51492e+06	2.10516e+06	4416.16
	534	461746	641653	1346.21				1.51492e+06	2.10516e+06	4416.7
	535	461745	641651	1346.38				1.51491e+06	2.10516e+06	4417.27
	536	461745	641650	1346.45				1.51491e+06	2.10515e+06	4417.47
	537	461745	641649	1346.55				1.51491e+06	2.10515e+06	4417.83
	538	461745	641648	1346.41				1.51491e+06	2.10514e+06	4417.37
	539	461745	641647	1346.56				1.51491e+06	2.10514e+06	4417.85
	540	461745	641646	1346.42				1.51491e+06	2.10514e+06	4417.39
	541	461745	641644	1346.51				1.51491e+06	2.10513e+06	4417.7
	542	461744	641643	1346.77				1.51491e+06	2.10513e+06	4418.52
	543	461743	641642	1346.8				1.51491e+06	2.10513e+06	4418.64
	544	461743	641641	1347.03				1.5149e+06	2.10512e+06	4419.41
	545	461742	641640	1346.88				1.5149e+06	2.10512e+06	4418.9
	546	461742	641639	1347.1				1.5149e+06	2.10511e+06	4419.63
	547	461741	641639	1347.13				1.5149e+06	2.10511e+06	4419.72
	548	461740	641638	1347.04				1.5149e+06	2.10511e+06	4419.43
	549	461740	641639	1347.03				1.51489e+06	2.10511e+06	4419.4
	550	461740	641640	1347				1.51489e+06	2.10512e+06	4419.29
	551	461741	641642	1346.91				1.5149e+06	2.10512e+06	4419
	552	461741	641642	1347.06				1.5149e+06	2.10513e+06	4419.47
	553	461742	641643	1347.11				1.5149e+06	2.10513e+06	4419.66
	554	461742	641644	1347.08				1.5149e+06	2.10513e+06	4419.57
	555	461742	641645	1346.88				1.5149e+06	2.10513e+06	4418.91
	556	461743	641646	1346.91				1.51491e+06	2.10514e+06	4419.01
	557	461743	641647	1346.71				1.51491e+06	2.10514e+06	4418.35
	558	461743	641648	1346.56				1.5149e+06	2.10514e+06	4417.84
	559	461743	641648	1346.55				1.51491e+06	2.10515e+06	4417.81
	560	461744	641649	1346.51				1.51491e+06	2.10515e+06	4417.7
	561	461744	641650	1346.44				1.51491e+06	2.10515e+06	4417.45
	562	461744	641652	1346.29				1.51491e+06	2.10516e+06	4416.98
	563	461745	641653	1346.31				1.51491e+06	2.10516e+06	4417.03
	564	461746	641654	1346.2				1.51491e+06	2.10516e+06	4416.68
	565	461746	641656	1346.21				1.51492e+06	2.10517e+06	4416.71
	566	461746	641656	1346.05				1.51491e+06	2.10517e+06	4416.18
	567	461746	641657	1346.09				1.51491e+06	2.10517e+06	4416.31
	568	461746	641658	1346.04				1.51492e+06	2.10518e+06	4416.13
	569	461747	641660	1346.06				1.51492e+06	2.10518e+06	4416.22
	570	461747	641661	1345.87				1.51492e+06	2.10519e+06	4415.57
	571	461748	641663	1345.85				1.51492e+06	2.10519e+06	4415.53
	572	461749	641665	1345.86				1.51492e+06	2.1052e+06	4415.56
	573	461749	641666	1345.77				1.51493e+06	2.1052e+06	4415.27
	574	461750	641667	1345.63				1.51493e+06	2.10521e+06	4414.79
	575	461750	641669	1345.52				1.51493e+06	2.10521e+06	4414.44
	576	461751	641671	1345.34				1.51493e+06	2.10522e+06	4413.86
	577	461752	641673	1345.27				1.51493e+06	2.10523e+06	4413.62
	578	461753	641676	1344.98				1.51494e+06	2.10523e+06	4412.66
	579	461754	641677	1344.86				1.51494e+06	2.10524e+06	4412.27
	580	461753	641677	1344.56				1.51494e+06	2.10524e+06	4411.27
	581	461752	641678	1344.3				1.51494e+06	2.10524e+06	4410.44
	582	461752	641679	1344				1.51494e+06	2.10525e+06	4409.45
	583	461753	641680	1343.82				1.51494e+06	2.10525e+06	4408.86
	584	461753	641680	1343.69				1.51494e+06	2.10525e+06	4408.42
	585	461755	641679	1343.71				1.51494e+06	2.10525e+06	4408.49
	586	461756	641679	1343.74				1.51495e+06	2.10525e+06	4408.6
	587	461756	641678	1343.61				1.51495e+06	2.10524e+06	4408.17
26	588	461742	641638	1347.03				1.5149e+06	2.10511e+06	4419.4
	589	461742	641638	1346.78				1.5149e+06	2.10511e+06	4418.57
	590	461742	641637	1346.81				1.5149e+06	2.10511e+06	4418.66
	591	461742	641636	1346.75				1.5149e+06	2.10511e+06	4418.48
	592	461742	641636	1346.77				1.5149e+06	2.1051e+06	4418.53
	593	461741	641635	1346.55				1.5149e+06	2.1051e+06	4417.83
	594	461741	641634	1346.49				1.5149e+06	2.1051e+06	4417.61
	595	461741	641634	1346.48				1.5149e+06	2.1051e+06	4417.58
	596	461740	641635	1346.75				1.5149e+06	2.1051e+06	4418.46
	597	461741	641636	1346.88				1.5149e+06	2.1051e+06	4418.89
	598	461741	641637	1347.04				1.5149e+06	2.10511e+06	4419.42
	599	461742	641638	1347.08				1.5149e+06	2.10511e+06	4419.54
27	600	461738	641636	1346.99				1.51489e+06	2.1051e+06	4419.24
	601	461739	641635	1347.17				1.51489e+06	2.1051e+06	4419.85
	602	461739	641635	1347.11				1.51489e+06	2.1051e+06	4419.66
	603	461739	641634	1346.84				1.51489e+06	2.1051e+06	4418.77
	604	461738	641633	1346.76				1.51489e+06	2.1051e+06	4418.52
	605	461738	641632	1346.55				1.51489e+06	2.10509e+06	4417.82
	606	461737	641631	1346.71				1.51489e+06	2.10509e+06	4418.36
	607	461736	641631	1346.69				1.51488e+06	2.10509e+06	4418.26
	608	461736	641632	1346.77				1.51488e+06	2.10509e+06	4418.53
	609	461737	641633	1347.02				1.51488e+06	2.1051e+06	4419.35
	610	461737	641634	1347.03				1.51489e+06	2.1051e+06	4419.39
	611	461738	641635	1347.28				1.51489e+06	2.1051e+06	4420.2
	612	461738	641636	1346.99				1.51489e+06	2.1051e+06	4419.25
28	613	461738	641631	1346.51				1.51489e+06	2.10509e+06	4417.69
	614	461738	641631	1346.36				1.51489e+06	2.10509e+06	4417.19
	615	461739	641630	1346.16				1.51489e+06	2.10509e+06	4416.52
	616	461738	641629	1346.29				1.51489e+06	2.10508e+06	4416.96
	617	461738	641628	1346.16				1.51489e+06	2.10508e+06	4416.54
	618	461737	641627	1346.13				1.51488e+06	2.10508e+06	4416.44
	619	461736	641628	1346.16				1.51488e+06	2.10508e+06	4416.55
	620	461737	641629	1346.33				1.51489e+06	2.10508e+06	4417.1
	621	461737	641630	1346.52				1.51489e+06	2.10509e+06	4417.72
29	622	461734	641629	1346.18				1.51487e+06	2.10508e+06	4416.62
	623	461735	641628	1346.34				1.51488e+06	2.10508e+06	4417.11
	624	461735	641628	1346.33				1.51488e+06	2.10508e+06	4417.09
	625	461735	641627	1346.35				1.51488e+06	2.10508e+06	4417.16
	626	461734	641626	1346.1				1.51488e+06	2.10507e+06	4416.35
	627	461734	641625	1345.61				1.51488e+06	2.10507e+06	4414.74
	628	461733	641623	1345.75				1.51487e+06	2.10506e+06	4415.21
	629	461732	641622	1345.65				1.51487e+06	2.10506e+06	4414.85
	630	461732	641621	1345.68				1.51487e+06	2.10506e+06	4414.95
	631	461731	641620	1345.7				1.51487e+06	2.10505e+06	4415.03
	632	461730	641619	1345.72				1.51486e+06	2.10505e+06	4415.11
	633	461729	641618	1345.82				1.51486e+06	2.10505e+06	4415.41
	634	461729	641617	1345.57				1.51486e+06	2.10504e+06	4414.59
	635	461728	641615	1345.38				1.51486e+06	2.10504e+06	4413.96
	636	461727	641613	1345.01				1.51485e+06	2.10503e+06	4412.76
	637	461726	641611	1344.71				1.51485e+06	2.10502e+06	4411.77
	638	461725	641609	1344.41				1.51484e+06	2.10502e+06	4410.81
	639	461724	641608	1344.15				1.51484e+06	2.10501e+06	4409.94
	640	461724	641605	1343.72				1.51484e+06	2.105e+06	4408.55
	641	461724	641604	1343.51				1.51484e+06	2.105e+06	4407.86
	642	461724	641604	1343.56				1.51484e+06	2.105e+06	4408
	643	461723	641603	1343.48				1.51484e+06	2.105e+06	4407.76
	644	461723	641602	1343.14				1.51484e+06	2.10499e+06	4406.64
	645	461722	641600	1342.81				1.51483e+06	2.10499e+06	4405.55
	646	461721	641599	1342.57				1.51483e+06	2.10498e+06	4404.77
	647	461720	641597	1342.15				1.51483e+06	2.10498e+06	4403.37
	648	461719	641596	1341.85				1.51483e+06	2.10497e+06	4402.39
	649	461718	641594	1341.67				1.51482e+06	2.10497e+06	4401.81
	650	461717	641592	1341.25				1.51482e+06	2.10496e+06	4400.41
	651	461716	641591	1341.02				1.51482e+06	2.10496e+06	4399.66
	652	461716	641589	1340.73				1.51482e+06	2.10495e+06	4398.71
	653	461715	641588	1340.42				1.51481e+06	2.10495e+06	4397.7
	654	461715	641587	1340.28				1.51481e+06	2.10495e+06	4397.24
	655	461715	641587	1340.12				1.51481e+06	2.10494e+06	4396.71
	656	461714	641586	1340.11				1.51481e+06	2.10494e+06	4396.68
	657	461714	641587	1340.2				1.51481e+06	2.10494e+06	4396.97
	658	461714	641588	1340.5				1.51481e+06	2.10495e+06	4397.98
	659	461715	641590	1340.68				1.51481e+06	2.10495e+06	4398.54
	660	461715	641591	1340.84				1.51481e+06	2.10496e+06	4399.08
	661	461715	641592	1341.05				1.51481e+06	2.10496e+06	4399.77
	662	461716	641593	1341.43				1.51482e+06	2.10497e+06	4401.02
	663	461716	641594	1341.53				1.51482e+06	2.10497e+06	4401.34
	664	461717	641596	1341.75				1.51482e+06	2.10497e+06	4402.06
	665	461719	641598	1342.33				1.51483e+06	2.10498e+06	4403.97
	666	461720	641601	1342.98				1.51483e+06	2.10499e+06	4406.11
	667	461721	641604	1343.26				1.51483e+06	2.105e+06	4407.02
	668	461722	641606	1343.66				1.51484e+06	2.10501e+06	4408.34
	669	461722	641607	1343.74				1.51484e+06	2.10501e+06	4408.6
	670	461723	641610	1344.02				1.51484e+06	2.10502e+06	4409.5
	671	461724	641612	1344.37				1.51484e+06	2.10503e+06	4410.65
	672	461725	641613	1344.7				1.51485e+06	2.10503e+06	4411.75
	673	461727	641615	1345.15				1.51485e+06	2.10504e+06	4413.21
	674	461728	641617	1345.5				1.51485e+06	2.10504e+06	4414.36
	675	461728	641619	1345.87				1.51486e+06	2.10505e+06	4415.59
	676	461729	641620	1345.9				1.51486e+06	2.10505e+06	4415.68
	677	461730	641622	1345.89				1.51486e+06	2.10506e+06	4415.65
	678	461731	641623	1346.16				1.51486e+06	2.10506e+06	4416.53
	679	461732	641625	1346.25				1.51487e+06	2.10507e+06	4416.82
	680	461732	641627	1346.27				1.51487e+06	2.10507e+06	4416.91
	681	461733	641628	1346.26				1.51487e+06	2.10508e+06	4416.85
30	682	461711	641582	1339.89				1.5148e+06	2.10493e+06	4395.97
	683	461712	641582	1339.76				1.5148e+06	2.10493e+06	4395.54
	684	461712	641581	1339.72				1.5148e+06	2.10492e+06	4395.41
	685	461711	641580	1339.7				1.5148e+06	2.10492e+06	4395.35
	686	461710	641579	1339.58				1.5148e+06	2.10492e+06	4394.96
	687	461711	641578	1339.28				1.5148e+06	2.10491e+06	4393.95
	688	461711	641577	1339.1				1.5148e+06	2.10491e+06	4393.36
	689	461710	641577	1339.15				1.5148e+06	2.10491e+06	4393.55
	690	461708	641577	1339.15				1.51479e+06	2.10491e+06	4393.54
	691	461707	641578	1339.2				1.51479e+06	2.10491e+06	4393.69
	692	461706	641578	1339.24				1.51478e+06	2.10492e+06	4393.85
	693	461705	641579	1338.95				1.51478e+06	2.10492e+06	4392.89
	694	461703	641579	1338.79				1.51477e+06	2.10492e+06	4392.37
	695	461701	641579	1338.5				1.51477e+06	2.10492e+06	4391.4
	696	461700	641579	1338.31				1.51476e+06	2.10492e+06	4390.78
	697	461700	641580	1338.28				1.51476e+06	2.10492e+06	4390.68
	698	461702	641579	1338.69				1.51477e+06	2.10492e+06	4392.02
	699	461704	641579	1338.88				1.51478e+06	2.10492e+06	4392.66
	700	461706	641579	1339.23				1.51478e+06	2.10492e+06	4393.79
	701	461707	641579	1339.37				1.51479e+06	2.10492e+06	4394.27
	702	461708	641580	1339.52				1.51479e+06	2.10492e+06	4394.74
	703	461708	641580	1339.63				1.51479e+06	2.10492e+06	4395.12
	704	461709	641581	1339.78				1.51479e+06	2.10493e+06	4395.61
	705	461710	641582	1339.88				1.5148e+06	2.10493e+06	4395.93
31	706	461742	641708	1345.04				1.5149e+06	2.10534e+06	4412.87
	707	461741	641708	1344.9				1.5149e+06	2.10534e+06	4412.39
	708	461740	641708	1344.83				1.51489e+06	2.10534e+06	4412.18
	709	461739	641709	1344.69				1.51489e+06	2.10535e+06	4411.72
	710	461739	641710	1344.56				1.51489e+06	2.10535e+06	4411.28
	711	461739	641711	1344.8				1.51489e+06	2.10535e+06	4412.06
	712	461739	641712	1344.83				1.51489e+06	2.10535e+06	4412.18
	713	461740	641714	1344.87				1.51489e+06	2.10536e+06	4412.3
	714	461740	641714	1345.03				1.51489e+06	2.10536e+06	4412.82
	715	461741	641717	1345.32				1.5149e+06	2.10537e+06	4413.78
	716	461741	641717	1345.68				1.5149e+06	2.10537e+06	4414.97
	717	461742	641717	1346.1				1.5149e+06	2.10537e+06	4416.34
	718	461743	641718	1345.83				1.5149e+06	2.10537e+06	4415.45
	719	461743	641717	1346.45				1.51491e+06	2.10537e+06	4417.48
	720	461743	641715	1346.88				1.51491e+06	2.10537e+06	4418.89
	721	461743	641713	1346.86				1.5149e+06	2.10536e+06	4418.84
	722	461743	641712	1346.71				1.51491e+06	2.10535e+06	4418.35
	723	461743	641710	1346.3				1.5149e+06	2.10535e+06	4416.99
	724	461743	641710	1346.16				1.5149e+06	2.10535e+06	4416.53
	725	461743	641708	1345.44				1.5149e+06	2.10534e+06	4414.19
32	726	461738	641708	1344.51				1.51489e+06	2.10534e+06	4411.14
	727	461739	641706	1344.51				1.51489e+06	2.10533e+06	4411.11
	728	461738	641703	1344.26				1.51489e+06	2.10532e+06	4410.29
	729	461738	641701	1344.11				1.51489e+06	2.10532e+06	4409.82
	730	461738	641699	1344.12				1.51489e+06	2.10531e+06	4409.86
	731	461737	641697	1344.12				1.51489e+06	2.1053e+06	4409.83
	732	461737	641696	1344.19				1.51489e+06	2.1053e+06	4410.06
	733	461737	641694	1344.27				1.51488e+06	2.10529e+06	4410.32
	734	461736	641693	1344.06				1.51488e+06	2.10529e+06	4409.65
	735	461736	641690	1343.99				1.51488e+06	2.10528e+06	4409.41
	736	461735	641688	1343.83				1.51488e+06	2.10528e+06	4408.88
	737	461734	641687	1343.85				1.51488e+06	2.10527e+06	4408.95
	738	461733	641684	1343.71				1.51487e+06	2.10526e+06	4408.48
	739	461731	641680	1343.53				1.51487e+06	2.10525e+06	4407.9
	740	461730	641678	1343.53				1.51486e+06	2.10524e+06	4407.91
	741	461728	641673	1343.62				1.51486e+06	2.10523e+06	4408.19
	742	461727	641669	1343.61				1.51485e+06	2.10521e+06	4408.18
	743	461726	641667	1343.35				1.51485e+06	2.10521e+06	4407.3
	744	461725	641665	1343.15				1.51485e+06	2.1052e+06	4406.64
	745	461725	641666	1343.03				1.51485e+06	2.1052e+06	4406.26
	746	461725	641667	1343.06				1.51484e+06	2.10521e+06	4406.37
	747	461726	641669	1343.16				1.51485e+06	2.10521e+06	4406.68
	748	461727	641671	1343.34				1.51485e+06	2.10522e+06	4407.29
	749	461727	641673	1343.3				1.51485e+06	2.10523e+06	4407.16
	750	461727	641675	1343.07				1.51485e+06	2.10523e+06	4406.39
	751	461729	641677	1343.3				1.51486e+06	2.10524e+06	4407.15
	752	461731	641680	1343.34				1.51486e+06	2.10525e+06	4407.29
	753	461732	641683	1343.45				1.51487e+06	2.10526e+06	4407.66
	754	461733	641688	1343.3				1.51487e+06	2.10528e+06	4407.14
	755	461734	641690	1343.35				1.51487e+06	2.10528e+06	4407.33
	756	461734	641692	1343.25				1.51487e+06	2.10529e+06	4406.99
	757	461735	641694	1343.43				1.51488e+06	2.1053e+06	4407.58
	758	461735	641695	1343.55				1.51488e+06	2.1053e+06	4407.96
	759	461736	641697	1343.84				1.51488e+06	2.1053e+06	4408.91
	760	461736	641697	1343.53				1.51488e+06	2.10531e+06	4407.89
	761	461736	641698	1343.42				1.51488e+06	2.10531e+06	4407.56
	762	461737	641700	1343.64				1.51488e+06	2.10532e+06	4408.25
	763	461738	641704	1343.71				1.51489e+06	2.10533e+06	4408.48
	764	461738	641706	1344.23				1.51489e+06	2.10534e+06	4410.2
	765	461738	641707	1344.25				1.51489e+06	2.10534e+06	4410.27
	766	461738	641708	1344.39				1.51489e+06	2.10534e+06	4410.73
33	767	461723	641665	1342.96				1.51484e+06	2.1052e+06	4406.03
	768	461723	641662	1343.27				1.51484e+06	2.10519e+06	4407.05
	769	461723	641660	1343.39				1.51484e+06	2.10518e+06	4407.43
	770	461723	641658	1343.46				1.51484e+06	2.10518e+06	4407.69
	771	461722	641655	1343.3				1.51484e+06	2.10517e+06	4407.14
	772	461721	641654	1343.05				1.51483e+06	2.10516e+06	4406.35
	773	461721	641654	1343.06				1.51483e+06	2.10517e+06	4406.38
	774	461721	641655	1342.95				1.51483e+06	2.10517e+06	4406.02
	775	461721	641657	1343.2				1.51483e+06	2.10517e+06	4406.83
	776	461722	641658	1343.05				1.51484e+06	2.10518e+06	4406.32
	777	461722	641659	1343.09				1.51484e+06	2.10518e+06	4406.48
	778	461723	641661	1343.21				1.51484e+06	2.10519e+06	4406.86
	779	461723	641662	1343.04				1.51484e+06	2.10519e+06	4406.3
	780	461723	641663	1342.97				1.51484e+06	2.10519e+06	4406.06
	781	461723	641665	1342.8				1.51484e+06	2.1052e+06	4405.51
34	782	461718	641646	1342.44				1.51482e+06	2.10514e+06	4404.32
	783	461718	641644	1342.41				1.51482e+06	2.10513e+06	4404.23
	784	461718	641643	1342.32				1.51482e+06	2.10513e+06	4403.95
	785	461717	641644	1342.17				1.51482e+06	2.10513e+06	4403.45
	786	461717	641645	1342.2				1.51482e+06	2.10514e+06	4403.55
	787	461718	641646	1342.34				1.51482e+06	2.10514e+06	4404.01

## Sheet: Sheet3
Injectite #3
Segment #	GPS Point #	Northings (m)	Eastings (m)	Elevation (m)				Northings (ft)	Eastings (ft)	Elevation (ft)
1	2	464409	640305	1260.91				1.52365e+06	2.10074e+06	4136.83
	3	464407	640304	1260.82				1.52365e+06	2.10074e+06	4136.53
	4	464406	640304	1260.4				1.52364e+06	2.10073e+06	4135.16
	5	464405	640303	1259.81				1.52364e+06	2.10073e+06	4133.23
	6	464405	640303	1259.51				1.52364e+06	2.10073e+06	4132.26
	7	464404	640302	1259.13				1.52364e+06	2.10073e+06	4130.99
	8	464404	640303	1258.69				1.52364e+06	2.10073e+06	4129.56
	9	464404	640304	1258.81				1.52364e+06	2.10074e+06	4129.95
	10	464404	640305	1258.61				1.52364e+06	2.10074e+06	4129.31
	11	464405	640306	1258.99				1.52364e+06	2.10074e+06	4130.54
	12	464406	640306	1259.35				1.52364e+06	2.10074e+06	4131.72
	13	464407	640307	1259.68				1.52365e+06	2.10074e+06	4132.82
	14	464409	640306	1260.77				1.52365e+06	2.10074e+06	4136.4
2	15	464403	640300	1258.73				1.52363e+06	2.10072e+06	4129.69
	16	464403	640300	1258.48				1.52363e+06	2.10072e+06	4128.86
	17	464403	640299	1257.98				1.52363e+06	2.10072e+06	4127.24
	18	464402	640298	1257.7				1.52363e+06	2.10072e+06	4126.32
	19	464402	640298	1257.22				1.52363e+06	2.10071e+06	4124.72
	20	464401	640297	1257.08				1.52363e+06	2.10071e+06	4124.27
	21	464400	640297	1256.46				1.52362e+06	2.10071e+06	4122.25
	22	464400	640296	1256.12				1.52362e+06	2.10071e+06	4121.13
	23	464399	640295	1255.63				1.52362e+06	2.10071e+06	4119.53
	24	464398	640295	1255.32				1.52362e+06	2.10071e+06	4118.51
	25	464397	640295	1255.33				1.52361e+06	2.10071e+06	4118.52
	26	464396	640295	1254.37				1.52361e+06	2.1007e+06	4115.4
	27	464395	640294	1254.04				1.52361e+06	2.1007e+06	4114.31
	28	464394	640294	1253.64				1.5236e+06	2.1007e+06	4112.99
	29	464394	640294	1253.4				1.5236e+06	2.1007e+06	4112.21
	30	464393	640294	1253.29				1.5236e+06	2.1007e+06	4111.86
	31	464393	640293	1252.62				1.5236e+06	2.1007e+06	4109.63
	32	464392	640293	1252.61				1.5236e+06	2.1007e+06	4109.6
	33	464392	640292	1252.03				1.52359e+06	2.1007e+06	4107.69
	34	464391	640292	1251.75				1.52359e+06	2.10069e+06	4106.79
	35	464391	640291	1251.25				1.52359e+06	2.10069e+06	4105.16
	36	464391	640290	1250.7				1.52359e+06	2.10069e+06	4103.35
	37	464391	640290	1250.49				1.52359e+06	2.10069e+06	4102.67
	38	464390	640290	1249.91				1.52359e+06	2.10069e+06	4100.75
	39	464389	640289	1249.6				1.52359e+06	2.10069e+06	4099.74
	40	464389	640289	1249.44				1.52359e+06	2.10069e+06	4099.22
	41	464388	640289	1249.05				1.52358e+06	2.10069e+06	4097.94
	42	464387	640289	1248.75				1.52358e+06	2.10069e+06	4096.94
	43	464387	640290	1248.55				1.52358e+06	2.10069e+06	4096.31
	44	464387	640291	1248.68				1.52358e+06	2.10069e+06	4096.73
	45	464387	640291	1249.25				1.52358e+06	2.10069e+06	4098.58
	46	464388	640291	1249.93				1.52358e+06	2.10069e+06	4100.81
	47	464389	640292	1250.46				1.52359e+06	2.10069e+06	4102.56
	48	464389	640293	1250.46				1.52359e+06	2.1007e+06	4102.57
	49	464390	640294	1250.76				1.52359e+06	2.1007e+06	4103.54
	50	464390	640295	1251.23				1.52359e+06	2.1007e+06	4105.07
	51	464391	640295	1251.52				1.52359e+06	2.10071e+06	4106.03
	52	464392	640295	1252.38				1.5236e+06	2.10071e+06	4108.85
	53	464393	640296	1252.83				1.5236e+06	2.10071e+06	4110.33
	54	464393	640296	1253.29				1.5236e+06	2.10071e+06	4111.83
	55	464394	640297	1253.9				1.5236e+06	2.10071e+06	4113.85
	56	464395	640297	1254.12				1.52361e+06	2.10071e+06	4114.57
	57	464397	640298	1255.49				1.52361e+06	2.10071e+06	4119.06
	58	464399	640298	1256.36				1.52362e+06	2.10072e+06	4121.92
	59	464399	640299	1256.53				1.52362e+06	2.10072e+06	4122.48
	60	464401	640299	1257.4				1.52362e+06	2.10072e+06	4125.32
	61	464401	640300	1257.59				1.52363e+06	2.10072e+06	4125.94
	62	464402	640300	1257.74				1.52363e+06	2.10072e+06	4126.46
	63	464402	640301	1257.89				1.52363e+06	2.10073e+06	4126.94
	64	464402	640301	1258.11				1.52363e+06	2.10073e+06	4127.67
	65	464403	640301	1258.39				1.52363e+06	2.10073e+06	4128.59
	66	464403	640301	1258.63				1.52363e+06	2.10072e+06	4129.35
	67	464403	640300	1258.71				1.52363e+06	2.10072e+06	4129.63
3	68	464388	640288	1248.83				1.52358e+06	2.10068e+06	4097.2
	69	464388	640287	1248.57				1.52358e+06	2.10068e+06	4096.37
	70	464389	640287	1248.1				1.52358e+06	2.10068e+06	4094.81
	71	464388	640287	1247.73				1.52358e+06	2.10068e+06	4093.62
	72	464388	640286	1247.37				1.52358e+06	2.10068e+06	4092.41
	73	464387	640286	1247.06				1.52358e+06	2.10068e+06	4091.4
	74	464387	640285	1246.65				1.52358e+06	2.10067e+06	4090.05
	75	464386	640285	1246.43				1.52358e+06	2.10067e+06	4089.35
	76	464385	640285	1246.21				1.52357e+06	2.10067e+06	4088.61
	77	464385	640285	1245.95				1.52357e+06	2.10067e+06	4087.75
	78	464384	640285	1245.91				1.52357e+06	2.10067e+06	4087.63
	79	464383	640285	1245.57				1.52357e+06	2.10067e+06	4086.52
	80	464382	640285	1245.32				1.52356e+06	2.10067e+06	4085.7
	81	464382	640284	1245				1.52356e+06	2.10067e+06	4084.65
	82	464381	640284	1244.7				1.52356e+06	2.10067e+06	4083.66
	83	464381	640284	1244.18				1.52356e+06	2.10067e+06	4081.95
	84	464380	640284	1243.93				1.52356e+06	2.10067e+06	4081.14
	85	464379	640283	1243.53				1.52355e+06	2.10067e+06	4079.83
	86	464379	640283	1243.21				1.52355e+06	2.10067e+06	4078.78
	87	464378	640283	1242.97				1.52355e+06	2.10067e+06	4077.97
	88	464377	640282	1242.6				1.52355e+06	2.10066e+06	4076.79
	89	464377	640282	1242.43				1.52355e+06	2.10066e+06	4076.22
	90	464376	640282	1242.21				1.52354e+06	2.10066e+06	4075.49
	91	464375	640282	1241.95				1.52354e+06	2.10066e+06	4074.64
	92	464375	640282	1241.6				1.52354e+06	2.10066e+06	4073.49
	93	464374	640281	1241.22				1.52354e+06	2.10066e+06	4072.23
	94	464374	640280	1240.63				1.52354e+06	2.10066e+06	4070.32
	95	464373	640280	1240.47				1.52353e+06	2.10066e+06	4069.78
	96	464373	640280	1240.32				1.52353e+06	2.10066e+06	4069.28
	97	464371	640280	1239.89				1.52353e+06	2.10066e+06	4067.89
	98	464371	640279	1239.39				1.52353e+06	2.10065e+06	4066.24
	99	464370	640279	1239.11				1.52352e+06	2.10065e+06	4065.33
	100	464369	640279	1238.89				1.52352e+06	2.10065e+06	4064.59
	101	464369	640279	1238.77				1.52352e+06	2.10065e+06	4064.21
	102	464369	640279	1239.03				1.52352e+06	2.10065e+06	4065.07
	103	464368	640280	1238.99				1.52352e+06	2.10066e+06	4064.92
	104	464369	640281	1239.46				1.52352e+06	2.10066e+06	4066.48
	105	464370	640281	1239.83				1.52352e+06	2.10066e+06	4067.67
	106	464371	640281	1240.31				1.52353e+06	2.10066e+06	4069.24
	107	464373	640282	1241.04				1.52353e+06	2.10066e+06	4071.64
	108	464374	640282	1241.4				1.52354e+06	2.10066e+06	4072.82
	109	464375	640283	1241.97				1.52354e+06	2.10067e+06	4074.7
	110	464376	640284	1242.71				1.52354e+06	2.10067e+06	4077.15
	111	464378	640284	1243.56				1.52355e+06	2.10067e+06	4079.91
	112	464379	640285	1243.94				1.52355e+06	2.10067e+06	4081.17
	113	464380	640285	1244.6				1.52356e+06	2.10067e+06	4083.33
	114	464381	640285	1245.09				1.52356e+06	2.10067e+06	4084.94
	115	464381	640286	1245.49				1.52356e+06	2.10068e+06	4086.26
	116	464382	640286	1245.84				1.52356e+06	2.10068e+06	4087.4
	117	464383	640286	1246.17				1.52357e+06	2.10068e+06	4088.5
	118	464384	640286	1246.79				1.52357e+06	2.10068e+06	4090.52
	119	464385	640287	1247.14				1.52357e+06	2.10068e+06	4091.65
	120	464386	640287	1247.97				1.52358e+06	2.10068e+06	4094.4
	121	464387	640288	1248.26				1.52358e+06	2.10068e+06	4095.33
	122	464388	640288	1248.81				1.52358e+06	2.10068e+06	4097.15
4	123	464367	640279	1238.29				1.52351e+06	2.10065e+06	4062.64
	124	464367	640279	1238.09				1.52351e+06	2.10065e+06	4061.96
	125	464366	640278	1237.75				1.52351e+06	2.10065e+06	4060.86
	126	464366	640278	1237.44				1.52351e+06	2.10065e+06	4059.84
	127	464365	640278	1237.11				1.52351e+06	2.10065e+06	4058.78
	128	464364	640277	1236.9				1.52351e+06	2.10065e+06	4058.09
	129	464364	640277	1236.37				1.5235e+06	2.10065e+06	4056.33
	130	464363	640277	1236.16				1.5235e+06	2.10065e+06	4055.66
	131	464362	640276	1235.88				1.5235e+06	2.10064e+06	4054.72
	132	464362	640276	1235.6				1.5235e+06	2.10064e+06	4053.8
	133	464361	640276	1235.35				1.52349e+06	2.10064e+06	4052.99
	134	464361	640276	1235.05				1.52349e+06	2.10064e+06	4052
	135	464360	640275	1234.83				1.52349e+06	2.10064e+06	4051.29
	136	464359	640275	1234.63				1.52349e+06	2.10064e+06	4050.62
	137	464359	640275	1234.39				1.52349e+06	2.10064e+06	4049.83
	138	464358	640275	1234.31				1.52348e+06	2.10064e+06	4049.59
	139	464358	640275	1234.19				1.52348e+06	2.10064e+06	4049.2
	140	464358	640276	1234.23				1.52348e+06	2.10064e+06	4049.32
	141	464358	640276	1234.44				1.52349e+06	2.10064e+06	4050.01
	142	464360	640277	1234.99				1.52349e+06	2.10065e+06	4051.79
	143	464361	640277	1235.58				1.52349e+06	2.10065e+06	4053.72
	144	464362	640277	1235.79				1.5235e+06	2.10065e+06	4054.44
	145	464362	640278	1236.02				1.5235e+06	2.10065e+06	4055.2
	146	464363	640278	1236.62				1.5235e+06	2.10065e+06	4057.15
	147	464364	640278	1237.11				1.5235e+06	2.10065e+06	4058.75
	148	464365	640279	1237.33				1.52351e+06	2.10065e+06	4059.48
	149	464365	640279	1237.51				1.52351e+06	2.10065e+06	4060.06
	150	464366	640279	1237.81				1.52351e+06	2.10065e+06	4061.06
	151	464366	640280	1238.11				1.52351e+06	2.10066e+06	4062.04
	152	464367	640280	1238.37				1.52351e+06	2.10066e+06	4062.89
	153	464367	640280	1238.63				1.52351e+06	2.10066e+06	4063.76
	154	464367	640279	1238.7				1.52352e+06	2.10065e+06	4063.98
5	155	464355	640271	1233.28				1.52348e+06	2.10063e+06	4046.21
	156	464355	640270	1233.25				1.52348e+06	2.10063e+06	4046.09
	157	464355	640270	1233.14				1.52347e+06	2.10062e+06	4045.74
	158	464355	640270	1233.02				1.52347e+06	2.10062e+06	4045.34
	159	464354	640269	1232.84				1.52347e+06	2.10062e+06	4044.74
	160	464354	640269	1232.78				1.52347e+06	2.10062e+06	4044.55
	161	464353	640269	1232.64				1.52347e+06	2.10062e+06	4044.1
	162	464353	640268	1232.49				1.52347e+06	2.10062e+06	4043.6
	163	464353	640269	1232.56				1.52347e+06	2.10062e+06	4043.84
	164	464353	640269	1232.71				1.52347e+06	2.10062e+06	4044.32
	165	464353	640269	1232.7				1.52347e+06	2.10062e+06	4044.28
	166	464354	640270	1232.88				1.52347e+06	2.10062e+06	4044.87
	167	464354	640270	1233.01				1.52347e+06	2.10062e+06	4045.31
	168	464354	640270	1233.03				1.52347e+06	2.10062e+06	4045.36
	169	464355	640270	1233.18				1.52347e+06	2.10062e+06	4045.85
	170	464355	640271	1233.15				1.52347e+06	2.10063e+06	4045.78

## Sheet: Sheet4
Injectite #4
Segment #	GPS Point #	Northings (m)	Eastings (m)	Elevation (m)				Northings (ft)	Eastings (ft)	Elevation (ft)
1	2	464551	639919	1276.45				1.52412e+06	2.09947e+06	4187.84
	3	464552	639919	1276.46				1.52412e+06	2.09947e+06	4187.86
	4	464551	639918	1275.93				1.52412e+06	2.09947e+06	4186.11
	5	464551	639919	1275.64				1.52412e+06	2.09947e+06	4185.18
	6	464551	639919	1275.41				1.52412e+06	2.09947e+06	4184.42
	7	464550	639919	1274.97				1.52411e+06	2.09947e+06	4182.97
	8	464550	639920	1274.76				1.52411e+06	2.09947e+06	4182.29
	9	464550	639920	1274.74				1.52411e+06	2.09948e+06	4182.23
	10	464549	639921	1274.64				1.52411e+06	2.09948e+06	4181.89
	11	464549	639921	1274.61				1.52411e+06	2.09948e+06	4181.78
	12	464550	639922	1274.6				1.52411e+06	2.09948e+06	4181.75
	13	464550	639923	1274.54				1.52411e+06	2.09948e+06	4181.57
	14	464550	639923	1274.81				1.52411e+06	2.09948e+06	4182.45
	15	464551	639922	1275.02				1.52412e+06	2.09948e+06	4183.15
	16	464551	639922	1275.1				1.52412e+06	2.09948e+06	4183.41
	17	464551	639922	1275.64				1.52412e+06	2.09948e+06	4185.17
	18	464551	639921	1276.11				1.52412e+06	2.09948e+06	4186.72
	19	464551	639921	1276.39				1.52412e+06	2.09948e+06	4187.64
2	20	464547	639935	1272.52				1.52411e+06	2.09952e+06	4174.94
	21	464547	639935	1272.32				1.5241e+06	2.09953e+06	4174.27
	22	464546	639936	1271.96				1.5241e+06	2.09953e+06	4173.09
	23	464546	639937	1271.53				1.5241e+06	2.09953e+06	4171.7
	24	464545	639937	1271.38				1.5241e+06	2.09953e+06	4171.19
	25	464545	639938	1271.14				1.5241e+06	2.09953e+06	4170.41
	26	464545	639939	1271.12				1.5241e+06	2.09954e+06	4170.35
	27	464544	639939	1271.17				1.5241e+06	2.09954e+06	4170.49
	28	464544	639940	1271.06				1.52409e+06	2.09954e+06	4170.13
	29	464543	639941	1270.81				1.52409e+06	2.09954e+06	4169.32
	30	464543	639942	1270.66				1.52409e+06	2.09955e+06	4168.84
	31	464543	639942	1270.78				1.52409e+06	2.09955e+06	4169.22
	32	464543	639944	1270.51				1.52409e+06	2.09955e+06	4168.35
	33	464543	639944	1270.56				1.52409e+06	2.09956e+06	4168.49
	34	464543	639944	1271.26				1.52409e+06	2.09955e+06	4170.79
	35	464544	639944	1271.6				1.52409e+06	2.09955e+06	4171.93
	36	464544	639943	1272.16				1.5241e+06	2.09955e+06	4173.75
	37	464545	639942	1272.85				1.5241e+06	2.09955e+06	4176.02
	38	464546	639941	1273.12				1.5241e+06	2.09954e+06	4176.89
	39	464546	639940	1273.2				1.5241e+06	2.09954e+06	4177.16
	40	464546	639938	1273.04				1.5241e+06	2.09953e+06	4176.65
	41	464548	639936	1273.21				1.52411e+06	2.09953e+06	4177.2
	42	464548	639935	1273.29				1.52411e+06	2.09952e+06	4177.46
3	43	464541	639946	1269.64				1.52409e+06	2.09956e+06	4165.5
	44	464541	639946	1269.38				1.52408e+06	2.09956e+06	4164.62
	45	464540	639946	1268.95				1.52408e+06	2.09956e+06	4163.22
	46	464540	639947	1268.62				1.52408e+06	2.09956e+06	4162.15
	47	464540	639947	1268.28				1.52408e+06	2.09956e+06	4161.03
	48	464539	639948	1268.07				1.52408e+06	2.09957e+06	4160.33
	49	464539	639948	1267.86				1.52408e+06	2.09957e+06	4159.65
	50	464538	639949	1267.78				1.52408e+06	2.09957e+06	4159.39
	51	464538	639950	1267.65				1.52407e+06	2.09957e+06	4158.94
	52	464537	639951	1267.38				1.52407e+06	2.09958e+06	4158.09
	53	464536	639952	1267.21				1.52407e+06	2.09958e+06	4157.51
	54	464535	639953	1267.02				1.52407e+06	2.09958e+06	4156.89
	55	464535	639953	1266.83				1.52407e+06	2.09958e+06	4156.26
	56	464534	639954	1266.59				1.52406e+06	2.09959e+06	4155.47
	57	464534	639956	1266.49				1.52406e+06	2.09959e+06	4155.16
	58	464534	639956	1265.97				1.52406e+06	2.09959e+06	4153.46
	59	464533	639957	1265.46				1.52406e+06	2.0996e+06	4151.78
	60	464532	639958	1265				1.52406e+06	2.0996e+06	4150.26
	61	464531	639959	1264.35				1.52405e+06	2.0996e+06	4148.13
	62	464530	639960	1264.21				1.52405e+06	2.09961e+06	4147.66
	63	464529	639960	1263.88				1.52405e+06	2.09961e+06	4146.58
	64	464529	639962	1264.17				1.52404e+06	2.09961e+06	4147.55
	65	464528	639963	1264.21				1.52404e+06	2.09962e+06	4147.69
	66	464528	639963	1263.86				1.52404e+06	2.09962e+06	4146.51
	67	464527	639964	1263.35				1.52404e+06	2.09962e+06	4144.84
	68	464526	639965	1263.05				1.52404e+06	2.09962e+06	4143.88
	69	464526	639966	1262.66				1.52403e+06	2.09962e+06	4142.59
	70	464525	639966	1262.34				1.52403e+06	2.09963e+06	4141.55
	71	464524	639968	1262.01				1.52403e+06	2.09963e+06	4140.47
	72	464524	639968	1261.83				1.52403e+06	2.09963e+06	4139.87
	73	464523	639969	1261.16				1.52403e+06	2.09964e+06	4137.65
	74	464522	639972	1260.92				1.52402e+06	2.09964e+06	4136.87
	75	464521	639973	1260.58				1.52402e+06	2.09965e+06	4135.77
	76	464521	639973	1261.14				1.52402e+06	2.09965e+06	4137.6
	77	464523	639973	1262				1.52402e+06	2.09965e+06	4140.41
	78	464523	639973	1262.42				1.52403e+06	2.09965e+06	4141.81
	79	464524	639973	1263.22				1.52403e+06	2.09965e+06	4144.41
	80	464525	639974	1263.39				1.52403e+06	2.09965e+06	4144.98
	81	464526	639973	1265.46				1.52404e+06	2.09965e+06	4151.77
	82	464527	639972	1265.8				1.52404e+06	2.09965e+06	4152.9
	83	464527	639972	1266.23				1.52404e+06	2.09965e+06	4154.29
	84	464528	639970	1266.73				1.52404e+06	2.09964e+06	4155.94
	85	464529	639969	1266.82				1.52404e+06	2.09964e+06	4156.23
	86	464529	639968	1267				1.52405e+06	2.09963e+06	4156.82
	87	464530	639967	1267.57				1.52405e+06	2.09963e+06	4158.69
	88	464531	639966	1267.66				1.52405e+06	2.09963e+06	4158.98
	89	464531	639964	1267.15				1.52405e+06	2.09962e+06	4157.32
	90	464532	639964	1267.56				1.52406e+06	2.09962e+06	4158.66
	91	464533	639963	1268				1.52406e+06	2.09962e+06	4160.12
	92	464534	639962	1268.44				1.52406e+06	2.09961e+06	4161.55
	93	464534	639961	1268.82				1.52406e+06	2.09961e+06	4162.81
	94	464535	639960	1269.27				1.52407e+06	2.09961e+06	4164.27
	95	464536	639959	1270.03				1.52407e+06	2.0996e+06	4166.77
	96	464537	639958	1270.22				1.52407e+06	2.0996e+06	4167.39
	97	464537	639957	1270.29				1.52407e+06	2.0996e+06	4167.62
	98	464538	639955	1270.66				1.52408e+06	2.09959e+06	4168.82
	99	464539	639953	1270.75				1.52408e+06	2.09958e+06	4169.12
	100	464539	639951	1270.91				1.52408e+06	2.09958e+06	4169.64
	101	464539	639949	1270.82				1.52408e+06	2.09957e+06	4169.34
	102	464540	639949	1270.76				1.52408e+06	2.09957e+06	4169.16
	103	464541	639947	1270.33				1.52409e+06	2.09956e+06	4167.74
	104	464542	639946	1270.13				1.52409e+06	2.09956e+06	4167.1
4	105	464520	639979	1261.03				1.52402e+06	2.09967e+06	4137.22
	106	464521	639978	1260.92				1.52402e+06	2.09966e+06	4136.87
	107	464521	639977	1260.92				1.52402e+06	2.09966e+06	4136.89
	108	464521	639976	1260.96				1.52402e+06	2.09966e+06	4137
	109	464521	639977	1260.64				1.52402e+06	2.09966e+06	4135.94
	110	464520	639977	1260.25				1.52402e+06	2.09966e+06	4134.69
	111	464520	639978	1260.19				1.52402e+06	2.09966e+06	4134.49
	112	464519	639978	1260.05				1.52401e+06	2.09966e+06	4134.02
	113	464519	639979	1259.35				1.52401e+06	2.09967e+06	4131.73
	114	464518	639979	1258.89				1.52401e+06	2.09967e+06	4130.21
	115	464518	639980	1258.95				1.52401e+06	2.09967e+06	4130.4
	116	464517	639981	1258.8				1.52401e+06	2.09967e+06	4129.91
	117	464517	639982	1258.78				1.52401e+06	2.09968e+06	4129.85
	118	464517	639983	1258.99				1.52401e+06	2.09968e+06	4130.54
	119	464517	639983	1258.9				1.52401e+06	2.09968e+06	4130.24
	120	464517	639984	1258.77				1.52401e+06	2.09969e+06	4129.84
	121	464517	639984	1258.86				1.52401e+06	2.09969e+06	4130.13
	122	464518	639984	1259.26				1.52401e+06	2.09968e+06	4131.44
	123	464518	639983	1259.52				1.52401e+06	2.09968e+06	4132.27
	124	464518	639983	1259.58				1.52401e+06	2.09968e+06	4132.48
	125	464519	639982	1260.37				1.52401e+06	2.09968e+06	4135.06
	126	464520	639981	1260.84				1.52401e+06	2.09968e+06	4136.61
	127	464520	639980	1261.12				1.52401e+06	2.09967e+06	4137.52
	128	464520	639979	1261.03				1.52402e+06	2.09967e+06	4137.24
5	129	464515	639986	1257.21				1.524e+06	2.09969e+06	4124.7
	130	464514	639987	1256.79				1.524e+06	2.09969e+06	4123.32
	131	464513	639987	1256.37				1.52399e+06	2.0997e+06	4121.96
	132	464513	639988	1256.29				1.52399e+06	2.0997e+06	4121.7
	133	464512	639989	1256.15				1.52399e+06	2.0997e+06	4121.23
	134	464512	639989	1255.86				1.52399e+06	2.0997e+06	4120.27
	135	464512	639990	1255.68				1.52399e+06	2.0997e+06	4119.67
	136	464511	639990	1255.75				1.52399e+06	2.09971e+06	4119.9
	137	464511	639991	1255.87				1.52399e+06	2.09971e+06	4120.32
	138	464511	639991	1255.46				1.52398e+06	2.09971e+06	4118.98
	139	464510	639992	1255.26				1.52398e+06	2099711	4118.31
	140	464510	639993	1255.17				1.52398e+06	2.09971e+06	4118.02
	141	464509	639993	1255.03				1.52398e+06	2.09972e+06	4117.57
	142	464509	639994	1255.01				1.52398e+06	2.09972e+06	4117.48
	143	464509	639995	1255.23				1.52398e+06	2.09972e+06	4118.19
	144	464509	639995	1255.39				1.52398e+06	2.09972e+06	4118.75
	145	464511	639993	1255.9				1.52399e+06	2.09971e+06	4120.41
	146	464511	639992	1256.13				1.52399e+06	2.09971e+06	4121.16
	147	464512	639991	1256.54				1.52399e+06	2.09971e+06	4122.5
	148	464513	639990	1256.81				1.52399e+06	2.09971e+06	4123.38
	149	464514	639989	1257.06				1.524e+06	2.0997e+06	4124.23
	150	464515	639989	1257.5				1.524e+06	2.0997e+06	4125.66
	151	464515	639988	1257.74				1.524e+06	2.0997e+06	4126.44
	152	464515	639986	1257.59				1.524e+06	2.09969e+06	4125.96
6	153	464521	639994	1261.53				1.52402e+06	2.09972e+06	4138.89
	154	464522	639995	1262.33				1.52402e+06	2.09972e+06	4141.5
	155	464523	639995	1262.83				1.52403e+06	2.09972e+06	4143.15
	156	464524	639995	1263.2				1.52403e+06	2.09972e+06	4144.35
	157	464524	639995	1263.65				1.52403e+06	2.09972e+06	4145.85
	158	464525	639995	1264.21				1.52403e+06	2.09972e+06	4147.66
	159	464526	639995	1264.63				1.52404e+06	2.09972e+06	4149.05
	160	464527	639995	1265.33				1.52404e+06	2.09972e+06	4151.34
	161	464527	639995	1264.95				1.52404e+06	2.09972e+06	4150.1
	162	464526	639995	1264.69				1.52404e+06	2.09972e+06	4149.26
	163	464525	639995	1264.21				1.52403e+06	2.09972e+06	4147.68
	164	464525	639995	1263.83				1.52403e+06	2.09972e+06	4146.43
	165	464524	639995	1263.46				1.52403e+06	2.09972e+06	4145.23
	166	464523	639994	1263.05				1.52403e+06	2.09972e+06	4143.87
	167	464523	639994	1262.66				1.52402e+06	2.09972e+06	4142.59
	168	464522	639994	1262.24				1.52402e+06	2.09972e+06	4141.22
	169	464521	639994	1261.56				1.52402e+06	2.09972e+06	4138.98
7	170	464513	639982	1255.82				1.52399e+06	2.09968e+06	4120.15
	171	464513	639983	1255.8				1.52399e+06	2.09968e+06	4120.07
	172	464513	639983	1255.75				1.52399e+06	2.09968e+06	4119.91
	173	464513	639984	1255.97				1.52399e+06	2.09969e+06	4120.64
	174	464513	639984	1256.17				1.52399e+06	2.09968e+06	4121.29
	175	464513	639983	1256.15				1.52399e+06	2.09968e+06	4121.24
	176	464514	639982	1256.39				1.52399e+06	2.09968e+06	4122.01
	177	464513	639982	1256.28				1.52399e+06	2.09968e+06	4121.65
	178	464513	639982	1256.04				1.52399e+06	2.09968e+06	4120.88
8	179	464511	639984	1254.41				1.52398e+06	2.09969e+06	4115.51
	180	464510	639985	1254.18				1.52398e+06	2.09969e+06	4114.75
	181	464510	639985	1254.09				1.52398e+06	2.09969e+06	4114.46
	182	464509	639985	1253.8				1.52398e+06	2.09969e+06	4113.51
	183	464509	639986	1253.66				1.52398e+06	2.09969e+06	4113.07
	184	464509	639986	1253.88				1.52398e+06	2.09969e+06	4113.78
	185	464509	639987	1253.9				1.52398e+06	2.09969e+06	4113.83
	186	464510	639986	1254.45				1.52398e+06	2.09969e+06	4115.63
	187	464510	639987	1254.73				1.52398e+06	2.09969e+06	4116.58
	188	464510	639986	1255.34				1.52398e+06	2.09969e+06	4118.58
	189	464511	639985	1255.32				1.52398e+06	2.09969e+06	4118.49
	190	464511	639984	1255.16				1.52399e+06	2.09969e+06	4117.99
	191	464512	639984	1255.1				1.52399e+06	2.09968e+06	4117.77
	192	464511	639984	1254.76				1.52399e+06	2.09968e+06	4116.66
9	193	464507	639991	1253.42				1.52397e+06	2.09971e+06	4112.28
	194	464507	639991	1253.88				1.52397e+06	2.09971e+06	4113.79
	195	464508	639990	1254.2				1.52398e+06	2.09971e+06	4114.82
	196	464509	639990	1254.69				1.52398e+06	2.0997e+06	4116.45
	197	464509	639988	1254.59				1.52398e+06	2.0997e+06	4116.12
	198	464509	639988	1254.53				1.52398e+06	2.0997e+06	4115.91
	199	464509	639987	1254.44				1.52398e+06	2.0997e+06	4115.62
	200	464509	639987	1254.43				1.52398e+06	2.09969e+06	4115.58
	201	464509	639987	1254.21				1.52398e+06	2.09969e+06	4114.85
	202	464509	639987	1254.04				1.52398e+06	2.09969e+06	4114.3
	203	464508	639987	1253.42				1.52398e+06	2.0997e+06	4112.26
	204	464508	639988	1253.23				1.52398e+06	2.0997e+06	4111.65
	205	464507	639988	1253.04				1.52397e+06	2.0997e+06	4111.02
	206	464507	639989	1252.85				1.52397e+06	2.0997e+06	4110.41
	207	464506	639990	1252.66				1.52397e+06	2.0997e+06	4109.79
	208	464506	639990	1252.9				1.52397e+06	2.09971e+06	4110.56
	209	464506	639991	1253.27				1.52397e+06	2.09971e+06	4111.76
	210	464507	639991	1253.69				1.52397e+06	2.09971e+06	4113.15
10	211	464508	639996	1255.2				1.52398e+06	2.09972e+06	4118.11
	212	464508	639995	1254.78				1.52398e+06	2.09972e+06	4116.72
	213	464507	639995	1254.4				1.52397e+06	2.09972e+06	4115.48
	214	464507	639995	1254.17				1.52397e+06	2.09972e+06	4114.73
	215	464506	639996	1254.17				1.52397e+06	2.09972e+06	4114.72
	216	464506	639997	1254.21				1.52397e+06	2.09973e+06	4114.85
	217	464506	639997	1254.17				1.52397e+06	2.09973e+06	4114.73
	218	464505	639997	1254.27				1.52397e+06	2.09973e+06	4115.05
	219	464505	639999	1254.46				1.52397e+06	2.09973e+06	4115.69
	220	464504	639999	1254.05				1.52396e+06	2.09973e+06	4114.34
	221	464504	640000	1254.18				1.52396e+06	2.09974e+06	4114.75
	222	464504	640000	1254.32				1.52396e+06	2.09974e+06	4115.23
	223	464503	640000	1254.19				1.52396e+06	2.09974e+06	4114.79
	224	464503	640001	1254.05				1.52396e+06	2.09974e+06	4114.35
	225	464503	640001	1254.06				1.52396e+06	2.09974e+06	4114.36
	226	464502	640001	1253.69				1.52396e+06	2.09974e+06	4113.14
	227	464502	640002	1253.94				1.52396e+06	2.09974e+06	4113.98
	228	464503	640003	1254.38				1.52396e+06	2.09975e+06	4115.42
	229	464504	640002	1255.06				1.52396e+06	2.09975e+06	4117.64
	230	464505	640001	1255.53				1.52397e+06	2.09974e+06	4119.19
11	231	464498	640007	1252.42				1.52394e+06	2.09976e+06	4108.98
	232	464498	640005	1252.24				1.52394e+06	2.09976e+06	4108.41
	233	464498	640005	1251.96				1.52395e+06	2.09975e+06	4107.48
	234	464499	640004	1251.88				1.52395e+06	2.09975e+06	4107.23
	235	464498	640003	1251.39				1.52394e+06	2.09975e+06	4105.61
	236	464498	640004	1251.01				1.52394e+06	2.09975e+06	4104.37
	237	464497	640004	1250.74				1.52394e+06	2.09975e+06	4103.46
	238	464497	640004	1250.63				1.52394e+06	2.09975e+06	4103.12
	239	464496	640005	1250.56				1.52394e+06	2.09975e+06	4102.87
	240	464496	640005	1250.49				1.52394e+06	2.09975e+06	4102.67
	241	464495	640006	1250.22				1.52393e+06	2.09976e+06	4101.77
	242	464494	640006	1249.97				1.52393e+06	2.09976e+06	4100.95
	243	464494	640007	1249.69				1.52393e+06	2.09976e+06	4100.05
	244	464494	640007	1249.91				1.52393e+06	2.09976e+06	4100.76
	245	464494	640008	1250.31				1.52393e+06	2.09976e+06	4102.06
	246	464494	640009	1250.41				1.52393e+06	2.09977e+06	4102.39
	247	464495	640010	1250.68				1.52393e+06	2.09977e+06	4103.29
	248	464495	640010	1250.71				1.52393e+06	2.09977e+06	4103.38
	249	464495	640011	1250.6				1.52393e+06	2.09977e+06	4103.02
	250	464495	640011	1250.58				1.52393e+06	2.09977e+06	4102.94
	251	464495	640011	1250.98				1.52394e+06	2.09977e+06	4104.25
	252	464496	640009	1251.64				1.52394e+06	2.09977e+06	4106.45
	253	464497	640009	1251.96				1.52394e+06	2.09977e+06	4107.48
	254	464497	640008	1252.14				1.52394e+06	2.09976e+06	4108.07
	255	464498	640007	1252.4				1.52394e+06	2.09976e+06	4108.93
12	256	464492	640013	1249.26				1.52393e+06	2.09978e+06	4098.61
	257	464492	640013	1248.96				1.52392e+06	2.09978e+06	4097.65
	258	464492	640013	1248.74				1.52392e+06	2.09978e+06	4096.92
	259	464492	640014	1248.69				1.52392e+06	2.09978e+06	4096.76
	260	464492	640014	1248.83				1.52392e+06	2.09978e+06	4097.23
	261	464492	640014	1249.23				1.52392e+06	2.09978e+06	4098.51
13	262	464483	640036	1246.96				1.52389e+06	2.09986e+06	4091.07
	263	464483	640036	1246.69				1.52389e+06	2.09985e+06	4090.18
	264	464483	640035	1246.68				1.5239e+06	2.09985e+06	4090.16
	265	464484	640034	1246.7				1.5239e+06	2.09985e+06	4090.22
	266	464484	640034	1246.64				1.5239e+06	2.09985e+06	4090.04
	267	464484	640033	1246.4				1.5239e+06	2.09985e+06	4089.24
	268	464483	640034	1246.27				1.5239e+06	2.09985e+06	4088.8
	269	464483	640034	1246.49				1.52389e+06	2.09985e+06	4089.54
	270	464482	640035	1246.08				1.52389e+06	2.09985e+06	4088.2
	271	464482	640036	1246.03				1.52389e+06	2.09986e+06	4088.02
	272	464481	640037	1246.15				1.52389e+06	2.09986e+06	4088.43
	273	464481	640037	1245.96				1.52389e+06	2.09986e+06	4087.8
	274	464480	640038	1245.9				1.52388e+06	2.09986e+06	4087.61
	275	464480	640039	1245.93				1.52388e+06	2.09987e+06	4087.7
	276	464479	640039	1245.94				1.52388e+06	2.09987e+06	4087.73
	277	464479	640040	1245.94				1.52388e+06	2.09987e+06	4087.74
	278	464479	640041	1245.91				1.52388e+06	2.09987e+06	4087.63
	279	464480	640041	1246.31				1.52388e+06	2.09987e+06	4088.94
	280	464480	640040	1246.7				1.52388e+06	2.09987e+06	4090.22
	281	464481	640040	1246.88				1.52389e+06	2.09987e+06	4090.83
	282	464481	640039	1247.15				1.52389e+06	2.09986e+06	4091.71
	283	464482	640037	1247.09				1.52389e+06	2.09986e+06	4091.52
	284	464482	640036	1247.04				1.52389e+06	2.09986e+06	4091.35
14	285	464477	640039	1245.27				1.52388e+06	2.09986e+06	4085.53
	286	464477	640038	1245.08				1.52388e+06	2.09986e+06	4084.92
	287	464477	640037	1244.9				1.52387e+06	2.09986e+06	4084.31
	288	464476	640038	1244.79				1.52387e+06	2.09986e+06	4083.97
	289	464476	640038	1244.59				1.52387e+06	2.09986e+06	4083.3
	290	464475	640038	1244.4				1.52387e+06	2.09986e+06	4082.67
	291	464475	640038	1244.32				1.52387e+06	2.09986e+06	4082.42
	292	464474	640039	1244.33				1.52387e+06	2.09986e+06	4082.46
	293	464475	640039	1244.57				1.52387e+06	2.09987e+06	4083.22
	294	464476	640039	1244.99				1.52387e+06	2.09987e+06	4084.6
	295	464476	640039	1245.13				1.52387e+06	2.09987e+06	4085.06
	296	464476	640039	1245.12				1.52387e+06	2.09986e+06	4085.04
	297	464477	640038	1245.04				1.52387e+06	2.09986e+06	4084.78
	298	464477	640038	1245.23				1.52388e+06	2.09986e+06	4085.41
	299	464477	640038	1245.17				1.52388e+06	2.09986e+06	4085.2
15	300	464472	640041	1244.21				1.52386e+06	2.09987e+06	4082.05
	301	464472	640040	1244.02				1.52386e+06	2.09987e+06	4081.44
	302	464472	640040	1243.84				1.52386e+06	2.09987e+06	4080.85
	303	464472	640039	1243.86				1.52386e+06	2.09987e+06	4080.89
	304	464472	640039	1243.73				1.52386e+06	2.09986e+06	4080.46
	305	464472	640038	1243.48				1.52386e+06	2.09986e+06	4079.67
	306	464472	640038	1243.21				1.52386e+06	2.09986e+06	4078.77
	307	464471	640038	1243.02				1.52386e+06	2.09986e+06	4078.14
	308	464471	640038	1242.89				1.52385e+06	2.09986e+06	4077.72
	309	464470	640039	1242.84				1.52385e+06	2.09987e+06	4077.56
	310	464471	640039	1243.06				1.52385e+06	2.09987e+06	4078.29
	311	464471	640040	1243.43				1.52386e+06	2.09987e+06	4079.48
	312	464471	640041	1243.5				1.52385e+06	2.09987e+06	4079.73
	313	464471	640041	1243.7				1.52385e+06	2.09987e+06	4080.39
	314	464471	640042	1244.02				1.52386e+06	2.09987e+06	4081.42
	315	464472	640041	1244.18				1.52386e+06	2.09987e+06	4081.95
	316	464472	640041	1244.13				1.52386e+06	2.09987e+06	4081.78
16	317	464477	640044	1245.87				1.52387e+06	2.09988e+06	4087.51
	318	464476	640044	1245.62				1.52387e+06	2.09988e+06	4086.69
	319	464475	640044	1245.58				1.52387e+06	2.09988e+06	4086.55
	320	464475	640044	1245.26				1.52387e+06	2.09988e+06	4085.51
	321	464474	640044	1245.25				1.52387e+06	2.09988e+06	4085.47
	322	464474	640045	1245.23				1.52386e+06	2.09989e+06	4085.39
	323	464473	640046	1245.26				1.52386e+06	2.09989e+06	4085.5
	324	464472	640046	1245.06				1.52386e+06	2.09989e+06	4084.86
	325	464472	640047	1244.92				1.52386e+06	2.09989e+06	4084.38
	326	464471	640048	1244.92				1.52386e+06	2.09989e+06	4084.4
	327	464471	640049	1244.76				1.52385e+06	2.0999e+06	4083.85
	328	464470	640050	1244.71				1.52385e+06	2.0999e+06	4083.68
	329	464469	640051	1244.82				1.52385e+06	2.0999e+06	4084.06
	330	464469	640052	1244.92				1.52385e+06	2.09991e+06	4084.39
	331	464468	640053	1244.98				1.52385e+06	2.09991e+06	4084.6
	332	464468	640053	1244.98				1.52384e+06	2.09991e+06	4084.59
	333	464467	640054	1244.72				1.52384e+06	2.09992e+06	4083.74
	334	464466	640055	1244.57				1.52384e+06	2.09992e+06	4083.24
	335	464465	640056	1244.52				1.52384e+06	2.09992e+06	4083.07
	336	464465	640057	1244.43				1.52384e+06	2.09992e+06	4082.79
	337	464465	640057	1244.56				1.52384e+06	2.09993e+06	4083.21
	338	464466	640058	1244.98				1.52384e+06	2.09993e+06	4084.59
	339	464467	640057	1245.36				1.52384e+06	2.09992e+06	4085.82
	340	464468	640056	1245.65				1.52384e+06	2.09992e+06	4086.77
	341	464469	640055	1245.89				1.52385e+06	2.09992e+06	4087.57
	342	464470	640055	1246.1				1.52385e+06	2.09992e+06	4088.24
	343	464471	640054	1246.2				1.52385e+06	2.09991e+06	4088.58
	344	464472	640053	1246.33				1.52386e+06	2.09991e+06	4089.02
	345	464472	640052	1246.59				1.52386e+06	2.09991e+06	4089.86
	346	464474	640050	1246.71				1.52386e+06	2.0999e+06	4090.27
	347	464474	640049	1246.72				1.52387e+06	2.0999e+06	4090.3
	348	464475	640047	1246.66				1.52387e+06	2.09989e+06	4090.09
	349	464476	640046	1246.51				1.52387e+06	2.09989e+06	4089.59
	350	464476	640045	1246.24				1.52387e+06	2.09988e+06	4088.72
17	351	464464	640060	1244.01				1.52383e+06	2.09993e+06	4081.39
	352	464464	640060	1243.88				1.52383e+06	2.09994e+06	4080.96
	353	464463	640061	1243.58				1.52383e+06	2.09994e+06	4080
	354	464462	640062	1243.35				1.52383e+06	2.09994e+06	4079.23
	355	464462	640062	1243.12				1.52382e+06	2.09994e+06	4078.49
	356	464461	640063	1242.86				1.52382e+06	2.09994e+06	4077.63
	357	464461	640063	1242.89				1.52382e+06	2.09995e+06	4077.73
	358	464461	640063	1243.04				1.52382e+06	2.09995e+06	4078.22
	359	464462	640063	1243.28				1.52382e+06	2.09994e+06	4079.01
	360	464462	640062	1243.47				1.52383e+06	2.09994e+06	4079.64
	361	464463	640061	1243.75				1.52383e+06	2.09994e+06	4080.54
	362	464464	640060	1244.12				1.52383e+06	2.09994e+06	4081.75
	363	464465	640060	1244.13				1.52383e+06	2.09993e+06	4081.78
18	364	464456	640072	1241.88				1.5238e+06	2.09998e+06	4074.4
	365	464456	640072	1241.61				1.52381e+06	2.09997e+06	4073.51
	366	464455	640071	1241.34				1523804	2.09997e+06	4072.63
	367	464455	640071	1240.96				1.5238e+06	2.09997e+06	4071.4
	368	464454	640072	1240.99				1.5238e+06	2.09997e+06	4071.5
	369	464454	640072	1241.3				1.5238e+06	2.09997e+06	4072.52
	370	464454	640073	1241.25				1.5238e+06	2.09998e+06	4072.35
	371	464453	640073	1241.24				1.5238e+06	2.09998e+06	4072.32
	372	464453	640074	1241.1				1.52379e+06	2.09998e+06	4071.84
	373	464452	640075	1241.2				1.52379e+06	2.09998e+06	4072.17
	374	464451	640076	1241.17				1.52379e+06	2.09999e+06	4072.07
	375	464450	640077	1240.87				1.52379e+06	2.09999e+06	4071.11
	376	464450	640078	1240.72				1.52378e+06	2.09999e+06	4070.61
	377	464449	640079	1240.57				1.52378e+06	2.1e+06	4070.1
	378	464448	640080	1240.39				1.52378e+06	2.1e+06	4069.51
	379	464448	640080	1240.5				1.52378e+06	2.1e+06	4069.87
	380	464447	640081	1240.16				1.52378e+06	2.1e+06	4068.78
	381	464446	640082	1240.12				1.52377e+06	2.10001e+06	4068.63
	382	464445	640083	1239.83				1.52377e+06	2.10001e+06	4067.68
	383	464445	640084	1239.78				1.52377e+06	2.10001e+06	4067.51
	384	464444	640085	1239.67				1.52377e+06	2.10002e+06	4067.17
	385	464443	640085	1239.26				1.52376e+06	2.10002e+06	4065.8
	386	464442	640086	1238.93				1.52376e+06	2.10002e+06	4064.73
	387	464441	640087	1238.92				1.52376e+06	2.10002e+06	4064.7
	388	464438	640090	1239.07				1.52375e+06	2.10003e+06	4065.19
	389	464437	640092	1239.25				1.52374e+06	2.10004e+06	4065.77
	390	464435	640093	1239.11				1.52374e+06	2.10004e+06	4065.31
	391	464434	640095	1238.83				1.52373e+06	2.10005e+06	4064.39
	392	464436	640094	1239.13				1.52374e+06	2.10005e+06	4065.39
	393	464438	640092	1239.48				1.52375e+06	2.10004e+06	4066.52
	394	464440	640090	1239.66				1.52375e+06	2.10003e+06	4067.13
	395	464443	640087	1239.71				1.52376e+06	2.10002e+06	4067.29
	396	464447	640084	1240.19				1.52378e+06	2.10001e+06	4068.88
	397	464449	640081	1241.03				1.52378e+06	2.1e+06	4071.61
	398	464452	640077	1241.55				1.52379e+06	2.09999e+06	4073.31
	399	464454	640075	1241.95				1.5238e+06	2.09998e+06	4074.65
	400	464456	640073	1241.93				1.5238e+06	2.09998e+06	4074.57

## Sheet: Sheet5
Injectite #5
Segment #	GPS Point #	Northings (m)	Eastings (m)	Elevation (m)				Code	Precision (m)
1	1	460706	642555	1334.21				5	0.0109831
	2	460706	642555	1334.23				5	0.0107283
	3	460705	642556	1334.26				5	0.0105297
	4	460705	642556	1334.26				5	0.0107191
	5	460705	642557	1334.19				5	0.0106005
	6	460705	642557	1334.24				5	0.0111183
	7	460705	642557	1334.32				5	0.0120437
	8	460704	642558	1334.39				5	0.0120804
	9	460704	642558	1334.38				5	0.011828
	10	460703	642559	1334.35				5	0.0117938
	11	460703	642559	1334.32				5	0.0128361
	12	460702	642560	1334.24				5	0.0118294
	13	460702	642561	1334.26				5	0.0122129
	14	460701	642561	1334.32				5	0.0116606
	15	460701	642562	1334.27				5	0.0112755
	16	460700	642562	1334.21				5	0.0119855
	17	460700	642563	1334.15				5	0.0112777
	18	460699	642564	1334.22				5	0.0111656
	19	460699	642565	1334.3				5	0.0122031
	20	460698	642566	1334.29				5	0.011899
	21	460697	642567	1333.95				5	0.0108097
	22	460697	642568	1333.72				5	0.0111625
	23	460696	642568	1333.58				5	0.0103646
	24	460696	642569	1333.46				5	0.0108115
	25	460695	642569	1333.32				5	0.0106274
	26	460695	642570	1333.05				5	0.0113291
	27	460694	642571	1332.62				5	0.0106638
	28	460694	642571	1332.34				5	0.0112098
	29	460694	642572	1332.32				5	0.0105681
	30	460694	642572	1332.58				5	0.0110577
	31	460695	642571	1333.08				5	0.0127148
	32	460695	642570	1333.36				5	0.0129601
	33	460696	642570	1333.61				5	0.0107937
	34	460696	642569	1333.67				5	0.0112616
	35	460697	642568	1333.83				5	0.0109932
	36	460697	642568	1333.91				5	0.0122378
	37	460698	642567	1333.94				5	0.0110788
	38	460699	642566	1334.23				5	0.0123798
	39	460699	642566	1334.32				5	0.0109267
	40	460700	642564	1334.43				5	0.0126983
	41	460701	642563	1334.47				5	0.0114532
	42	460701	642562	1334.47				5	0.0115949
	43	460702	642562	1334.59				5	0.0117113
	44	460702	642561	1334.58				5	0.0108166
	45	460703	642560	1334.64				5	0.0102876
	46	460704	642559	1334.66				5	0.0122776
	47	460705	642558	1334.69				5	0.0136588
	48	460705	642557	1334.67				5	0.0122527
	49	460706	642556	1334.56				5	0.0138635
	50	460706	642556	1334.49				5	0.0131324
	51	460707	642554	1334.59				5	0.0134942
	52	460708	642553	1334.79				5	0.011655
	53	460708	642553	1334.8				5	0.0119861
	54	460709	642552	1334.91				5	0.0146016
	55	460709	642552	1334.9				5	0.0140522
	56	460709	642551	1334.59				5	0.0122424
	57	460709	642551	1334.61				5	0.0113749
	58	460708	642552	1334.69				5	0.013818
	59	460707	642553	1334.47				5	0.013067
	60	460706	642555	1334.25				5	0.0110742
	61	460706	642556	1334.23				5	0.0121002
	62	460705	642556	1334.26				5	0.0121649
2	63	460696	642572	1333.32				5	0.0113217
	64	460695	642572	1333.27				5	0.0141119
	65	460695	642573	1333.01				5	0.0117711
	66	460694	642573	1332.77				5	0.0117088
	67	460694	642573	1332.22				5	0.0108794
	68	460693	642574	1331.78				5	0.0114623
	69	460693	642574	1331.81				5	0.011754
	70	460693	642575	1331.68				5	0.0127294
	71	460692	642576	1331.57				5	0.00994514
	72	460692	642576	1331.4				5	0.00940237
	73	460692	642576	1331.45				5	0.0102881
	74	460692	642576	1331.79				5	0.0101153
	75	460693	642576	1331.89				5	0.0113032
	76	460693	642575	1332.08				5	0.0122417
	77	460693	642575	1332.36				5	0.0113568
	78	460694	642574	1332.5				5	0.0105045
	79	460694	642574	1332.92				5	0.010402
	80	460694	642573	1333.02				5	0.0105324
	81	460695	642573	1333.06				5	0.00967453
	82	460695	642572	1333.1				5	0.0102934
	83	460696	642572	1333.13				5	0.00986652
	84	460696	642571	1333.15				5	0.0115287
	85	460696	642571	1333.21				5	0.0089927
	86	460696	642571	1333.3				5	0.00841819
	87	460696	642571	1333.34				5	0.00989525
	88	460695	642572	1333.33				5	0.00974302
3	89	460691	642577	1331.06				5	0.00845664
	90	460691	642578	1330.98				5	0.00774923
	91	460691	642578	1330.98				5	0.00885843
	92	460691	642579	1331				5	0.0090136
	93	460691	642579	1331.17				5	0.00920934
	94	460691	642578	1331.33				5	0.010049
	95	460691	642578	1331.44				5	0.00783917
	96	460691	642577	1331.47				5	0.00883952
	97	460691	642577	1331.27				5	0.00884165
	98	460691	642577	1331.08				5	0.00771664
	99	460691	642578	1331.04				5	0.0100826
4	100	460683	642580	1328.19				5	0.0083715
	101	460683	642580	1328.16				5	0.00907231
	102	460683	642581	1328.17				5	0.00773471
	103	460682	642581	1328.06				5	0.00814641
	104	460682	642582	1327.89				5	0.00822143
	105	460682	642582	1327.78				5	0.00907062
	106	460682	642582	1327.48				5	0.00793516
	107	460682	642583	1327.25				5	0.00962277
	108	460681	642584	1327.04				5	0.00759681
	109	460681	642584	1326.62				5	0.00797269
	110	460681	642585	1326.41				5	0.0079332
	111	460681	642585	1326.44				5	0.00801374
	112	460681	642585	1326.79				5	0.00812496
	113	460682	642583	1327.43				5	0.00924087
	114	460682	642582	1328				5	0.00876285
	115	460683	642582	1328.33				5	0.00797703
	116	460683	642581	1328.41				5	0.00880973
	117	460683	642580	1328.33				5	0.00850157
	118	460683	642580	1328.15				5	0.00881579

## Sheet: Sheet6
Injectite #6
Segment #	GPS Point #	Northings (m)	Eastings (m)	Elevation (m)				Code	Precision (m)
1	126	460772	642493	1338.73				6	0.00812569
	127	460772	642493	1339.06				6	0.0085306
	128	460771	642494	1339.16				6	0.00881534
	129	460771	642495	1339.18				6	0.00851237
	130	460770	642495	1339.04				6	0.00879231
	131	460770	642497	1338.93				6	0.00901213
	132	460769	642497	1338.97				6	0.0084795
	133	460769	642498	1338.9				6	0.00871287
	134	460769	642500	1338.77				6	0.00879595
	135	460769	642500	1338.59				6	0.00956081
	136	460769	642500	1338.65				6	0.00891126
	137	460769	642499	1338.66				6	0.00901474
	138	460770	642498	1338.53				6	0.00980892
	139	460770	642498	1338.49				6	0.00933684
	140	460771	642497	1338.59				6	0.0116101
	141	460771	642496	1338.83				6	0.00970171
	142	460771	642495	1338.9				6	0.00867193
	143	460771	642494	1338.76				6	0.00817031
	144	460772	642494	1338.74				6	0.00872658
	145	460772	642493	1338.71				6	0.00919851
2	146	460765	642501	1338.69				6	0.00920868
	147	460764	642502	1338.68				6	0.00888714
	148	460763	642503	1338.71				6	0.00832257
	149	460763	642504	1338.72				6	0.00889339
	150	460762	642505	1338.63				6	0.00902268
	151	460761	642506	1338.61				6	0.00857579
	152	460760	642509	1338.29				6	0.00838727
	153	460759	642510	1338.24				6	0.00972358
	154	460758	642511	1338.16				6	0.00822462
	155	460758	642513	1338.13				6	0.00823631
	156	460757	642513	1337.94				6	0.0080207
	157	460755	642516	1337.86				6	0.00975714
	158	460754	642517	1337.93				6	0.00943227
	159	460754	642518	1337.75				6	0.00806811
	160	460753	642520	1337.62				6	0.00859533
	161	460752	642522	1337.46				6	0.00815459
	162	460751	642523	1337.28				6	0.00925774
	163	460750	642525	1337.16				6	0.00783874
	164	460750	642526	1337.14				6	0.00808876
	165	460751	642525	1337.06				6	0.00901406
	166	460751	642525	1337.13				6	0.0078392
	167	460751	642524	1337.23				6	0.00773843
	168	460752	642523	1337.21				6	0.00844473
	169	460753	642521	1337.45				6	0.00856534
	170	460754	642519	1337.65				6	0.00909406
	171	460755	642518	1337.66				6	0.00882889
	172	460756	642516	1337.67				6	0.00863598
	173	460756	642515	1337.77				6	0.00841731
	174	460758	642514	1337.86				6	0.00760243
	175	460758	642512	1337.95				6	0.00843159
	176	460759	642511	1338.04				6	0.0106842
	177	460759	642510	1338.09				6	0.00954952
	178	460760	642509	1338.12				6	0.00845718
	179	460761	642508	1338.19				6	0.0121744
	180	460761	642507	1338.22				6	0.00878923
	181	460762	642506	1338.26				6	0.00981723
	182	460763	642505	1338.31				6	0.00698489
	183	460763	642504	1338.47				6	0.00845766
	184	460764	642503	1338.5				6	0.00867729
	185	460765	642502	1338.55				6	0.00783067
	186	460765	642501	1338.62				6	0.00791587
	187	460766	642501	1338.6				6	0.00850514
	188	460765	642501	1338.7				6	0.00827194
	189	460764	642502	1338.68				6	0.0139189

## Sheet: Sheet7
Injectite #7
Segment #	GPS Point #	Northings (m)	Eastings (m)	Elevation (m)				Code	Precision (m)
1	190	460799	642556	1332.22				7	0.0108434
	191	460798	642557	1332.4				7	0.0112891
	192	460798	642559	1332.33				7	0.0116269
	193	460797	642560	1332.17				7	0.0144586
	194	460796	642561	1332.01				7	0.011629
	195	460796	642563	1331.78				7	0.0114391
	196	460795	642564	1331.54				7	0.011173
	197	460795	642565	1331.26				7	0.0115904
	198	460794	642567	1330.8				7	0.0101534
	199	460794	642568	1330.17				7	0.0128771
	200	460793	642569	1329.65				7	0.014098
	201	460793	642570	1329.05				7	0.0106754
	202	460793	642571	1328.54				7	0.0153425
	203	460794	642572	1328.01				7	0.0119019
	204	460795	642572	1327.79				7	0.0163624
	205	460797	642572	1327.72				7	0.0123674
	206	460798	642571	1327.37				7	0.0121632
	207	460798	642569	1327.45				7	0.0108311
	208	460798	642568	1327.76				7	0.0109039
	209	460798	642567	1328.16				7	0.0100306
	210	460798	642566	1328.69				7	0.010761
	211	460798	642564	1329.51				7	0.0104284
	212	460798	642563	1330.53				7	0.0121329
	213	460798	642562	1331.01				7	0.0102124
	214	460799	642560	1330.66				7	0.0101859
	215	460800	642559	1330.76				7	0.00985319
	216	460800	642558	1331.04				7	0.0110623
	217	460800	642557	1331.28				7	0.0108559
	218	460800	642557	1331.81				7	0.0116931
	219	460799	642556	1332.25				7	0.0119353
2	220	460797	642586	1318.29				7	0.0140887
	221	460797	642585	1318.31				7	0.0149522
	222	460798	642585	1318.37				7	0.0137687
	223	460798	642585	1317.96				7	0.014747
	224	460799	642584	1318.17				7	0.0152243
	225	460799	642584	1318.55				7	0.0138273
	226	460799	642583	1319.1				7	0.0121331
	227	460799	642582	1319.65				7	0.0132725
	228	460800	642581	1320.15				7	0.014986
	229	460800	642580	1320.41				7	0.0140342
	230	460800	642579	1320.87				7	0.012889
	231	460800	642577	1321.43				7	0.0154776
	232	460801	642577	1321.6				7	0.0161432
	233	460801	642576	1321.88				7	0.0132277
	234	460801	642575	1322.15				7	0.0142875
	235	460802	642574	1322.31				7	0.0143495
	236	460802	642573	1322.47				7	0.014199
	237	460803	642571	1322.95				7	0.0145009
	238	460802	642570	1323.93				7	0.0166032
	239	460802	642569	1324.69				7	0.0151732
	240	460801	642569	1325.82				7	0.0139353
	241	460799	642568	1326.83				7	0.0141978
	242	460799	642569	1327.12				7	0.011524
	243	460798	642571	1327.1				7	0.011029
	244	460797	642572	1327.21				7	0.0106053
	245	460797	642573	1326.94				7	0.0122614
	246	460797	642574	1326.03				7	0.0108089
	247	460797	642576	1325.3				7	0.01176
	248	460797	642577	1324.96				7	0.0115245
	249	460796	642578	1324.6				7	0.0116683
	250	460796	642579	1324.35				7	0.0147428
	251	460795	642579	1323.9				7	0.0129849
	252	460795	642580	1323.43				7	0.0125551
	253	460795	642581	1322.89				7	0.0113149
	254	460795	642582	1322.42				7	0.0143867
	255	460794	642583	1321.89				7	0.0113983
	256	460794	642584	1321.51				7	0.0123441
	257	460794	642584	1321.15				7	0.0131443
	258	460794	642585	1320.69				7	0.0146287
	259	460794	642585	1320.18				7	0.0114345
	260	460794	642586	1319.69				7	0.0129796
	261	460794	642587	1319.09				7	0.011637
	262	460795	642587	1318.66				7	0.0120861
	263	460796	642586	1318.59				7	0.01281
	264	460796	642586	1318.26				7	0.0131022
	265	460797	642586	1318.25				7	0.0121519
3	266	460783	642600	1314.91				7	0.0133476
	267	460783	642600	1314.49				7	0.0129955
	268	460783	642601	1314.09				7	0.0153508
	269	460784	642601	1314.02				7	0.0132454
	270	460784	642600	1313.91				7	0.0133297
	271	460785	642600	1314.11				7	0.0113605
	272	460786	642599	1314.21				7	0.012268
	273	460786	642598	1314.53				7	0.0137528
	274	460787	642597	1314.88				7	0.0118094
	275	460787	642596	1315.2				7	0.0142157
	276	460788	642596	1315.42				7	0.0136659
	277	460788	642595	1315.73				7	0.0134484
	278	460790	642593	1316.21				7	0.0166761
	279	460790	642592	1316.91				7	0.0146183
	280	460789	642592	1317.48				7	0.0134157
	281	460789	642592	1317.57				7	0.0123771
	282	460788	642593	1317.66				7	0.0130158
	283	460787	642594	1317.49				7	0.0128626
	284	460786	642595	1316.51				7	0.011178
	285	460785	642596	1316.34				7	0.012393
	286	460785	642597	1316.26				7	0.01182
	287	460784	642598	1315.77				7	0.0109512
	288	460784	642599	1315.3				7	0.0119387
	289	460783	642600	1315.11				7	0.0141405
4	290	460780	642604	1313.84				7	0.0126549
	291	460779	642605	1313.69				7	0.0131762
	292	460779	642606	1313.48				7	0.0146451
	293	460778	642607	1313.23				7	0.0139182
	294	460778	642608	1312.92				7	0.0136448
	295	460778	642608	1312.41				7	0.0106686
	296	460778	642609	1312.11				7	0.0129419
	297	460778	642609	1311.76				7	0.0138679
	298	460779	642609	1311.41				7	0.0138945
	299	460779	642610	1311.3				7	0.012918
	300	460780	642609	1311.28				7	0.0140833
	301	460780	642609	1311.48				7	0.0141915
	302	460781	642608	1311.86				7	0.0135176
	303	460781	642607	1312.29				7	0.0128437
	304	460781	642606	1312.71				7	0.013683
	305	460781	642605	1313.02				7	0.0118887
	306	460781	642604	1313.36				7	0.011486
	307	460780	642604	1313.72				7	0.0132
	308	460780	642604	1313.88				7	0.015367
5	309	460776	642611	1311.2				7	0.0114417
	310	460776	642611	1311.42				7	0.0117039
	311	460775	642612	1311.48				7	0.0137295
	312	460774	642613	1310.93				7	0.0122543
	313	460774	642614	1310.56				7	0.0120163
	314	460775	642614	1310.42				7	0.0129287
	315	460776	642614	1310.43				7	0.0150349
	316	460776	642613	1310.71				7	0.0136561
	317	460776	642612	1310.88				7	0.0123443
	318	460776	642612	1311.14				7	0.0131937
	319	460776	642611	1311.08				7	0.01429
	320	460776	642611	1311.14				7	0.0115274
6	321	460767	642624	1308.71				7	0.0136816
	322	460768	642625	1308.41				7	0.0145291
	323	460768	642625	1308.02				7	0.0136481
	324	460768	642626	1307.67				7	0.0138521
	325	460769	642625	1307.85				7	0.0139328
	326	460769	642624	1308.04				7	0.0111434
	327	460769	642624	1308.3				7	0.0121092
	328	460769	642623	1308.54				7	0.0123785
	329	460770	642622	1308.86				7	0.0119783
	330	460769	642622	1309.3				7	0.0126972
	331	460769	642621	1309.43				7	0.0128555
	332	460770	642620	1309.37				7	0.0129959
	333	460770	642620	1309.58				7	0.012815
	334	460770	642619	1309.77				7	0.0117283
	335	460771	642619	1309.82				7	0.0127557
	336	460771	642618	1309.54				7	0.0117266
	337	460771	642617	1309.69				7	0.0124028
	338	460772	642617	1309.88				7	0.0126336
	339	460772	642616	1310.21				7	0.0136904
	340	460771	642616	1310.43				7	0.0134159
	341	460770	642617	1310.51				7	0.0132323
	342	460770	642617	1310.7				7	0.0128773
	343	460769	642618	1310.6				7	0.0109989
	344	460768	642619	1310.53				7	0.0113245
	345	460768	642620	1310.43				7	0.0123655
	346	460768	642621	1310.19				7	0.0111031
	347	460768	642622	1309.93				7	0.0128134
	348	460768	642622	1309.65				7	0.0132164
	349	460767	642623	1309.29				7	0.0123089
	350	460767	642624	1308.91				7	0.0105778
7	351	460762	642631	1306.95				7	0.0138901
	352	460761	642632	1306.85				7	0.012978
	353	460760	642633	1306.77				7	0.0122214
	354	460760	642634	1306.46				7	0.0160591
	355	460760	642634	1306.18				7	0.0133882
	356	460761	642634	1305.73				7	0.0163069
	357	460762	642634	1305.95				7	0.0138687
	358	460762	642633	1306				7	0.0142938
	359	460763	642632	1306.06				7	0.0139898
	360	460763	642631	1306.37				7	0.013602
	361	460762	642631	1306.81				7	0.0130212
	362	460761	642631	1307				7	0.0132088
8	363	460760	642636	1305.64				7	0.0119745
	364	460759	642637	1305.51				7	0.0122664
	365	460759	642637	1305.3				7	0.0132908
	366	460760	642637	1305.31				7	0.0154998
	367	460760	642637	1305.33				7	0.0140671
	368	460760	642636	1305.48				7	0.0150749
	369	460760	642636	1305.64				7	0.0152322
9	370	460758	642639	1304.96				7	0.0128664
	371	460758	642640	1304.89				7	0.013023
	372	460758	642640	1304.69				7	0.0129037
	373	460758	642641	1304.46				7	0.012698
	374	460758	642643	1304.16				7	0.0164409
	375	460758	642644	1303.86				7	0.0131909
	376	460757	642645	1303.5				7	0.0129545
	377	460758	642646	1303.13				7	0.0125312
	378	460758	642646	1302.89				7	0.0130975
	379	460759	642645	1303.1				7	0.0137373
	380	460759	642644	1303.25				7	0.0131629
	381	460759	642643	1303.6				7	0.0143476
	382	460760	642642	1303.82				7	0.0161972
	383	460760	642641	1304.18				7	0.0156847
	384	460760	642640	1304.49				7	0.0162269
	385	460760	642639	1304.64				7	0.0146834
	386	460760	642638	1304.88				7	0.0157769
	387	460759	642638	1305.04				7	0.0124521
	370	460758	642639	1304.96				7	0.0128664
10	388	460756	642648	1302.55				7	0.0128243
	389	460755	642649	1302.62				7	0.0142994
	390	460755	642650	1302.26				7	0.0144489
	391	460754	642651	1302.04				7	0.012453
	392	460753	642652	1301.8				7	0.0122993
	393	460752	642653	1301.77				7	0.0147903
	394	460752	642654	1301.7				7	0.0131721
	395	460751	642655	1301.51				7	0.0121544
	396	460750	642656	1301.39				7	0.0131888
	397	460750	642657	1301.32				7	0.0141987
	398	460749	642658	1301.25				7	0.0136315
	399	460748	642660	1301.1				7	0.0129778
	400	460748	642662	1300.96				7	0.0140593
	401	460747	642663	1300.75				7	0.0149029
	402	460747	642665	1300.51				7	0.0124584
	403	460746	642666	1300.51				7	0.0130577
	404	460746	642667	1300.33				7	0.0130138
	405	460746	642669	1300.06				7	0.0134476
	406	460746	642670	1299.7				7	0.0110526
	407	460747	642670	1299.45				7	0.0130553
	408	460748	642669	1299.58				7	0.0165851
	409	460748	642668	1299.75				7	0.0129376
	410	460748	642667	1299.91				7	0.0132281
	411	460749	642665	1300.02				7	0.0133315
	412	460749	642664	1300.05				7	0.012376
	413	460750	642662	1300.05				7	0.0124891
	414	460750	642661	1300.26				7	0.012111
	415	460751	642660	1300.3				7	0.0120761
	416	460751	642659	1300.46				7	0.0123175
	417	460752	642658	1300.64				7	0.0124166
	418	460752	642656	1300.67				7	0.0137748
	419	460753	642655	1301.02				7	0.0122266
	420	460753	642654	1301.22				7	0.0115873
	421	460754	642653	1301.61				7	0.0128055
	422	460755	642652	1301.44				7	0.011562
	423	460756	642651	1301.7				7	0.0114117
	424	460756	642650	1301.79				7	0.011188
	425	460757	642648	1302.08				7	0.0122596
	426	460757	642647	1302.41				7	0.0117579
	427	460756	642648	1302.6				7	0.0111682
11	428	460745	642671	1299.68				7	0.0110527
	429	460745	642672	1299.7				7	0.0107807
	430	460744	642673	1299.2				7	0.0115346
	431	460745	642674	1298.74				7	0.0112023
	432	460746	642674	1298.62				7	0.0116041
	433	460747	642673	1298.44				7	0.0102797
	434	460747	642672	1298.87				7	0.0119698
	435	460746	642672	1299.18				7	0.0104121
	436	460746	642671	1299.62				7	0.0125481
	437	460745	642671	1299.74				7	0.00977564
12	438	460747	642678	1297.55				7	0.011027
	439	460747	642679	1297.57				7	0.0104157
	440	460747	642680	1297.38				7	0.0107052
	441	460747	642680	1297				7	0.0101125
	442	460747	642681	1296.17				7	0.0124464
	443	460748	642681	1295.65				7	0.0113194
	444	460748	642681	1295.46				7	0.01095
	445	460749	642680	1295.71				7	0.0124548
	446	460749	642679	1296.12				7	0.0109007
	447	460748	642679	1296.52				7	0.0134075
	448	460748	642678	1296.75				7	0.0112692
	449	460748	642678	1297.03				7	0.0122327
	450	460747	642678	1297.43				7	0.010702
13	451	460745	642684	1294.71				7	0.0101777
	452	460745	642685	1294.31				7	0.011327
	453	460745	642684	1294.23				7	0.0106988
	454	460746	642684	1294.51				7	0.0101426
	455	460746	642684	1294.56				7	0.0101177
	456	460746	642683	1294.54				7	0.0110557
	457	460747	642683	1294.78				7	0.010351
	458	460746	642683	1294.97				7	0.0107183
	459	460746	642683	1294.88				7	0.010349
	460	460746	642684	1294.89				7	0.0107984
	461	460745	642684	1294.81				7	0.0110521
	462	460745	642684	1294.56				7	0.0110656

## Sheet: Sheet8
Injectite #8
Segment #	GPS Point #	Northings (m)	Eastings (m)	Elevation (m)				Code	Precision (m)
1	1	458985	643880	1279.93				8	0.00946841
	2	458984	643879	1280.25				8	0.00974077
	3	458984	643879	1280.41				8	0.0116992
	4	458982	643878	1280.66				8	0.00986213
	5	458982	643878	1280.83				8	0.0105306
	6	458981	643879	1280.99				8	0.00995497
	7	458980	643878	1281.16				8	0.0104511
	8	458979	643878	1281.44				8	0.00990805
	9	458979	643878	1281.63				8	0.010569
	10	458978	643878	1281.74				8	0.0104148
	11	458977	643879	1281.5				8	0.0107956
	12	458977	643879	1281.26				8	0.0110373
	13	458978	643880	1281.05				8	0.0117668
	14	458979	643880	1280.94				8	0.01111
	15	458980	643879	1280.99				8	0.0102418
	16	458981	643879	1280.98				8	0.0105509
	17	458982	643879	1280.88				8	0.00945749
	18	458981	643881	1280.43				8	0.0103544
	19	458982	643880	1280.36				8	0.0106498
	20	458983	643880	1280.24				8	0.010533
	21	458983	643881	1280.11				8	0.0102551
	22	458984	643880	1280.03				8	0.00933236
	23	458985	643880	1279.96				8	0.0088156
2	24	458978	643877	1281.63				8	0.0100071
	25	458979	643876	1281.62				8	0.0114339
	26	458978	643876	1281.69				8	0.0118734
	27	458978	643875	1281.89				8	0.00983816
	28	458977	643875	1282.07				8	0.0105071
	29	458976	643876	1282.22				8	0.00993133
	30	458976	643876	1282.27				8	0.0105415
	31	458976	643877	1282.3				8	0.0103192
	32	458975	643877	1282.31				8	0.00927974
	33	458974	643877	1282.41				8	0.01025
	34	458974	643877	1282.45				8	0.00926869
	35	458974	643878	1282.55				8	0.00967331
	36	458973	643878	1282.59				8	0.0102477
	37	458972	643878	1282.58				8	0.0108081
	38	458971	643879	1282.43				8	0.008498
	39	458971	643879	1282.31				8	0.00955792
	40	458970	643879	1282.01				8	0.00947425
	41	458969	643879	1281.76				8	0.0113064
	42	458969	643879	1281.68				8	0.0113172
	43	458970	643880	1281.54				8	0.0109294
	44	458970	643880	1281.36				8	0.00993098
	45	458971	643880	1281.42				8	0.0112473
	46	458972	643880	1281.53				8	0.00956839
	47	458972	643879	1281.55				8	0.00980002
	48	458973	643879	1281.56				8	0.00911239
	49	458973	643879	1281.56				8	0.00964145
	50	458974	643879	1281.52				8	0.00948895
	51	458975	643878	1281.59				8	0.00968413
	52	458975	643878	1281.57				8	0.00862228
	53	458976	643878	1281.6				8	0.00961802
	54	458977	643878	1281.74				8	0.0105626
	55	458977	643878	1281.79				8	0.00934805
	56	458977	643878	1281.8				8	0.00979855
	57	458978	643878	1281.77				8	0.00903809
	58	458978	643877	1281.66				8	0.0098998
3	59	458966	643879	1282.58				8	0.0120023
	60	458966	643879	1282.79				8	0.0114826
	61	458965	643878	1282.92				8	0.0106252
	62	458964	643878	1283.07				8	0.0112468
	63	458963	643878	1283.26				8	0.0102553
	64	458963	643877	1283.4				8	0.0106846
	65	458962	643877	1283.5				8	0.0116256
	66	458961	643877	1283.62				8	0.0125028
	67	458961	643877	1283.68				8	0.010875
	68	458960	643877	1283.78				8	0.0112864
	69	458960	643877	1283.86				8	0.0111422
	70	458959	643877	1283.89				8	0.0110574
	71	458958	643877	1284.05				8	0.0115027
	72	458958	643877	1284.09				8	0.0107579
	73	458957	643878	1283.96				8	0.0107234
	74	458958	643878	1283.81				8	0.0101839
	75	458958	643878	1283.73				8	0.00990132
	76	458959	643878	1283.64				8	0.0108697
	77	458959	643878	1283.56				8	0.0102651
	78	458960	643878	1283.47				8	0.0107814
	79	458961	643878	1283.39				8	0.0113066
	80	458961	643878	1283.21				8	0.00994121
	81	458962	643879	1283.17				8	0.0106998
	82	458962	643878	1283.09				8	0.0118747
	83	458963	643879	1282.93				8	0.0104265
	84	458964	643879	1282.9				8	0.0112908
	85	458964	643879	1282.7				8	0.0119994
	86	458965	643879	1282.58				8	0.0111568
	87	458965	643880	1282.47				8	0.0113795
	88	458966	643879	1282.58				8	0.0100799
4	89	458958	643874	1284.54				8	0.0110563
	90	458958	643874	1284.78				8	0.012983
	91	458958	643874	1284.87				8	0.010924
	92	458958	643873	1284.88				8	0.0130146
	93	458957	643873	1285.07				8	0.0113333
	94	458956	643872	1285.18				8	0.0107917
	95	458956	643872	1285.41				8	0.0124308
	96	458955	643872	1285.57				8	0.0111123
	97	458955	643872	1285.67				8	0.0111626
	98	458954	643872	1285.79				8	0.0110688
	99	458954	643872	1285.91				8	0.0105093
	100	458953	643872	1285.98				8	0.0144935
	101	458954	643873	1285.81				8	0.012421
	102	458954	643873	1285.64				8	0.0130151
	103	458955	643873	1285.49				8	0.0112912
	104	458955	643873	1285.28				8	0.0118484
	105	458956	643873	1285.25				8	0.01032
	106	458956	643873	1285.13				8	0.0102867
	107	458957	643874	1285.04				8	0.0107574
	108	458957	643874	1284.86				8	0.0106343
	109	458957	643875	1284.75				8	0.0120481
	110	458957	643875	1284.65				8	0.0112754
	111	458958	643875	1284.54				8	0.0108733
5	112	458949	643873	1286.71				8	0.0113026
	113	458949	643872	1287.01				8	0.0127612
	114	458948	643872	1287.31				8	0.0110725
	115	458948	643872	1287.52				8	0.0134589
	116	458947	643872	1287.69				8	0.0141276
	117	458947	643872	1287.88				8	0.01491
	118	458946	643871	1288.14				8	0.0125633
	119	458946	643871	1288.35				8	0.0131547
	120	458945	643871	1288.49				8	0.012551
	121	458945	643870	1288.75				8	0.0167191
	122	458944	643870	1288.9				8	0.0109044
	123	458944	643870	1289.08				8	0.0127015
	124	458944	643870	1289.19				8	0.0138487
	125	458943	643870	1289.32				8	0.0111659
	126	458943	643870	1289.44				8	0.0123741
	127	458942	643870	1289.57				8	0.0135705
	128	458942	643870	1289.73				8	0.0128142
	129	458941	643870	1289.86				8	0.0113089
	130	458941	643869	1289.94				8	0.0126826
	131	458941	643869	1289.92				8	0.0126334
	132	458940	643868	1290.05				8	0.0124343
	133	458940	643868	1290.12				8	0.0106423
	134	458939	643868	1290.22				8	0.011631
	135	458939	643869	1290.27				8	0.0111192
	136	458938	643869	1290.33				8	0.0112211
	137	458938	643869	1290.39				8	0.0115882
	138	458938	643869	1290.4				8	0.0132147
	139	458938	643869	1290.34				8	0.0116614
	140	458938	643870	1290.21				8	0.0120321
	141	458938	643870	1290.17				8	0.0105218
	142	458939	643870	1290.05				8	0.0115485
	143	458939	643870	1289.84				8	0.00936812
	144	458940	643870	1289.68				8	0.00984407
	145	458940	643871	1289.62				8	0.0112039
	146	458941	643871	1289.48				8	0.00967438
	147	458941	643871	1289.28				8	0.00991588
	148	458942	643871	1289.21				8	0.011306
	149	458942	643871	1289.06				8	0.0104045
	150	458942	643871	1288.94				8	0.0107944
	151	458943	643872	1288.81				8	0.0103774
	152	458943	643872	1288.59				8	0.00982252
	153	458944	643872	1288.36				8	0.0102949
	154	458944	643872	1288.12				8	0.0118015
	155	458945	643872	1287.9				8	0.0118035
	156	458945	643873	1287.74				8	0.0111445
	157	458946	643873	1287.49				8	0.0104111
	158	458946	643873	1287.38				8	0.00908506
	159	458946	643873	1287.16				8	0.0102783
	160	458947	643873	1287				8	0.0109017
	161	458947	643874	1286.71				8	0.0113882
	162	458948	643874	1286.63				8	0.0113645
	163	458948	643874	1286.59				8	0.00955447
6	164	458932	643869	1291.64				8	0.0103374
	165	458932	643869	1291.88				8	0.0103648
	166	458932	643868	1292.15				8	0.00969493
	167	458932	643868	1292.68				8	0.00945831
	168	458931	643868	1293.01				8	0.0100825
	169	458931	643867	1293.21				8	0.00977552
	170	458930	643867	1293.4				8	0.0104652
	171	458930	643867	1293.73				8	0.0100193
	172	458929	643867	1294.18				8	0.0103377
	173	458929	643866	1294.31				8	0.0107229
	174	458928	643866	1294.5				8	0.01002
	175	458928	643866	1294.61				8	0.0107818
	176	458928	643866	1294.83				8	0.00990304
	177	458928	643866	1294.99				8	0.0106706
	178	458928	643866	1295.13				8	0.00829941
	179	458927	643867	1295.17				8	0.00922128
	180	458927	643867	1295.05				8	0.010015
	181	458927	643868	1294.64				8	0.00939074
	182	458927	643868	1294.4				8	0.00933797
	183	458927	643868	1294.11				8	0.0097704
	184	458927	643868	1293.86				8	0.0101433
	185	458928	643869	1293.61				8	0.00883673
	186	458928	643869	1293.42				8	0.00903742
	187	458929	643868	1293.3				8	0.00907825
	188	458929	643868	1293.1				8	0.00933993
	189	458930	643869	1292.93				8	0.00977916
	190	458930	643869	1292.66				8	0.00905057
	191	458931	643869	1292.44				8	0.00859394
	192	458931	643869	1292.2				8	0.00958052
	193	458931	643870	1291.65				8	0.00939906
	194	458932	643870	1291.51				8	0.0109019
	195	458932	643870	1291.41				8	0.00914054
	196	458932	643870	1291.52				8	0.00852435
7	197	458924	643868	1294.99				8	0.00848274
	198	458924	643868	1295.23				8	0.0102767
	199	458924	643868	1295.53				8	0.010047
	200	458923	643868	1295.84				8	0.0092277
	201	458923	643867	1296.27				8	0.0099661
	202	458922	643867	1296.7				8	0.00891487
	203	458922	643867	1296.91				8	0.00890035
	204	458921	643867	1297.29				8	0.00998914
	205	458921	643866	1297.66				8	0.00996433
	206	458920	643866	1297.86				8	0.00899818
	207	458920	643866	1298.16				8	0.00831518
	208	458920	643866	1298.37				8	0.0097329
	209	458920	643865	1298.4				8	0.00791744
	210	458919	643865	1298.78				8	0.00835173
	211	458918	643865	1298.87				8	0.0091738
	212	458918	643865	1299.3				8	0.00796573
	213	458917	643865	1299.55				8	0.00949653
	214	458916	643865	1299.6				8	0.00896869
	215	458916	643865	1299.86				8	0.00865981
	216	458915	643865	1300.03				8	0.00829376
	217	458915	643865	1300.09				8	0.00906418
	218	458914	643865	1300.24				8	0.00964446
	219	458914	643865	1300.42				8	0.0100597
	220	458913	643864	1300.59				8	0.00772861
	221	458913	643864	1300.76				8	0.00948536
	222	458912	643864	1301.02				8	0.00781101
	223	458912	643864	1301.15				8	0.00790575
	224	458911	643864	1301.26				8	0.00787102
	225	458911	643864	1301.38				8	0.00781821
	226	458911	643865	1301.49				8	0.00823048
	227	458910	643865	1301.7				8	0.00799764
	228	458909	643865	1301.75				8	0.00893657
	229	458909	643865	1301.74				8	0.0102292
	230	458909	643865	1301.64				8	0.00968982
	231	458909	643866	1301.46				8	0.00945742
	232	458910	643866	1301.18				8	0.00846189
	233	458910	643867	1300.73				8	0.00893662
	234	458911	643867	1300.59				8	0.00938345
	235	458911	643866	1300.54				8	0.00807769
	236	458912	643866	1300.43				8	0.00854528
	237	458913	643866	1300.17				8	0.00933225
	238	458913	643866	1299.98				8	0.0100265
	239	458914	643866	1299.8				8	0.00943283
	240	458914	643866	1299.62				8	0.00846178
	241	458915	643867	1299.39				8	0.00877339
	242	458916	643867	1299.37				8	0.00856511
	243	458917	643867	1298.97				8	0.00906406
	244	458917	643867	1298.65				8	0.00871841
	245	458918	643868	1298.18				8	0.00823582
	246	458918	643868	1297.55				8	0.00998774
	247	458918	643869	1297.17				8	0.00974754
	248	458919	643869	1296.69				8	0.0087786
	249	458920	643869	1296.17				8	0.00773008
	250	458920	643870	1295.81				8	0.00878352
	251	458921	643870	1295.32				8	0.00834136
	252	458922	643870	1295.22				8	0.00923908
	253	458922	643869	1295.61				8	0.00824906
	254	458923	643869	1295.1				8	0.00889816
	255	458924	643869	1294.94				8	0.00910563
8	259	458903	643867	1303.25				8	0.0085493
	260	458903	643867	1303.61				8	0.00916478
	261	458902	643867	1303.97				8	0.0086074
	262	458901	643867	1304.17				8	0.00884505
	263	458901	643867	1304.27				8	0.00908025
	264	458900	643867	1304.5				8	0.00876178
	265	458900	643866	1304.75				8	0.00850302
	266	458900	643867	1304.88				8	0.00955108
	267	458899	643867	1305				8	0.00888505
	268	458899	643867	1305.15				8	0.00899642
	269	458898	643867	1305.27				8	0.0101809
	270	458897	643867	1305.47				8	0.00884069
	271	458897	643867	1305.66				8	0.00940811
	272	458896	643867	1305.84				8	0.00911159
	273	458895	643867	1305.91				8	0.00958527
	274	458895	643866	1305.96				8	0.00979276
	275	458895	643866	1305.94				8	0.00980316
	276	458895	643866	1305.93				8	0.0100965
	277	458894	643865	1305.98				8	0.0103786
	278	458894	643865	1306.1				8	0.00950829
	279	458893	643865	1306.2				8	0.0090604
	280	458893	643865	1306.33				8	0.00888496
	281	458892	643866	1306.37				8	0.00897158
	282	458892	643866	1306.42				8	0.00834644
	283	458891	643866	1306.51				8	0.00957262
	284	458891	643866	1306.55				8	0.0100371
	285	458890	643867	1306.49				8	0.00925899
	286	458890	643867	1306.37				8	0.0100275
	287	458891	643868	1306.22				8	0.0103295
	288	458891	643868	1306.11				8	0.00998171
	289	458891	643868	1305.93				8	0.0105735
	290	458892	643868	1305.83				8	0.00980909
	291	458892	643868	1305.75				8	0.00958778
	292	458893	643868	1305.75				8	0.00948456
	293	458893	643868	1305.47				8	0.0100691
	294	458894	643869	1305.4				8	0.0102596
	295	458894	643869	1305.19				8	0.00974725
	296	458895	643869	1305.09				8	0.00870586
	297	458895	643869	1304.97				8	0.00822931
	298	458895	643870	1304.62				8	0.0101483
	299	458896	643870	1304.31				8	0.00910909
	300	458896	643870	1304.26				8	0.00997374
	301	458897	643870	1304.23				8	0.0101052
	302	458897	643870	1304.25				8	0.00954141
	303	458898	643870	1304.14				8	0.00968691
	304	458899	643870	1303.75				8	0.00972072
	305	458899	643869	1303.98				8	0.00907713
	306	458899	643869	1304.09				8	0.010115
	307	458900	643869	1304.09				8	0.00971647
	308	458900	643869	1303.79				8	0.00851947
	309	458900	643869	1303.57				8	0.00890527
	310	458901	643869	1303.3				8	0.0108162
	311	458901	643869	1303.09				8	0.00929321
	312	458902	643869	1302.95				8	0.00950876
	313	458902	643869	1303.15				8	0.00993399
	314	458903	643868	1303.26				8	0.0117932
	315	458903	643867	1303.31				8	0.010746
9	316	458879	643869	1308.19				8	0.00920641
	317	458879	643869	1308.37				8	0.00928267
	318	458878	643869	1308.46				8	0.00960182
	319	458878	643869	1308.56				8	0.00872622
	320	458877	643869	1308.76				8	0.00963021
	321	458877	643869	1308.81				8	0.0104281
	322	458876	643869	1308.91				8	0.00925048
	323	458875	643869	1308.96				8	0.00942745
	324	458875	643869	1308.98				8	0.0091641
	325	458875	643869	1309.06				8	0.00868399
	326	458874	643869	1309.04				8	0.00939913
	327	458874	643870	1309.07				8	0.00978657
	328	458874	643870	1309.08				8	0.0092132
	329	458874	643870	1308.97				8	0.00944964
	330	458875	643870	1308.89				8	0.00930209
	331	458875	643870	1308.84				8	0.0091439
	332	458876	643870	1308.76				8	0.0102257
	333	458876	643870	1308.77				8	0.00962573
	334	458876	643870	1308.62				8	0.00900908
	335	458877	643870	1308.48				8	0.00941355
	336	458878	643870	1308.35				8	0.00867367
	337	458878	643870	1308.27				8	0.00919675
	338	458879	643870	1308.08				8	0.00927982
	339	458879	643870	1307.96				8	0.00935001
	340	458880	643870	1307.94				8	0.0102834
10	341	458872	643869	1309.12				8	0.00970822
	342	458871	643870	1309.18				8	0.00918608
	343	458870	643870	1309.18				8	0.00912258
	344	458870	643870	1309.15				8	0.00884608
	345	458869	643870	1309.09				8	0.00900597
	346	458869	643870	1309.01				8	0.00932693
	347	458868	643870	1308.96				8	0.00849077
	348	458867	643870	1308.94				8	0.00885941
	349	458867	643870	1308.91				8	0.00840602
	350	458866	643870	1308.95				8	0.00863737
	351	458866	643870	1308.96				8	0.00901086
	352	458865	643870	1308.98				8	0.00849123
	353	458865	643871	1309.08				8	0.00892591
	354	458865	643871	1309.21				8	0.00844834
	355	458865	643871	1309.25				8	0.0102987
	356	458864	643872	1309.36				8	0.00948564
	357	458864	643872	1309.37				8	0.00854526
	358	458863	643872	1309.44				8	0.00808315
	359	458863	643873	1309.54				8	0.00994719
	360	458862	643873	1309.62				8	0.00881744
	361	458862	643873	1309.7				8	0.00863184
	362	458861	643873	1309.66				8	0.00982471
	363	458861	643873	1309.7				8	0.00860003
	364	458860	643873	1309.7				8	0.00803372
	365	458860	643874	1309.72				8	0.00840786
	366	458859	643874	1309.7				8	0.00962982
	367	458859	643874	1309.64				8	0.00878165
	368	458859	643873	1309.52				8	0.00820975
	369	458858	643874	1309.4				8	0.00872144
	370	458858	643874	1309.33				8	0.00833064
	371	458857	643874	1309.1				8	0.0088193
	372	458857	643874	1309.1				8	0.00812874
	373	458856	643874	1309.01				8	0.0083336
	374	458856	643874	1308.87				8	0.00844117
	375	458855	643874	1308.74				8	0.00876155
	376	458855	643874	1308.58				8	0.00894396
	377	458854	643874	1308.47				8	0.00918555
	378	458853	643874	1308.4				8	0.00845491
	379	458853	643875	1308.35				8	0.00863897
	380	458852	643875	1308.2				8	0.00851698
	381	458851	643875	1308.1				8	0.0091164
	382	458851	643875	1307.86				8	0.00902488
	383	458850	643875	1307.84				8	0.0114903
	384	458849	643876	1307.85				8	0.00872496
	385	458850	643876	1308.02				8	0.0087208
	386	458851	643876	1308.1				8	0.00854702
	387	458851	643876	1308.21				8	0.00773777
	388	458852	643876	1308.34				8	0.00882422
	389	458852	643876	1308.41				8	0.0083656
	390	458853	643876	1308.5				8	0.00834501
	391	458853	643876	1308.56				8	0.00794913
	392	458854	643876	1308.51				8	0.00970632
	393	458855	643876	1308.61				8	0.008393
	394	458855	643876	1308.7				8	0.00777833
	395	458856	643876	1308.71				8	0.00840461
	396	458856	643876	1308.7				8	0.00926247
	397	458857	643876	1308.74				8	0.00865218
	398	458857	643876	1308.71				8	0.00878181
	399	458858	643876	1308.67				8	0.00972397
	400	458858	643876	1308.8				8	0.00799031
	401	458859	643876	1308.82				8	0.00890935
	402	458859	643876	1308.84				8	0.00967931
	403	458860	643876	1308.85				8	0.00856076
	404	458860	643876	1308.86				8	0.00832546
	405	458861	643876	1308.87				8	0.00845919
	406	458861	643875	1308.89				8	0.00857549
	407	458862	643875	1308.94				8	0.00864899
	408	458862	643875	1308.99				8	0.00881865
	409	458862	643875	1309.09				8	0.00766064
	410	458863	643874	1309.23				8	0.0084867
	411	458864	643874	1309.34				8	0.00870707
	412	458864	643873	1309.34				8	0.00943202
	413	458864	643873	1309.37				8	0.00803802
	414	458865	643873	1309.33				8	0.00817055
	415	458865	643872	1309.34				8	0.00933746
	416	458866	643872	1309.41				8	0.0098534
	417	458866	643872	1309.44				8	0.00828197
	418	458867	643871	1309.56				8	0.0092039
	419	458867	643871	1309.53				8	0.00953147
	420	458868	643871	1309.5				8	0.00920327
	421	458868	643871	1309.47				8	0.00937606
	422	458869	643871	1309.4				8	0.00836001
	423	458869	643871	1309.36				8	0.00858777
	424	458870	643871	1309.28				8	0.00903554
	425	458870	643871	1309.29				8	0.00976416
	426	458871	643870	1309.23				8	0.00923727
	341	458872	643869	1309.12				8	0.00970822
11	527	458840	643882	1307.35				8	0.00944487
	428	458839	643882	1307.42				8	0.00951966
	429	458838	643883	1307.53				8	0.0106213
	430	458838	643883	1307.52				8	0.0122263
	431	458837	643883	1307.4				8	0.0106423
	432	458837	643883	1307.34				8	0.0101473
	433	458836	643883	1307.31				8	0.010102
	434	458836	643883	1307.29				8	0.0103986
	435	458835	643883	1307.15				8	0.00905314
	436	458834	643883	1307.13				8	0.0115765
	437	458834	643884	1307.08				8	0.0102637
	438	458833	643883	1306.91				8	0.00899691
	439	458833	643884	1306.89				8	0.00861849
	440	458832	643884	1306.95				8	0.00955671
	441	458832	643883	1306.88				8	0.00890989
	442	458831	643883	1306.73				8	0.00938405
	443	458831	643883	1306.61				8	0.0097597
	444	458830	643883	1306.56				8	0.00910353
	445	458830	643883	1306.51				8	0.00996178
	446	458829	643883	1306.5				8	0.00870607
	447	458828	643883	1306.46				8	0.0101226
	448	458828	643883	1306.48				8	0.00853322
	449	458827	643884	1306.25				8	0.0096531
	450	458826	643884	1306.22				8	0.00979681
	451	458826	643884	1306.22				8	0.00844681
	452	458825	643884	1306.03				8	0.00901896
	453	458825	643884	1306.02				8	0.0108499
	454	458824	643885	1305.96				8	0.00995707
	455	458824	643885	1305.81				8	0.00951836
	456	458823	643885	1305.8				8	0.00834189
	457	458823	643885	1305.82				8	0.00879286
	458	458822	643884	1305.6				8	0.00913401
	459	458822	643885	1305.51				8	0.00842544
	460	458821	643885	1305.51				8	0.00957801
	461	458821	643885	1305.5				8	0.00900582
	462	458820	643885	1305.51				8	0.00882974
	463	458820	643885	1305.46				8	0.0100085
	464	458819	643886	1305.42				8	0.00931548
	465	458819	643886	1305.38				8	0.00953613
	466	458818	643886	1305.3				8	0.010014
	467	458818	643886	1305.27				8	0.0101912
	468	458817	643885	1305.03				8	0.00968011
	469	458816	643885	1304.9				8	0.00899112
	470	458815	643886	1304.91				8	0.0100306
	471	458814	643886	1304.63				8	0.0104664
	472	458813	643886	1304.37				8	0.00996754
	473	458812	643886	1304.34				8	0.0104958
	553	458809	643887	1304.01				8	0.0103217
	552	458809	643887	1303.94				8	0.00933008
	551	458808	643888	1303.69				8	0.0113353
	550	458807	643888	1303.44				8	0.00954912
	549	458806	643889	1303.3				8	0.0115986
	548	458805	643889	1302.86				8	0.0106218
	493	458806	643889	1302.86				8	0.0100342
	494	458808	643889	1303.32				8	0.010093
	495	458809	643889	1303.61				8	0.0100763
	496	458811	643889	1304				8	0.0103558
	497	458812	643888	1304.37				8	0.00886171
	498	458813	643888	1304.69				8	0.0106993
	499	458815	643887	1305.11				8	0.0110322
	500	458816	643887	1305.2				8	0.010459
	501	458817	643887	1305.35				8	0.00994587
	502	458818	643887	1305.47				8	0.0102349
	503	458820	643887	1305.71				8	0.0109398
	504	458821	643887	1305.91				8	0.0107543
	505	458822	643886	1306.04				8	0.00991411
	506	458823	643886	1306.19				8	0.00968655
	507	458824	643886	1306.41				8	0.00944767
	508	458825	643885	1306.64				8	0.00887981
	509	458826	643885	1306.89				8	0.0102773
	510	458827	643885	1307.05				8	0.0125387
	511	458828	643885	1307.03				8	0.0110232
	512	458829	643885	1307.05				8	0.010169
	513	458830	643884	1307.36				8	0.00987145
	514	458830	643884	1307.38				8	0.0105654
	515	458831	643884	1307.44				8	0.0107137
	516	458831	643885	1307.26				8	0.010103
	517	458832	643885	1307.16				8	0.0103169
	518	458833	643885	1307.24				8	0.0107
	519	458834	643884	1307.45				8	0.0105548
	520	458835	643884	1307.52				8	0.0100795
	521	458835	643884	1307.55				8	0.00951283
	522	458836	643884	1307.48				8	0.00953236
	523	458837	643884	1307.48				8	0.00985572
	524	458838	643884	1307.52				8	0.00911889
	525	458839	643884	1307.48				8	0.011087
	526	458840	643883	1307.36				8	0.0106592
	527	458840	643882	1307.35				8	0.00944487
12	474	458810	643886	1303.89				8	0.00959061
	475	458810	643886	1303.67				8	0.0101021
	476	458808	643886	1303.45				8	0.0106655
	477	458807	643886	1303.16				8	0.0114437
	478	458806	643886	1303.02				8	0.0113543
	479	458805	643886	1302.85				8	0.0113692
	480	458804	643886	1302.72				8	0.0110181
	481	458803	643886	1302.49				8	0.0098623
	482	458802	643886	1302.07				8	0.00960671
	483	458801	643886	1301.5				8	0.0114513
	484	458800	643887	1301.39				8	0.0115881
	485	458799	643887	1301.11				8	0.0108703
	486	458798	643888	1300.87				8	0.0114254
	487	458798	643888	1300.96				8	0.0100122
	488	458799	643889	1301.47				8	0.00979579
	489	458801	643888	1301.87				8	0.00969687
	490	458802	643888	1302.44				8	0.00930478
	491	458803	643888	1302.96				8	0.0107115
	560	458804	643887	1303.15				8	0.010651
	559	458805	643887	1303.34				8	0.0101527
	558	458806	643887	1303.52				8	0.0106641
	557	458807	643887	1303.67				8	0.0120911
	556	458808	643886	1303.81				8	0.010341
	555	458809	643886	1303.85				8	0.0106531
	474	458810	643886	1303.89				8	0.00959061
13	528	458796	643888	1300.5				8	0.0102645
	529	458796	643887	1300.3				8	0.0122011
	530	458794	643887	1300.13				8	0.0109896
	531	458793	643888	1299.7				8	0.0122699
	532	458792	643888	1299.51				8	0.0114004
	533	458791	643888	1299.21				8	0.0107981
	534	458790	643888	1299.05				8	0.0113059
	535	458789	643888	1298.7				8	0.0116024
	536	458788	643888	1298.31				8	0.0116189
	537	458787	643888	1298.16				8	0.012832
	538	458785	643888	1297.94				8	0.0112536
	539	458784	643889	1297.8				8	0.0126829
	540	458786	643889	1298.09				8	0.0121608
	541	458789	643889	1298.85				8	0.0147342
	542	458790	643890	1298.89				8	0.0101141
	543	458791	643890	1299.08				8	0.0132308
	544	458792	643890	1299.33				8	0.0126752
	545	458793	643889	1299.94				8	0.0137662
	546	458795	643889	1300.23				8	0.0122244
	547	458795	643888	1300.5				8	0.0107644
14	561	458797	643905	1302.29				8	0.0110374
	562	458796	643905	1302.35				8	0.0111741
	563	458795	643905	1302.39				8	0.00983319
	564	458794	643904	1302.42				8	0.0105269
	565	458793	643904	1302.71				8	0.0104065
	566	458792	643904	1302.7				8	0.0104115
	567	458791	643904	1302.81				8	0.0114438
	568	458790	643904	1302.81				8	0.00996144
	569	458789	643904	1302.75				8	0.010034
	570	458788	643904	1302.63				8	0.0117254
	571	458786	643904	1302.46				8	0.00973054
	572	458785	643904	1302.25				8	0.00995691
	573	458784	643904	1302.13				8	0.00995666
	574	458783	643905	1302.02				8	0.0104288
	575	458782	643904	1301.76				8	0.00996138
	576	458781	643904	1301.63				8	0.0095325
	577	458780	643904	1301.6				8	0.0102553
	578	458779	643904	1301.55				8	0.00982855
	579	458778	643904	1301.24				8	0.00916791
	580	458777	643905	1301.2				8	0.00898868
	581	458776	643905	1300.97				8	0.0113912
	582	458774	643905	1300.54				8	0.0102829
	583	458773	643905	1300.47				8	0.00954081
	584	458772	643906	1300.3				8	0.00930011
	585	458771	643906	1300.18				8	0.00838904
	586	458770	643906	1300				8	0.011897
	587	458769	643906	1299.94				8	0.00943224
	588	458768	643906	1299.71				8	0.00946124
	589	458767	643906	1299.66				8	0.0101045
	590	458766	643906	1299.67				8	0.00947006
	591	458766	643906	1299.59				8	0.0108877
	592	458766	643905	1299.29				8	0.00852137
	593	458765	643905	1299.2				8	0.00950104
	594	458764	643904	1299.07				8	0.00863087
	595	458763	643904	1298.9				8	0.00994587
	596	458762	643905	1298.77				8	0.00880963
	597	458761	643905	1298.62				8	0.00899262
	598	458760	643905	1298.37				8	0.00942004
	599	458759	643905	1298.35				8	0.0101475
	600	458760	643906	1298.63				8	0.00994417
	601	458761	643906	1298.86				8	0.00884191
	602	458761	643906	1299.04				8	0.0086299
	603	458762	643907	1299.16				8	0.0103981
	604	458762	643908	1299.08				8	0.00946657
	605	458761	643908	1298.94				8	0.00836689
	606	458762	643909	1298.89				8	0.00867598
	607	458762	643908	1299.14				8	0.00902537
	608	458764	643908	1299.18				8	0.00946547
	609	458765	643908	1299.28				8	0.0084667
	610	458766	643908	1299.55				8	0.00835045
	611	458767	643907	1299.76				8	0.00878932
	612	458769	643907	1299.99				8	0.00857294
	613	458770	643907	1300.02				8	0.00908921
	614	458771	643907	1300.08				8	0.00973779
	615	458771	643907	1300.12				8	0.00913229
	616	458772	643907	1300.15				8	0.00819103
	617	458773	643907	1300.43				8	0.0093237
	618	458774	643906	1300.65				8	0.00871287
	619	458775	643906	1300.88				8	0.00910861
	620	458776	643906	1301.06				8	0.00860553
	621	458777	643906	1301.34				8	0.00905873
	622	458778	643905	1301.48				8	0.00918895
	623	458779	643905	1301.58				8	0.00908578
	624	458780	643905	1301.68				8	0.00951858
	625	458781	643905	1301.66				8	0.00878757
	626	458782	643905	1301.91				8	0.00931048
	627	458783	643906	1302.01				8	0.00857428
	628	458784	643905	1302.25				8	0.00919617
	629	458785	643905	1302.33				8	0.0087135
	630	458786	643905	1302.49				8	0.00897343
	631	458787	643905	1302.57				8	0.010453
	632	458788	643905	1302.67				8	0.0103754
	633	458789	643905	1302.67				8	0.0111283
	634	458790	643905	1302.65				8	0.00890158
	635	458791	643905	1302.58				8	0.00954051
	636	458792	643905	1302.54				8	0.00904009
	637	458793	643905	1302.54				8	0.00960085
	638	458794	643905	1302.49				8	0.0094851
	639	458794	643905	1302.38				8	0.009906
	640	458795	643905	1302.34				8	0.0105493
	641	458796	643905	1302.33				8	0.00878956
15	666	458734	643922	1296.41				8	0.0113019
	667	458734	643922	1296.63				8	0.0115068
	668	458733	643922	1296.65				8	0.0113128
	669	458732	643922	1296.67				8	0.0109014
	670	458732	643922	1296.69				8	0.0112432
	671	458731	643922	1296.69				8	0.0113377
	672	458731	643921	1296.68				8	0.011437
	673	458730	643922	1296.63				8	0.0127549
	674	458730	643922	1296.54				8	0.0131211
	675	458730	643922	1296.43				8	0.0112298
	676	458730	643922	1296.34				8	0.0109495
	677	458731	643922	1296.31				8	0.0103073
	678	458731	643922	1296.36				8	0.0104148
	679	458732	643922	1296.39				8	0.0124734
	680	458732	643922	1296.33				8	0.0120965
	681	458733	643922	1296.3				8	0.0105738
	682	458734	643922	1296.27				8	0.0113264
	683	458734	643922	1296.35				8	0.0115884
	684	458734	643922	1296.43				8	0.0104332

## Sheet: Sheet9
Injectite #9
Segment #	GPS Point #	Northings (m)	Eastings (m)	Elevation (m)				Code	Precision (m)
1	685	458676	643924	1287.42				9	0.0126734
	686	458676	643925	1288.22				9	0.0105289
	687	458677	643926	1288.98				9	0.0107573
	688	458679	643927	1289.61				9	0.0108108
	689	458679	643928	1290.16				9	0.0124399
	690	458681	643930	1290.92				9	0.0118015
	691	458682	643931	1291.69				9	0.011671
	692	458683	643934	1292.53				9	0.0104371
	693	458684	643935	1293.11				9	0.0140418
	694	458685	643937	1293.72				9	0.0110154
	695	458686	643940	1294.52				9	0.0114097
	696	458686	643942	1294.8				9	0.0119229
	697	458687	643943	1295.46				9	0.0125971
	698	458688	643945	1296.07				9	0.0102926
	699	458689	643945	1296.08				9	0.0145272
	700	458688	643943	1295.63				9	0.0105763
	701	458687	643940	1294.95				9	0.0123584
	702	458686	643938	1293.98				9	0.0129152
	703	458685	643936	1293.5				9	0.0123107
	704	458684	643935	1293.15				9	0.0139854
	705	458684	643934	1292.69				9	0.0127097
	706	458683	643932	1292.08				9	0.0146056
	707	458682	643930	1291.33				9	0.0112726
	708	458681	643929	1290.63				9	0.0106061
	709	458680	643927	1289.83				9	0.0123092
	710	458678	643926	1289.06				9	0.0120752
	711	458677	643925	1288.54				9	0.0120298
	712	458677	643924	1287.99				9	0.0123772
	713	458676	643924	1287.58				9	0.0132078
2	714	458683	643927	1289.77				9	0.00947225
	715	458684	643928	1290.69				9	0.0104487
	716	458685	643929	1291.86				9	0.0102889
	717	458686	643931	1292.45				9	0.0111749
	718	458687	643932	1293.01				9	0.0101424
	719	458687	643934	1293.52				9	0.0122047
	720	458688	643936	1293.8				9	0.0118787
	721	458689	643936	1293.98				9	0.0125459
	722	458689	643935	1293.82				9	0.0133113
	723	458689	643934	1293.41				9	0.0106325
	724	458688	643931	1292.59				9	0.0101333
	725	458688	643929	1291.83				9	0.0123741
	726	458687	643928	1291.27				9	0.013252
	727	458685	643927	1290.54				9	0.0128814
	728	458684	643927	1290.15				9	0.0111408
	729	458683	643926	1289.71				9	0.0119561
3	730	458699	643952	1299.01				9	0.0114055
	731	458699	643954	1299.65				9	0.013868
	732	458699	643956	1300.19				9	0.012891
	733	458700	643959	1301.12				9	0.0112198
	734	458701	643961	1301.69				9	0.0107899
	735	458702	643962	1302.17				9	0.0117702
	736	458703	643963	1302.82				9	0.0115071
	737	458705	643965	1303.59				9	0.0112097
	738	458706	643967	1304.26				9	0.0112269
	739	458707	643970	1304.58				9	0.0110405
	740	458709	643973	1305.38				9	0.0106518
	741	458709	643970	1305.26				9	0.0108184
	742	458708	643968	1304.86				9	0.0105055
	743	458707	643966	1304.29				9	0.0105852
	744	458707	643963	1303.24				9	0.0105724
	745	458706	643961	1302.48				9	0.0101833
	746	458705	643960	1301.94				9	0.0128
	747	458704	643959	1301.75				9	0.0102896
	748	458703	643958	1301.39				9	0.00945615
	749	458702	643956	1300.6				9	0.00975707
	750	458702	643955	1300.08				9	0.0130899
	751	458701	643954	1299.67				9	0.0112758
	752	458700	643953	1299.39				9	0.0113107
	753	458699	643952	1298.96				9	0.0119123
4	754	458708	643960	1301.82				9	0.0115998
	755	458708	643962	1302.97				9	0.010453
	756	458708	643964	1303.85				9	0.0102403
	757	458709	643966	1304.33				9	0.0101085
	758	458710	643968	1304.86				9	0.0108509
	759	458712	643971	1305.73				9	0.0101134
	760	458713	643974	1306.25				9	0.0107605
	761	458714	643977	1306.61				9	0.00926241
	762	458716	643980	1307.49				9	0.0111534
	763	458718	643982	1307.96				9	0.0105835
	764	458720	643983	1307.89				9	0.0118841
	765	458721	643984	1307.79				9	0.0101314
	766	458721	643982	1307.81				9	0.0114634
	767	458719	643981	1307.62				9	0.0103219
	768	458718	643979	1307.12				9	0.0107923
	769	458717	643977	1306.53				9	0.0111389
	770	458716	643974	1305.95				9	0.0118793
	771	458715	643972	1305.94				9	0.00995694
	772	458713	643970	1305.12				9	0.0114582
	773	458712	643968	1304.29				9	0.0126528
	774	458710	643965	1303.61				9	0.0118323
	775	458709	643962	1302.43				9	0.0136175
	776	458709	643961	1301.94				9	0.0111287
	777	458708	643960	1301.68				9	0.0106596
5	778	458722	643986	1307.8				9	0.011157
	779	458723	643988	1307.67				9	0.00988513
	780	458724	643991	1307.4				9	0.0115092
	781	458724	643992	1307.05				9	0.0125591
	782	458726	643994	1306.19				9	0.0119497
	783	458726	643994	1305.82				9	0.0119274
	784	458727	643993	1305.75				9	0.0115139
	785	458725	643990	1307.23				9	0.0109609
	786	458724	643987	1307.26				9	0.0101661
	787	458723	643986	1307.38				9	0.0120837
	788	458722	643986	1307.81				9	0.0106594
6	789	458730	643999	1304.17				9	0.0107662
	790	458730	644000	1303.98				9	0.0108145
	791	458731	644001	1303.66				9	0.0107688
	792	458732	644002	1303.13				9	0.0109991
	793	458733	644003	1302.7				9	0.0120624
	794	458734	644004	1302.3				9	0.0122083
	795	458734	644003	1302.33				9	0.0101063
	796	458734	644002	1302.68				9	0.00955138
	797	458734	644001	1302.81				9	0.0110072
	798	458733	644000	1303.11				9	0.0105181
	799	458732	643999	1303.55				9	0.0111575
	800	458731	643999	1303.8				9	0.0103033
	801	458730	643998	1304.14				9	0.0109361
7	802	458735	644008	1301.22				9	0.0125983
	803	458736	644011	1300.42				9	0.0116421
	804	458738	644012	1299.76				9	0.0103973
	805	458739	644013	1299.15				9	0.0104239
	806	458740	644013	1298.57				9	0.0129024
	807	458740	644011	1298.83				9	0.0102111
	808	458739	644010	1299.74				9	0.0108117
	809	458737	644009	1300.49				9	0.0112684
	810	458736	644008	1301.11				9	0.0106559
8	811	458739	644016	1298.01				9	0.0105096
	812	458740	644017	1297.61				9	0.0109292
	813	458741	644019	1296.68				9	0.0102232
	814	458743	644022	1295.83				9	0.0116692
	815	458743	644023	1295.11				9	0.0109616
	816	458745	644027	1293.44				9	0.012693
	817	458747	644029	1292.53				9	0.0119763
	818	458748	644031	1291.34				9	0.0122211
	819	458749	644033	1290.04				9	0.0102696
	820	458751	644032	1289.44				9	0.0107288
	821	458750	644031	1290.11				9	0.00997385
	822	458749	644029	1291.02				9	0.0100692
	823	458747	644026	1292.59				9	0.0109016
	824	458745	644024	1293.63				9	0.0104693
	825	458744	644022	1294.7				9	0.00989861
	826	458743	644020	1295.88				9	0.0096309
	827	458742	644019	1296.49				9	0.0104167
	828	458741	644017	1297.33				9	0.0104044
	829	458740	644016	1297.67				9	0.0109772
	830	458740	644016	1298.05				9	0.0108627
	831	458739	644016	1298.06				9	0.00978293
9	832	458762	644051	1281.88				9	0.0104941
	833	458763	644053	1281.34				9	0.0112532
	834	458764	644055	1280.09				9	0.0111282
	835	458766	644057	1279.3				9	0.0104047
	836	458767	644058	1278.42				9	0.0097197
	837	458767	644059	1277.9				9	0.0100726
	838	458769	644061	1277.21				9	0.0110806
	839	458771	644063	1276.78				9	0.0109865
	840	458772	644065	1276.13				9	0.010374
	841	458774	644067	1275.33				9	0.0128479
	842	458775	644069	1274.69				9	0.0115386
	843	458776	644070	1274.12				9	0.0110821
	844	458777	644071	1273.86				9	0.00941834
	845	458778	644071	1273.59				9	0.0105531
	846	458777	644069	1274.31				9	0.0110315
	847	458775	644067	1274.95				9	0.00942299
	848	458774	644065	1275.76				9	0.00944262
	849	458772	644063	1276.64				9	0.00997427
	850	458768	644059	1277.79				9	0.0102759
	851	458767	644056	1278.82				9	0.00986686
	852	458766	644055	1279.73				9	0.0095358
	853	458764	644053	1280.9				9	0.0106862
	854	458762	644051	1281.7				9	0.0103677
	855	458762	644051	1281.85				9	0.00858339
10	857	458768	644083	1273.15				9	0.008967
	858	458769	644084	1272.8				9	0.00951975
	859	458770	644085	1272.5				9	0.0102413
	860	458771	644086	1272.47				9	0.0092534
	861	458771	644086	1272.35				9	0.0098063
	862	458772	644086	1272.38				9	0.00864376
	863	458772	644087	1272.26				9	0.00994227
	864	458772	644087	1272.22				9	0.00927645
	865	458772	644088	1272.07				9	0.0094104
	866	458773	644088	1271.98				9	0.0096686
	867	458773	644088	1271.93				9	0.00988792
	868	458773	644087	1272.07				9	0.0102902
	869	458773	644087	1272.21				9	0.0109613
	870	458773	644086	1272.25				9	0.0107313
	871	458773	644086	1272.29				9	0.0118456
	872	458771	644086	1272.41				9	0.0100182
	873	458771	644085	1272.49				9	0.0103325
	874	458770	644084	1272.66				9	0.0108416
	875	458769	644083	1272.99				9	0.00999604
	876	458769	644082	1273.22				9	0.00836267
	877	458768	644082	1273.47				9	0.0103405
	878	458768	644082	1273.47				9	0.00978489
	857	458768	644083	1273.15				9	0.008967

## Sheet: Sheet10
Injectite #10
Segment #	GPS Point #	Northings (m)	Eastings (m)	Elevation (m)				Code	Precision (m)
1	68	458326	644346	1288.61				10	0.0122531
	69	458326	644346	1288.56				10	0.0110926
	70	458326	644346	1288.54				10	0.00981928
	71	458326	644346	1288.5				10	0.0118476
	72	458326	644347	1288.47				10	0.0122689
	73	458326	644347	1288.46				10	0.010993
	74	458326	644347	1288.45				10	0.0122605
	75	458327	644347	1288.52				10	0.0131832
	76	458327	644347	1288.53				10	0.0102895
	77	458327	644347	1288.46				10	0.0124426
	78	458327	644348	1288.44				10	0.0113825
	79	458327	644348	1288.39				10	0.0105734
	80	458327	644348	1288.43				10	0.0113581
	81	458327	644348	1288.51				10	0.0122787
	82	458328	644348	1288.49				10	0.0108914
	83	458328	644348	1288.46				10	0.0115805
	84	458328	644349	1288.45				10	0.0110802
	85	458328	644349	1288.44				10	0.0112987
	86	458328	644349	1288.37				10	0.0107115
	87	458328	644349	1288.19				10	0.0111278
	88	458328	644349	1288.23				10	0.0100363
	89	458328	644349	1288.12				10	0.0112714
	90	458329	644350	1288.04				10	0.0108504
	91	458329	644350	1287.97				10	0.0109071
	92	458329	644350	1287.9				10	0.011252
	93	458329	644350	1287.88				10	0.00974895
	94	458329	644350	1287.96				10	0.0161111
	95	458329	644351	1287.88				10	0.0111611
	96	458330	644351	1287.67				10	0.012606
	97	458330	644351	1287.65				10	0.0113653
	98	458330	644351	1287.52				10	0.0118708
	99	458330	644352	1287.49				10	0.0108139
	100	458331	644352	1287.32				10	0.0101467
	101	458331	644352	1287.22				10	0.0104903
	102	458331	644352	1287.32				10	0.0108604
	103	458331	644353	1287.24				10	0.0110296
	104	458331	644353	1287.01				10	0.0111482
	105	458331	644353	1286.98				10	0.0110447
	106	458332	644353	1286.91				10	0.0106226
	107	458332	644353	1286.83				10	0.0122519
	108	458332	644353	1286.83				10	0.010775
	109	458332	644353	1286.71				10	0.0112768
	110	458332	644354	1286.58				10	0.0106
	111	458332	644354	1286.46				10	0.0106208
	112	458332	644354	1286.44				10	0.010953
	113	458333	644354	1286.4				10	0.0124104
	114	458333	644354	1286.26				10	0.0110226
	115	458333	644355	1286.13				10	0.011109
	116	458333	644355	1286.05				10	0.0118947
	117	458333	644355	1285.9				10	0.0115077
	118	458334	644355	1285.8				10	0.0107845
	119	458334	644355	1285.82				10	0.010321
	120	458334	644355	1285.75				10	0.0104701
	121	458334	644356	1285.55				10	0.0101746
	122	458334	644356	1285.31				10	0.0107503
	123	458335	644356	1285.16				10	0.0100762
	124	458335	644357	1285.08				10	0.0108082
	125	458335	644357	1285.11				10	0.0109127
	126	458335	644357	1285.02				10	0.0103654
	127	458335	644357	1284.92				10	0.0105576
	128	458335	644357	1284.89				10	0.0107699
	129	458336	644357	1284.81				10	0.0114551
	130	458336	644358	1284.72				10	0.0111161
	131	458336	644358	1284.58				10	0.0116278
	132	458336	644358	1284.46				10	0.0100982
	133	458336	644358	1284.4				10	0.0119846
	134	458337	644359	1284.04				10	0.0124049
	135	458337	644359	1283.9				10	0.0105349
	136	458338	644360	1283.69				10	0.0146074
	137	458338	644359	1283.84				10	0.011809
	138	458337	644359	1284.19				10	0.0117225
	139	458336	644358	1284.44				10	0.0116593
	140	458336	644358	1284.56				10	0.0126549
	141	458336	644357	1284.84				10	0.0121423
	142	458336	644357	1284.95				10	0.0118014
	143	458335	644357	1285.1				10	0.0117306
	144	458335	644356	1285.14				10	0.0125866
	145	458335	644356	1285.24				10	0.0099896
	146	458335	644356	1285.37				10	0.0101782
	147	458335	644355	1285.49				10	0.0103295
	148	458334	644355	1285.64				10	0.00923824
	149	458334	644355	1285.83				10	0.0110766
	150	458334	644354	1285.97				10	0.00980494
	151	458333	644354	1286.22				10	0.00987681
	152	458333	644354	1286.37				10	0.0105868
	153	458333	644354	1286.43				10	0.0111684
	154	458333	644353	1286.41				10	0.0103253
	155	458333	644353	1286.53				10	0.0101197
	156	458332	644353	1286.76				10	0.0111285
	157	458332	644353	1286.77				10	0.010164
	158	458332	644353	1286.81				10	0.0117879
	159	458332	644352	1286.84				10	0.0104354
	160	458332	644352	1286.92				10	0.0100157
	161	458331	644352	1287.03				10	0.0103376
	162	458331	644352	1287.15				10	0.0100167
	163	458331	644351	1287.28				10	0.0095745
	164	458331	644351	1287.48				10	0.00936795
	165	458330	644351	1287.56				10	0.00999831
	166	458330	644351	1287.6				10	0.0102392
	167	458330	644350	1287.67				10	0.0103817
	168	458330	644350	1287.53				10	0.00962722
	169	458330	644350	1287.58				10	0.0101103
	170	458329	644350	1287.69				10	0.0109113
	171	458329	644349	1287.62				10	0.0107115
	172	458329	644349	1287.68				10	0.010625
	173	458329	644349	1287.7				10	0.0102879
	174	458329	644349	1287.68				10	0.00817678
	175	458329	644348	1287.71				10	0.00975521
	176	458328	644349	1287.72				10	0.0114539
	177	458328	644348	1287.77				10	0.00922381
	178	458328	644348	1287.87				10	0.00949226
	179	458328	644348	1287.89				10	0.00921952
	180	458328	644347	1287.88				10	0.0107111
	181	458327	644347	1287.88				10	0.0087511
	182	458327	644347	1287.91				10	0.00888991
	183	458327	644347	1287.96				10	0.0095273
	184	458327	644346	1288.04				10	0.0108458
	185	458327	644346	1288.13				10	0.00981695
	186	458327	644346	1288.13				10	0.00963495
	187	458326	644346	1288.15				10	0.0103815
	188	458326	644346	1288.34				10	0.00921504
	189	458326	644345	1288.52				10	0.0107525
	190	458326	644345	1288.68				10	0.0106647
	191	458326	644345	1288.8				10	0.00974158
	192	458325	644346	1289.04				10	0.00960587
	193	458326	644346	1288.61				10	0.009904
2	194	458320	644338	1289.23				10	0.0107304
	195	458320	644338	1289.44				10	0.0109137
	196	458320	644337	1289.72				10	0.0112809
	197	458319	644336	1290				10	0.0109577
	198	458319	644336	1290.34				10	0.0114586
	199	458318	644336	1290.49				10	0.0113515
	200	458318	644336	1290.6				10	0.0135588
	201	458318	644336	1290.44				10	0.0134515
	202	458318	644336	1290.15				10	0.010919
	203	458319	644337	1289.95				10	0.0105389
	204	458319	644337	1289.88				10	0.0119309
	205	458320	644338	1289.55				10	0.0116797
	206	458320	644338	1289.33				10	0.0133254
	207	458320	644338	1289.35				10	0.0106638

[truncated: 26 more sheets: Sheet11, Sheet12, Sheet13, Sheet14, Sheet15, Sheet16, Sheet17, Sheet18, Sheet19, Sheet20, Sheet21, Sheet22, Sheet23, Sheet24, Sheet25, Sheet26, Sheet27, Sheet28, Sheet29, Sheet30 …]
